# Supplementary material for: Allele-specific endogenous tagging and quantitative analysis of β-catenin in colorectal cancer cells
Source: eLife journal article supplement (doi:10.7554/elife.64498), 2021-12-22
Supplement: fig7-data2 [file Figure 7XXXSource Data 2.pdf › Figure 7XXXSource Data 2.pdf]

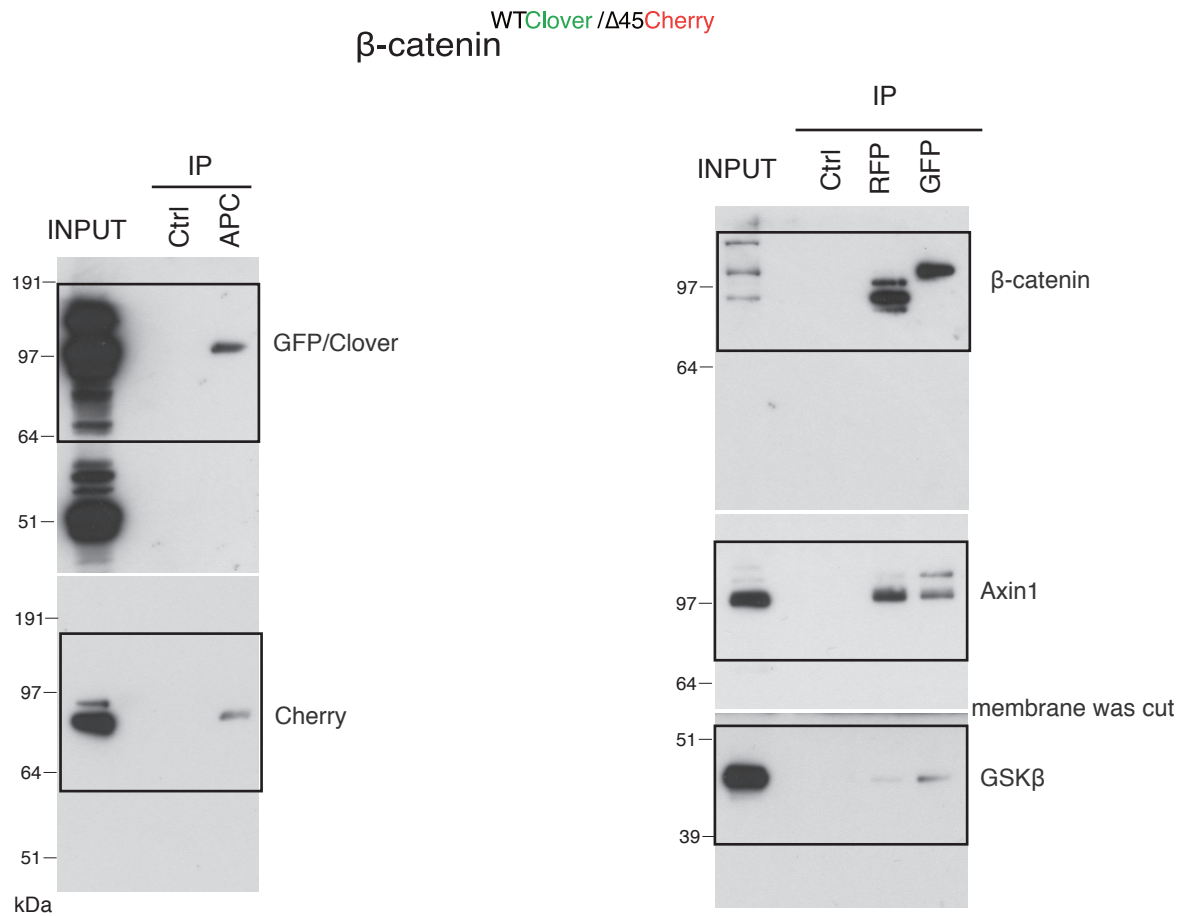

**Figure 7-figure supplement 1: Truncation of APC affects abundance and diffusion of wild-type but not mutant  $\beta$ -catenin in the nucleus.**

**(B)** Both  $\beta$ -catenin alleles of HCT116 cells bind to APC, GSK3 $\beta$  and Axin1. IP with anti-APC antibody was performed GFP/Clover and Cherry were detected (left panel). IPs with RFP/Cherry and GFP/Clover beads were performed and  $\beta$ -catenin, Axin1 and GSK3 $\beta$  were detected (right panel). Representative experiments from 3 independent are shown. The same samples were used for Figure 2C.
