# Supplementary material for: Allele-specific endogenous tagging and quantitative analysis of β-catenin in colorectal cancer cells
Source: eLife. 2022 Jan 11;11:e64498. doi: 10.7554/eLife.64498 (PMC8752093; doi:10.7554/eLife.64498)
Supplement: Figure 3—source data 1. — (A) Proliferation of the indicated HCT116 cell clones was monitored by live-cell imaging using an Incucyte instrument. (B) In HCT116 β-cateninWTClover/∆45Cherry, mRNA-levels of CTNNB1, AXIN2, Cherry, and Clover were determined by RT-qPCR in control conditions and upon depletion of CTNNB1/β-catenin by siRNA (n=5; mean ± SD). Figure 3—figure supplement 1: Validation of the physiological function of fluorescently tagged β-catenin. (A) In HCT116 β-cateninWTClover/∆45 and β-cateninWT/∆45Cherry mRNA-levels of CTNNB1, AXIN2, CHERRY, and CLOVER were determined by RT-qPCR upon silencing of CTNNB1/β-catenin. Immunofluorescence analysis of HCT116 β-cateninWTClover/∆45 and β-cateninWT/∆45Cherry after siRNA-mediated knockdown of CTNNB1 is shown (n=3; mean ± SEM; scale bar: 100 μm). [file elife-64498-fig3-data1.xlsx]

## Sheet: A
Figure 3. Fluorescently tagged β-catenin variants are functional and localize to adherens junctions.
(A) Proliferation of the indicated HCT116 cell clones was monitored by live-cell imaging using an Incucyte instrument.
	Confluences %
hours	parental	catenin WT/-	#33 β-catenin wtClover/∆45	#45 β-catenin wt/∆45Cherry	#37 β-catenin wtClover/∆45Cherry
0	13.4047	14.3891	13.2009	13.2195	13.5156
2	14.2872	15.4319	14.3962	14.3665	15.2695
4	14.9664	16.5873	15.6856	15.643	17.1626
6	15.8307	17.7245	17.0574	16.9324	18.8162
8	17.222	19.0654	18.4337	18.211	20.1286
10	19.1472	20.3638	19.9763	19.6562	21.6403
12	21.3957	21.8153	21.7824	21.4371	23.9027
14	23.6257	23.3464	23.9133	23.7844	27.1447
16	25.7453	24.9284	26.4721	26.8327	31.2262
18	27.7786	26.6223	28.9212	29.939	34.8229
20	30.3884	28.4335	31.6652	33.4376	38.4363
22	33.9265	30.3166	34.595	37.0508	41.7735
24	38.082	32.3342	37.8983	40.8015	45.336
26	42.782	34.5561	41.5872	45.0235	49.2941
28	47.2917	36.8758	45.4889	49.3615	53.5289
30	51.9233	39.3094	49.6787	53.7353	57.7632
32	56.9138	41.8178	53.7714	57.5508	61.4311
34	62.1902	44.3776	58.0209	60.9545	64.6276
36	67.6934	46.7895	62.505	63.8811	67.4141
38	72.8025	49.2398	66.9311	66.6268	69.9394
40	77.3371	51.6572	71.5097	69.3331	72.5387
42	81.2842	54.3505	75.8658	72.1153	75.1189
44	84.7595	57.0215	79.9046	74.7922	77.5732
46	87.8991	59.8459	83.4867	77.2838	79.7628
48	90.6192	62.4679	86.5621	79.6443	81.4701
50	92.9065	65.114	89.2956	82.0259	83.0988
52	94.7123	67.5828	91.6016	84.3962	84.7583
54	96.1303	70.1796	93.428	86.6879	86.1942
56	97.2092	72.5873	94.9849	88.8814	87.6245
58	97.9117	74.8431	96.1355	90.9641	88.9019
60	98.4419	77.1147	97.0509	92.7283	90.0904
62	98.9029	79.3215	97.7267	94.2348	91.1472
64	99.2034	81.4622	98.2904	95.5736	92.1155
66	99.4315	83.5866	98.6998	96.6531	93.0056
68	99.5905	85.482	99.0082	97.5079	93.8183
70	99.6853	87.2676	99.2738	98.1223	94.5868
72	99.7728	88.9377	99.4716	98.6297	95.2931
74	99.8334	90.5213	99.6189	98.9487	95.9269
76	99.8837	91.883	99.72	99.2274	96.4493
78	99.9219	93.3177	99.8007	99.414	96.9825
80	99.9486	94.5356	99.8652	99.5823	97.411
82	99.9661	95.6664	99.8991	99.6946	97.8735
84	99.9773	96.7818	99.922	99.8136	98.2571
86	99.989	97.6048	99.9416	99.8504	98.6184
88	99.9967	98.5065	99.963	99.9344	98.9186
90	99.9961	99.2704	99.9705	99.9913	99.1987
92	99.9964	99.2704	99.9838	100.008	99.4737
94	99.9974	99.2704	99.9949	100.081	99.7826
96	100.003	99.2704	99.9974	100.029	99.8905
98	100	100	100	100	100
100

## Sheet: B
Figure 3. Fluorescently tagged β-catenin variants are functional and localize to adherens junctions.
(B) In HCT116 β-cateninWTClover/∆45Cherry, mRNA-levels of CTNNB1, AXIN2, Cherry and Clover were determined by RT-qPCR in control conditions and upon depletion of CTNNB1/β-catenin by siRNA (n = 5; mean ± SD). (C) Representative immunofluorescence images of HCT116 β-cateninWTClover/∆45Cherry after siRNA-mediated knockdown of CTNNB1 is shown (n = 3; scale bars: 100 μm).
Figure 3B							Average Replicates	st.DEV		AVERAGE	CTNNB1	AXIN2	GFP/Clover	Cherry		ST.dev	CTNNB1	AXIN2	GFP/Clover	Cherry
		181005	180909	190905	190905_r2	190904				siCNTR	1	1	1	1		siCNTR
CTNNB1	siCNTR	1	1	1	1	1	1	0		siCTNNB1	0.140514	0.158342	0.231131	0.194959		siCTNNB1	0.0465401	0.0488313	0.142547	0.117196
CTNNB1	siBCAT	0.0710511	0.113516	0.173076	0.174494	0.170431	0.140514	0.0465401
AXIN2	siCNTR	1	1	1	1	1	1	0
AXIN2	siBCAT	0.0859714	0.140251	0.178091	0.216968	0.170431	0.158342	0.0488313
GFP/Clover	siCNTR	1	1	1	1	1	1	0
GFP/Clover	siBCAT	0.0853775	0.339279	0.0924249	0.401614	0.23696	0.231131	0.142547
Cherry	siCNTR	1	1	1	1	1	1	0
Cherry	siBCAT	0.109956	0.194923	0.0678453	0.233759	0.36831	0.194959	0.117196

## Sheet: Supplementary A
Figure 3-figure supplement 1: Validation of the physiological function of fluorescently tagged β-catenin.
(A) In HCT116 β-cateninWTClover/∆45 and β-cateninWT/∆45Cherry mRNA-levels of CTNNB1, AXIN2, CHERRY and CLOVER were determined by RT-qPCR upon silencing of CTNNB1/β-catenin. Immunofluorescence analysis of HCT116 β-cateninWTClover/∆45 and β-cateninWT/∆45Cherry after siRNA-mediated knockdown of CTNNB1 is shown (n = 3; mean ± SEM; scale bar, 100 μm).
Figure 3 - figure supplement 1A
β-catenin wtClover/∆45							Average Replicates	st.DEV		AVERAGE	CTNNB1	AXIN2	GFP/Clover		ST.dev	CTNNB1	AXIN2	GFP/Clover
		R1	R2	R3						siCNTR	1	1	1		siCNTR
CTNNB1	siCNTR	1	1	1			1			siCTNNB1	0.217146	0.299067	0.260019		siCTNNB1	0.100123	0.0153378	0.125816
CTNNB1	siBCAT	0.138696	0.280292	0.232451			0.217146	0.100123
AXIN2	siCNTR	1	1	1			1
AXIN2	siBCAT	0.184923	0.163232	0.549046			0.299067	0.0153378
GFP/Clover	siCNTR	1	1	1			1
GFP/Clover	siBCAT	0.170755	0.348686	0.260616			0.260019	0.125816
β-catenin wt/∆45Cherry
							Average Replicates	st.DEV		AVERAGE	CTNNB1	AXIN2	Cherry		ST.dev	CTNNB1	AXIN2	Cherry
		R1	R2	R3						siCNTR	1	1	1		siCNTR
CTNNB1	siCNTR	1	1	1			1			siCTNNB1	0.183581	0.218451	0.328507		siCTNNB1	0.0490883	0.0696819	0.144216
CTNNB1	siBCAT	0.194791	0.129857	0.226095			0.183581	0.0490883
AXIN2	siCNTR	1	1	1			1
AXIN2	siBCAT	0.170164	0.186856	0.298334			0.218451	0.0696819
Cherry	siCNTR	1	1	1			1
Cherry	siBCAT	0.290176	0.488016	0.20733			0.328507	0.144216
