# Supplementary material for: Allele-specific endogenous tagging and quantitative analysis of β-catenin in colorectal cancer cells
Source: eLife. 2022 Jan 11;11:e64498. doi: 10.7554/eLife.64498 (PMC8752093; doi:10.7554/eLife.64498)
Supplement: Figure 4—source data 1. — (A) Left: Scheme showing the mode of action of GSK3β inhibitor CHIR99021 and CBP inhibitor ICG-001. Right: Indicated HCT116 cell lines were treated with 10 μM CHIR99021 and 10 μM ICG-001 for 24 hr, then Wnt activity was determined by a luciferase-based TCF4/Wnt-reporter assay (upper panel) and quantification of AXIN2 mRNA-levels by RT-qPCR (n=3; mean ± SD). (B) Immunofluorescence analysis of HCT116 β-cateninWTClover/∆45Cherry after 24 hr treatment with 10 μM CHIR99021 and 10 μM ICG-001 is shown (scale bar: 10 μm). The graph on the right depicts the ratio of nuclear to cytoplasmic fluorescent signal intensity for Clover and Cherry in HCT116 β-cateninWTClover/∆45Cherry. Data from three independent experiments, each with at least 250 cells per condition, are shown as mean ± SEM. Every experiment includes at least 250 cells per condition. Enlarged representative images are shown in the Figure 4—figure supplement 2. (C) HCT116 β-cateninWTClover/∆45Cherry were treated with LGK974 for 80 hr then 200 ng/ml of recombinant Wnt3a was added for 16 hr. Intensities of the Clover or Cherry signals were measured per slide and normalized to the intensity of Hoechst staining and to the control. 10–20 slides were measured per condition in one experiment. Data of three independent experiments are shown as mean ± SEM. Each dot represents an independent experiment. Scale bar: 10 μm. Figure 4—figure supplement 1: Tagging of β-catenin does not affect its functionality in canonical Wnt signaling. Immunofluorescence analysis of HCT116 β-cateninWTClover/∆45 and β-cateninWT/∆45Cherry after 24 hr treatment with 10 μM CHIR99021 and 10 μM ICG-001 is shown. The graphs on the right show the ratio of nuclear to cytoplasmic fluorescence intensities for Clover and Cherry in β-cateninWTClover/∆45 and β-cateninWT/∆45Cherry, respectively (n=3 and 4; mean ± SEM). WRE, Wnt responsive element. Scale bar: 10 μm. [file elife-64498-fig4-data1.xlsx]

## Sheet: A
Figure 4. Tagging of β-catenin does not affect functionality in canonical Wnt signalling.
(A) Left: Scheme showing the mode of action of GSK3β inhibitor CHIR99021 and CBP inhibitor ICG-001. Right: Indicated HCT116 cell lines were treated with 10 μM CHIR99021 and 10 μM ICG-001 for 24 h, then Wnt activity was determined by a luciferase-based TCF4/Wnt-reporter assay (upper panel) and quantification of AXIN2 mRNA-levels by RT-qPCR (n = 3; mean ± SD). WRE: Wnt responsive element.
				TCF4/Wnt-reporter assay
			R1	R2	R3	R4		AVERAGE	SD
	parental	Control/DMSO	1	1	1	1
		CHIR	3.9	4.38	4.394	4.9245		4.39963	0.418543
		ICG	0.34384	0.2454	0.21	0.57625		0.343873	0.164942
	#33	Control/DMSO	1	1	1	1
		CHIR	5.0714	5.0536	3.412	2.4838		4.0052	1.27834
		ICG	0.29078	0.22236	0.69688	0.231797		0.360454	0.226318
	#37	Control/DMSO	1	1	1	1
		CHIR	5.32566	3.644	3.03176	4.07652		4.01948	0.970556
		ICG	0.62569	0.1234	0.38805	0.49358		0.40768	0.213
	#45	Control/DMSO	1	1	1	1
		CHIR	5.0714	3.08588	3.5518	3.09224		3.70033	0.93972
		ICG	0.29078	0.08285	0.26878	0.535987		0.294599	0.185999
	Relative AXIN2 expression
			R1	R2	R3		AVERAGE	SD
	parental	Control/DMSO	1	1	1		1
		CHIR	7.11074	6.23971	8.02777		7.12607	0.894132
		ICG	0.399149	0.364755	0.438303		0.400736	0.0367995
	#33	Control/DMSO	1	1	1		1
		CHIR	8.39773	7.94474	8.13984		8.16077	0.227221
		ICG	0.203768	0.181747	0.29937		0.228295	0.0625297
	#37	Control/DMSO	1	1	1		1
		CHIR	6.49802	7.31065	6.6116		6.80676	0.440065
		ICG	0.257921	0.313166	0.213899		0.261662	0.0497393
	#45	Control/DMSO	1	1	1		1
		CHIR	7.11074	6.40856	6.12623		6.54851	0.506956
		ICG	0.224533	0.168989	0.134904		0.176142	0.0452409

## Sheet: B
Figure 4. Tagging of β-catenin does not affect functionality in canonical Wnt signalling.
(B) Immunofluorescence analysis of HCT116 β-cateninWTClover/∆45Cherry after 24 h treatment with 10 μM CHIR99021 and 10 μM ICG-001 is shown (scale bar: 10 μm). The graph on the right depicts the ratio of nuclear to cytoplasmic fluorescent signal intensity for Clover and Cherry in HCT116 β-cateninWTClover/∆45Cherry. Data from three independent experiments, each with at least 250 cells per condition…
	Control/DMSO
	DMSO	RATIO intensity density Clover	AVERAGE			DMSO	RATIO intensity density Cherry	AVERAGE
	Ratio R1	0.364033	0.255565			Ratio R1	0.397452	0.275301
	Ratio R2	0.230843				Ratio R2	0.22901
	Ratio R3	0.171818				Ratio R3	0.19944
	CHIR					CHIR
		RATIO intensity density Clover	AVERAGE				RATIO intensity density Cherry	AVERAGE
	Ratio R1	0.605828	0.743889			Ratio R1	0.640449	0.764318
	Ratio R2	0.75943				Ratio R2	0.80936
	Ratio R3	0.86641				Ratio R3	0.843145
	ICG	RATIO intensity density Clover	AVERAGE			ICG	RATIO intensity density Cherry	AVERAGE
	Ratio R1	0.136916	0.131794			Ratio R1	0.155861	0.180784
	Ratio R2	0.0837601				Ratio R2	0.0780101
	Ratio R3	0.174705				Ratio R3	0.308481

## Sheet: C
Figure 4. Tagging of β-catenin does not affect functionality in canonical Wnt signalling.
(C) HCT116 β-cateninWTClover/∆45Cherry were treated with LGK974 for 100 h before 200 ng/ml recombinant Wnt3a was added for 16 h. Intensities of the Clover or Cherry signals were measured per slide and normalized to the intensity of Hoechst staining and to the control. 10-20 slides were measured per condition in one experiment. Data of three independent experiments are shown as mean ± SEM. Each do…
	Ctrl		Ctrl+Wnt3a		LGK		LGK+Wnt3a
	Clover	Cherry	Clover	Cherry	Clover	Cherry	Clover	Cherry
210203	1	1	1.21796	0.932806	0.35939	0.545007	0.951609	0.987607
210215	1	1	1.30447	1.29224	0.297023	0.265143	1.35488	1.16144
210305	1	1	1.8254	1.40794	0.371543	0.493394	2.21249	2.05285

## Sheet: Supplementary 1
Figure 4-figure supplement 1: Tagging of β-catenin does not affect its functionality in canonical Wnt signaling. ICG-001 is shown. The graphs on the right show the ratio of nuclear to cytoplasmic fluorescence intensities for Clover and Cherry in β-cateninWTClover/∆45 and β-cateninWT/∆45Cherry, respectively (n = 3 and 4; mean ± SEM). Scale bar, 10 μm.
Immunofluorescence analysis of HCT116 β-cateninWTClover/∆45 and β-cateninWT/∆45Cherry after 24 h treatment with 10 μM CHIR99021 and 10 μM
	#33 β-catenin wtClover/∆45
	Ctrl/DMSO	CHIR	ICG001
RATIO intensity density Clover	0.144298	1.2286	0.114009
	0.326234	1.03078	0.0905498
	0.694786	0.942176	0.245597
	0.205111	1.02577	0.0748148
Average	0.342607	1.05683	0.131243
	#45 β-catenin wt/∆45Cherry
	Ctrl/DMSO	CHIR	ICG001
RATIO intensity density Cherry	0.24374	0.573065	0.152084
	0.240293	0.626394	0.146255
	0.216108	0.537449	0.133843
Average	0.233381	0.57897	0.144061
