# Supplementary material for: Allele-specific endogenous tagging and quantitative analysis of β-catenin in colorectal cancer cells
Source: eLife. 2022 Jan 11;11:e64498. doi: 10.7554/eLife.64498 (PMC8752093; doi:10.7554/eLife.64498)
Supplement: Figure 5—source data 1. — (A) Expression levels of AXIN2, CTNNB1/β-catenin, Cherry, and Clover were measured 72 hr after knockdown with siRNAs directed against Clover, Cherry, or both in HCT116 β-cateninWTClover/∆45Cherry (n=4, mean ± SD). (B) Immunofluorescence analysis of HCT116 β-cateninWTClover/∆45Cherry upon transfection with siRNAs targeting CTNNB1, CLOVER, CHERRY, or a combination of CLOVER and CHERRY (scale bar: 25 μm). Intensities of the Clover or Cherry signals were measured per slide and normalized to the intensity of Hoechst staining. 5–10 slides were measured per condition and are shown as dots. Representative one from four independent experiments (Figure 5—figure supplement 1) is shown. Figure 5—figure supplement 1: Immunofluorescence analysis of HCT116 β-cateninWTClover/∆45Cherry upon transfection with siRNAs targeting CTNNB1, CLOVER, CHERRY, or a combination of CLOVER and CHERRY. Representative images from Figure 5. Scale bar: 25 μm. Immunofluorescence analysis of HCT116 β-cateninWTClover/∆45Cherry upon transfection with siRNAs targeting CTNNB1, CLOVER, CHERRY, or a combination of CLOVER and CHERRY (scale bar: 25 μm). Intensity of Clover or Cherry signal was measured per slide and normalized to the intensity of Hoechst staining and then normalized to control. 5–10 slides per condition were measured. Data of four independent experiments are shown as mean ± SEM. Each dot represents an independent experiment. [file elife-64498-fig5-data1.xlsx]

## Sheet: A
Figure 5. Wild-type and mutant β-catenin both contribute to Wnt pathway activation.
(A) Expression levels of AXIN2, CTNNB1/β-catenin, Cherry and Clover were measured 72 h after knockdown with siRNAs directed against Clover, Cherry or both in HCT116 β-cateninWTClover/∆45Cherry (n = 4, mean ± SD).
	Relative AXIN2 expression
	181020	181023	181025	181025 II		AVERAGE_AXIN2	SEM	ST.DEV
siCtrl	1	1	1	1		1	0	0
siCTNNB1	0.388234	0.0890031	0.213899	0.181118		0.218064	0.0625813	0.125163
siCHERRY	1.14076	0.220676	0.547147	0.417544		0.581533	0.198123	0.396246
siClover	0.849685	0.278355	0.447513	0.311003		0.471639	0.131232	0.262465
siCherry+Clover	0.320856	0.0984135	0.277392	0.237336		0.233499	0.0481497	0.0962995
	Relative CTNNB1 expression
	181020	181023	181025	181025 II		AVERAGE_CTNNB1	SEM	ST.DEV
siCtrl	1	1	1	1		1	0	0
siCTNNB1	0.251739	0.0536603	0.114626	0.110721		0.132686	0.0420588	0.0841176
siCHERRY	0.823591	0.484645	0.51943	0.524858		0.588131	0.0789906	0.157981
siClover	0.757858	0.541488	0.609205	0.512278		0.605207	0.0547831	0.109566
siCherry+Clover	0.378929	0.181118	0.345079	0.257028		0.290539	0.0446126	0.0892252
	Relative Cherry expression
	181020	181023	181025	181025 II		AVERAGE_CHERRY	SEM	ST.DEV
siCtrl	1	1	1	1		1	0	0
siCTNNB1	0.244855	0.129857	0.166662	0.115023		0.1641	0.0290244	0.0580489
siCHERRY	0.564482	0.146604	0.744839	0.268874		0.4312	0.136467	0.272933
siClover	2.67586	1.03526	1.54756	1.39959		1.66457	0.353863	0.707726
siCherry+Clover	0.955945	0.203768	0.19751	0.468136		0.45634	0.178075	0.356151
	Relative Clover expression
	181020	181023	181025	181025 II		AVERAGE_Clover/GFP	SEM	ST.DEV
siCtrl	1	1	1	1		1	0	0
siCTNNB1	0.328736	0.0705603	0.202361	0.15283		0.188622	0.0540372	0.108074
siCHERRY	1.64148	0.675955	0.855595	1.15669		1.08243	0.211094	0.422189
siClover	0.787308	0.349896	0.367292	0.348686		0.463296	0.108088	0.216175
siCherry+Clover	0.63728	0.301452	0.773782	0.494828		0.551836	0.101038	0.202075

## Sheet: B
Figure 5. Wild-type and mutant β-catenin both contribute to Wnt pathway activation.
(B) Immunofluorescence analysis of HCT116 β-cateninWTClover/∆45Cherry upon transfection with siRNAs targeting CTNNB1, CLOVER, CHERRY or a combination of CLOVER and CHERRY (scale bar: 25 μm). Intensities of the Clover or Cherry signals were measured per slide and normalized to the intensity of Hoechst staining. Five to ten slides were measured per condition and are shown as dots. Representative on…
Intensity Clover/Hoechst							Intensity Cherry/Hoechst
siCtrl	siCTNNB1	siCherry	siClover	siClover+siCherry			siCtrl	siCTNNB1	siCherry	siClover	siClover+siCherry
0.882736	0.157967	1.79362	0.635849	0.410326			0.672964	0.121249	0.413308	0.744654	0.302989
1.24408	0.18903	0.895497	0.509545	0.707477			1.055	0.148759	0.232947	0.572687	0.503279
0.968614	0.205945	2.46328	0.706723	0.43044			0.869805	0.16495	0.615721	0.830464	0.317182
0.902535	0.144776	1.09066	0.464801	0.441806			0.780615	0.108127	0.398302	0.496318	0.34214
0.805831	0.188792	2.73333	0.61299	0.36238			0.670517	0.146305	0.635556	0.645128	0.288762
1.18126	0.216476	1.40241	0.468852	0.467687			0.925131	0.173957	0.353618	0.476721	0.365306
1.45434	0.123515	3.15502	0.634235	0.434992			1.16566	0.088284	0.742151	0.592249	0.332263
1.20241	0.158093	1.89683	0.539188	0.344794			0.971407	0.119699	0.462104	0.515388	0.286632
1.33015	0.184202		0.693564				0.9799	0.145516		0.59703
0.82629							0.635565
1.07982	0.174311	1.92883	0.585083	0.449988			0.872657	0.135205	0.481713	0.607849	0.342319

## Sheet: Supplementary
Figure 5-figure supplement 1: Immunofluorescence analysis of HCT116 β-cateninWTClover/∆45Cherry upon transfection with siRNAs targeting CTNNB1, CLOVER, CHERRY or a combination of CLOVER and CHERRY.
Representative images from Figure 5. Scale bar: 25 μm. Immunofluorescence analysis of HCT116 β-cateninWTClover/∆45Cherry upon transfection with siRNAs targeting CTNNB1, CLOVER, CHERRY or a combination of CLOVER and CHERRY (scale bar: 25 μm). Intensity of Clover or Cherry signal was measured per slide and normalized to the intensity of Hoechst staining and then normalized to control. 5-10 slides p…
	Normalized intensity = Average (Intensity Clover/Hoechst)/ Average siCtrl (Intensity Clover/Hoechst)
siCtrl	1	1	1	1
siCTNNB1	0.161425	0.479569	0.203828	0.500081
siCherry	1.78625	2.20423	2.47274	2.65719
siClover	0.541832	0.555329	0.483645	0.868061
siCherry+siClover	0.449988	0.520367	0.538622	0.368277
	Normalized intensity = Average (Intensity Cherry/Hoechst)/ Average siCtrl (Intensity Cherry/Hoechst)
siCtrl	1	1	1	1
siCTNNB1	0.154935	0.31	0.135	0.384599
siCherry	0.552008	0.506814	0.835052	0.837329
siClover	0.69655	0.80685	0.647948	1.53213
siCherry+siClover	0.342319	0.409793	0.419694	0.0943334
