# Supplementary material for: Allele-specific endogenous tagging and quantitative analysis of β-catenin in colorectal cancer cells
Source: eLife. 2022 Jan 11;11:e64498. doi: 10.7554/eLife.64498 (PMC8752093; doi:10.7554/eLife.64498)
Supplement: Figure 6—source data 1. — (A) Concentrations (left) and diffusion coefficients (right) of Clover-tagged wild-type β-catenin and Cherry-tagged mutant β-catenin in the cytosol of HCT116 β-cateninWTClover/∆45Cherry. (C) Concentrations (left) and diffusion coefficients (right) of Clover-tagged wild-type β-catenin and Cherry-tagged mutant β-catenin measured on HCT116 β-cateninWTClover/∆45Cherry cells that were treated for 14–26 hr with either 10 µM CHIR99021 or DMSO as control. (D) HCT116 β-cateninwtClover/∆45Cherry cells were treated with 5 µM of LGK974 for 96 hr. Sixteen hours before termination of the experiment, 200 ng/ml of recombinant Wnt3a was added. FCS analysis was performed in the cytosol (data shown here) and in the nucleus (data shown in Figure 6—figure supplement 1). Each data point represents a 120 s FCS measurement in a single cell. In total, more than 40 cells per condition were measured in three independent experiments per box plot. p-values were calculated with the Mann-Whitney test (*** <0.001; ** <0.01; * <0.05; NS – non-significant). See also Supplementary file 1. Figure 6—figure supplement 1: Cross-correlation analysis reveals that the two β-catenin protein isoforms diffuse independently. (A) Shown are representative autocorrelation curves (green, red) and the cross-correlation (blue) from 120 s FCS measurements in the cytosol and the nucleus of HCT116 β-cateninWTClover/∆45Cherry. The non-zero amplitudes of the autocorrelation curves in the green and red color channels indicate the presence of both β-catenin isoforms in the cytosol and in the nucleus. Jagged lines: experimental data, smooth lines, fits with a model function, y-axis: amplitudes of the pair correlation functions. (B) HCT116 β-cateninWTClover/∆45Cherry cells were treated with 5 µM of LGK974 for 96 hr. Sixteen hours before termination of the experiment, 200 ng/ml of recombinant Wnt3a was added. Afterward, FCS measurements were performed in the cytosol (data shown in Figure 6) and in the nucleus (shown here). For [file elife-64498-fig6-data1.xlsx]

## Sheet: A
Figure 6: FCS autocorrelation analyses reveal differences in the dynamics and concentrations of wild-type and mutant β-catenin.
. (A) Concentrations (left) and diffusion coefficients (right) of Clover-tagged wild-type β-catenin and Cherry-tagged mutant β-catenin in the cytosol of HCT116 β-cateninWTClover/∆45Cherry.
Figure 6A	Concentration (nM)		Diffusion coefficient (µm² s-1)
Location	Cytosol
Treatment	DMSO
Version	WT	Δ45	WT	Δ45
	4,50E+01	5,72E+01	1,29E+01	1,18E+01
	3,02E+01	7,23E+01	2,10E+01	7,89E+00
	3,43E+01	6,66E+01	2,61E+01	8,33E+00
	4,57E+01	7,55E+01	1,60E+01	1,57E+01
	4,17E+01	7,93E+01	1,50E+01	1,11E+01
	5,67E+01	9,09E+01	1,57E+01	9,74E+00
	3,14E+01	8,30E+01	2,38E+01	1,16E+01
	5,03E+01	1,05E+02	1,94E+01	1,19E+01
	3,27E+01	1,07E+02	2,15E+01	7,15E+00
	4,83E+01	1,53E+02	2,37E+01	1,26E+01
	6,00E+01	1,25E+02	1,21E+01	8,83E+00
	4,35E+01	7,53E+01	1,40E+01	1,04E+01
	3,08E+01	5,97E+01	2,20E+01	1,09E+01
	6,12E+01	1,20E+02	1,43E+01	8,53E+00
	4,94E+01	8,35E+01	2,13E+01	1,35E+01
	5,34E+01	8,95E+01	1,11E+01	8,08E+00
	3,87E+01	5,95E+01	2,19E+01	1,13E+01
	2,91E+01	6,49E+01	2,72E+01	9,02E+00
	3,04E+01	5,88E+01	1,29E+01	1,36E+01
	2,62E+01	7,21E+01	1,72E+01	8,94E+00
	3,00E+01	6,60E+01	9,48E+00	1,13E+01
	2,30E+01	6,24E+01	1,43E+01	1,10E+01
	2,30E+01	8,56E+01	1,23E+01	8,17E+00
	2,16E+01	7,97E+01	3,03E+01	9,20E+00
	1,97E+01	6,09E+01	1,59E+01	9,83E+00
	2,73E+01	7,33E+01	1,49E+01	9,77E+00
	1,85E+01	5,76E+01	2,51E+01	9,27E+00
	3,99E+01	8,45E+01	8,08E+00	8,64E+00
	2,95E+01	7,78E+01	1,37E+01	1,26E+01
	2,82E+01	6,52E+01	1,29E+01	1,26E+01
	4,54E+01	8,35E+01	2,78E+01	8,21E+00
	2,74E+01	7,62E+01	2,56E+01	9,84E+00
	2,44E+01	4,75E+01	2,63E+01	9,90E+00
	2,03E+01	7,10E+01	4,13E+01	9,14E+00
	3,98E+01	7,60E+01	1,85E+01	1,23E+01
	2,05E+01	1,99E+01	2,84E+01	2,19E+01
	1,13E+02	1,03E+02	7,73E+00	8,85E+00
	2,12E+01	5,05E+01	2,59E+01	1,38E+01
	8,36E+01	9,64E+01	1,29E+01	1,76E+01
	5,90E+01	7,11E+01	1,19E+01	1,58E+01
	3,70E+01	7,43E+01	1,75E+01	1,28E+01
	3,13E+01	4,15E+01	2,51E+01	1,50E+01

## Sheet: C
Figure 6: FCS autocorrelation analyses reveal differences in the dynamics and concentrations of wild-type and mutant β-catenin.
(C) Concentrations (left) and diffusion coefficients (right) of Clover-tagged wild-type β-catenin and Cherry-tagged mutant β-catenin measured on HCT116 β-cateninWTClover/∆45Cherry cells that were treated for 14 – 26 h with either 10 µM CHIR99021 or DMSO as control.
	Concentration (nM)				Diffusion coefficient (µm² s-1)					Concentration (nM)				Diffusion coefficient (µm² s-1)
Location	Cytosol				Cytosol					Nucleus				Nucleus
Treatment	DMSO		CHIR99021		DMSO		CHIR99021			DMSO		CHIR99021		DMSO		CHIR99021
Version	WT	Δ45	WT	Δ45	WT	Δ45	WT	Δ45		WT	Δ45	WT	Δ45	WT	Δ45	WT	Δ45
	4,50E+01	5,72E+01	1,05E+02	9,88E+01	1,29E+01	1,18E+01	9,02E+00	1,39E+01		4,51E+01	1,02E+02	8,53E+01	1,18E+02	1,37E+01	1,28E+01	6,03E+00	8,44E+00
	3,02E+01	7,23E+01	1,38E+02	1,28E+02	2,10E+01	7,89E+00	7,64E+00	1,06E+01		2,41E+01	5,60E+01	1,14E+02	1,08E+02	2,08E+01	1,20E+01	7,68E+00	1,06E+01
	3,43E+01	6,66E+01	1,17E+02	1,95E+02	2,61E+01	8,33E+00	5,59E+00	7,74E+00		3,37E+01	7,84E+01	1,20E+02	2,07E+02	2,63E+01	1,42E+01	5,95E+00	9,10E+00
	4,57E+01	7,55E+01	9,96E+01	9,20E+01	1,60E+01	1,57E+01	9,70E+00	1,34E+01		3,50E+01	6,07E+01	7,38E+01	7,77E+01	1,83E+01	1,66E+01	4,38E+00	7,42E+00
	4,17E+01	7,93E+01	6,76E+01	6,81E+01	1,50E+01	1,11E+01	8,17E+00	1,27E+01		4,15E+01	9,61E+01	6,03E+01	7,62E+01	1,55E+01	1,51E+01	6,86E+00	1,23E+01
	5,67E+01	9,09E+01	1,18E+02	1,01E+02	1,57E+01	9,74E+00	7,00E+00	9,28E+00		4,89E+01	1,06E+02	1,30E+02	9,37E+01	1,36E+01	1,27E+01	6,24E+00	1,37E+01
	3,14E+01	8,30E+01	1,09E+02	9,29E+01	2,38E+01	1,16E+01	8,92E+00	1,43E+01		2,91E+01	1,34E+02	8,48E+01	7,65E+01	1,11E+01	6,99E+00	5,09E+00	7,04E+00
	5,03E+01	1,05E+02	1,56E+02	1,20E+02	1,94E+01	1,19E+01	9,64E+00	1,66E+01		2,03E+01	4,84E+01	1,14E+02	1,13E+02	1,60E+01	9,38E+00	4,88E+00	6,41E+00
	3,27E+01	1,07E+02	7,18E+01	6,36E+01	2,15E+01	7,15E+00	8,29E+00	1,21E+01		1,89E+01	8,00E+01	1,06E+02	1,05E+02	1,61E+01	6,72E+00	2,93E+00	3,99E+00
	4,83E+01	1,53E+02	8,96E+01	7,41E+01	2,37E+01	1,26E+01	9,53E+00	1,36E+01		3,79E+01	1,17E+02	7,56E+01	6,68E+01	1,71E+01	1,00E+01	6,69E+00	9,48E+00
	6,00E+01	1,25E+02	1,40E+02	1,17E+02	1,21E+01	8,83E+00	8,60E+00	1,08E+01		3,60E+01	7,28E+01	1,36E+02	1,18E+02	1,26E+01	1,48E+01	8,46E+00	1,50E+01
	4,35E+01	7,53E+01	7,27E+01	6,12E+01	1,40E+01	1,04E+01	6,01E+00	8,73E+00		3,82E+01	7,94E+01	1,10E+02	1,02E+02	1,39E+01	1,72E+01	4,66E+00	6,22E+00
	3,08E+01	5,97E+01	1,02E+02	6,96E+01	2,20E+01	1,09E+01	8,01E+00	1,23E+01		3,02E+01	5,87E+01	1,04E+02	1,15E+02	1,64E+01	1,23E+01	7,34E+00	1,29E+01
	6,12E+01	1,20E+02	1,35E+02	9,90E+01	1,43E+01	8,53E+00	6,88E+00	1,10E+01		6,27E+01	1,66E+02	1,30E+02	1,07E+02	1,64E+01	1,23E+01	5,44E+00	9,67E+00
	4,94E+01	8,35E+01	9,95E+01	9,45E+01	2,13E+01	1,35E+01	6,97E+00	8,60E+00		3,70E+01	7,42E+01	7,10E+01	8,28E+01	1,89E+01	1,48E+01	6,72E+00	1,06E+01
	5,34E+01	8,95E+01	1,31E+02	1,19E+02	1,11E+01	8,08E+00	7,54E+00	9,13E+00		3,87E+01	7,90E+01	1,36E+02	1,23E+02	7,30E+00	5,92E+00	7,72E+00	1,14E+01
	3,87E+01	5,95E+01	1,40E+02	1,42E+02	2,19E+01	1,13E+01	1,08E+01	1,37E+01		3,28E+01	9,29E+01	1,34E+02	1,36E+02	1,31E+01	6,67E+00	6,36E+00	1,09E+01
	2,91E+01	6,49E+01	7,05E+01	6,81E+01	2,72E+01	9,02E+00	6,97E+00	8,13E+00		2,31E+01	1,13E+02	9,35E+01	1,02E+02	1,74E+01	7,64E+00	4,36E+00	7,23E+00
	3,04E+01	5,88E+01	7,06E+01	7,20E+01	1,29E+01	1,36E+01	7,56E+00	8,72E+00		3,32E+01	7,55E+01	4,65E+01	5,35E+01	9,72E+00	1,35E+01	5,79E+00	9,14E+00
	2,62E+01	7,21E+01	1,46E+02	1,04E+02	1,72E+01	8,94E+00	7,47E+00	9,94E+00		1,87E+01	5,93E+01	1,22E+02	1,09E+02	1,45E+01	1,20E+01	6,26E+00	1,14E+01
	3,00E+01	6,60E+01	7,65E+01	7,41E+01	9,48E+00	1,13E+01	8,93E+00	1,15E+01		3,02E+01	5,54E+01	7,34E+01	8,79E+01	6,91E+00	1,19E+01	7,00E+00	1,29E+01
	2,30E+01	6,24E+01	6,09E+01	1,15E+02	1,43E+01	1,10E+01	8,73E+00	9,78E+00		4,25E+01	9,61E+01	7,92E+01	1,23E+02	9,83E+00	1,07E+01	5,94E+00	8,71E+00
	2,30E+01	8,56E+01	1,17E+02	9,41E+01	1,23E+01	8,17E+00	8,23E+00	9,69E+00		2,20E+01	7,73E+01	6,14E+01	7,55E+01	1,07E+01	1,17E+01	4,18E+00	6,61E+00
	2,16E+01	7,97E+01	1,09E+02	1,38E+02	3,03E+01	9,20E+00	6,10E+00	9,20E+00		1,46E+01	6,83E+01	6,07E+01	1,09E+02	2,10E+01	1,11E+01	3,27E+00	6,75E+00
	1,97E+01	6,09E+01	8,92E+01	5,37E+01	1,59E+01	9,83E+00	8,53E+00	1,14E+01		1,57E+01	5,49E+01	6,87E+01	5,44E+01	1,73E+01	1,56E+01	9,08E+00	1,31E+01
	2,73E+01	7,33E+01	1,13E+02	1,06E+02	1,49E+01	9,77E+00	8,62E+00	1,05E+01		2,09E+01	7,39E+01	9,62E+01	1,09E+02	1,13E+01	6,95E+00	9,15E+00	1,35E+01
	1,85E+01	5,76E+01	6,73E+01	7,55E+01	2,51E+01	9,27E+00	9,82E+00	1,41E+01		1,57E+01	6,29E+01	7,42E+01	1,10E+02	1,36E+01	6,81E+00	6,87E+00	1,00E+01
	3,99E+01	8,45E+01	1,30E+02	1,10E+02	8,08E+00	8,64E+00	1,02E+01	1,47E+01		3,54E+01	7,06E+01	1,40E+02	1,17E+02	1,06E+01	1,50E+01	6,54E+00	1,04E+01
	2,95E+01	7,78E+01	1,31E+02	1,17E+02	1,37E+01	1,26E+01	9,18E+00	1,25E+01		4,23E+01	1,22E+02	8,62E+01	9,17E+01	1,05E+01	6,97E+00	6,34E+00	9,88E+00
	2,82E+01	6,52E+01	1,22E+02	8,11E+01	1,29E+01	1,26E+01	7,63E+00	1,10E+01				9,91E+01	6,83E+01			2,56E+00	4,58E+00
	4,54E+01	8,35E+01	6,12E+01	6,25E+01	2,78E+01	8,21E+00	1,24E+01	1,49E+01		2,07E+01	5,09E+01	7,52E+01	1,10E+02	2,12E+01	8,62E+00	6,87E+00	9,08E+00
	2,74E+01	7,62E+01	6,38E+01	5,94E+01	2,56E+01	9,84E+00	8,16E+00	1,14E+01		1,62E+01	6,27E+01	5,35E+01	7,38E+01	2,27E+01	1,10E+01	6,69E+00	9,63E+00
	2,44E+01	4,75E+01	9,57E+01	7,73E+01	2,63E+01	9,90E+00	8,78E+00	1,20E+01		1,37E+01	4,40E+01	1,16E+02	1,09E+02	2,31E+01	1,14E+01	7,51E+00	1,09E+01
	2,03E+01	7,10E+01	9,34E+01	9,36E+01	4,13E+01	9,14E+00	1,19E+01	2,00E+01		1,17E+01	5,84E+01	6,30E+01	7,92E+01	2,84E+01	1,88E+01	9,38E+00	1,39E+01
	3,98E+01	7,60E+01	1,06E+02	1,20E+02	1,85E+01	1,23E+01	7,59E+00	1,17E+01		1,99E+01	7,05E+01	9,64E+01	1,11E+02	1,73E+01	1,48E+01	6,37E+00	1,09E+01
	2,05E+01	1,99E+01	1,33E+02	9,16E+01	2,84E+01	2,19E+01	8,74E+00	1,17E+01		1,08E+01	2,34E+01	1,31E+02	1,08E+02	1,96E+01	2,34E+01	8,98E+00	1,52E+01
	1,13E+02	1,03E+02	1,04E+02	7,33E+01	7,73E+00	8,85E+00	8,35E+00	1,22E+01		4,73E+01	6,28E+01	1,18E+02	1,12E+02	8,37E+00	1,38E+01	7,19E+00	1,36E+01
	2,12E+01	5,05E+01	9,19E+01	6,43E+01	2,59E+01	1,38E+01	8,39E+00	1,28E+01		1,21E+01	4,10E+01	9,71E+01	8,89E+01	2,10E+01	1,54E+01	9,11E+00	1,45E+01
	8,36E+01	9,64E+01	8,23E+01	9,40E+01	1,29E+01	1,76E+01	9,35E+00	1,23E+01		5,67E+01	7,07E+01	1,05E+02	1,08E+02	7,62E+00	1,05E+01	8,74E+00	1,30E+01
	5,90E+01	7,11E+01	1,99E+02	1,24E+02	1,19E+01	1,58E+01	6,24E+00	9,15E+00		4,68E+01	6,41E+01	1,26E+02	1,11E+02	6,85E+00	1,18E+01	5,93E+00	1,06E+01
	3,70E+01	7,43E+01	7,81E+01	7,35E+01	1,75E+01	1,28E+01	8,50E+00	1,12E+01		2,59E+01	6,89E+01	1,33E+02	1,39E+02	1,36E+01	1,12E+01	7,26E+00	9,76E+00
	3,13E+01	4,15E+01	8,91E+01	5,97E+01	2,51E+01	1,50E+01	9,60E+00	1,35E+01		2,00E+01	4,18E+01	1,07E+02	8,74E+01	2,16E+01	1,30E+01	4,94E+00	8,48E+00

## Sheet: D
Figure 6: FCS autocorrelation analyses reveal differences in the dynamics and concentrations of wild-type and mutant β-catenin.
(D) HCT116 β-cateninwtClover/∆45Cherry cells were treated with 5 µM of LGK974 for 96 h. 16 h before termination of the experiment, 200 ng/ml of recombinant Wnt3a was added. FCS analysis was performed in the cytosol (data shown here) and in the nucleus (data shown in Figure 6-figure supplement 1). Each data point represents a 120-s FCS measurement in a single cell. In total, more than 40 cells per…
	Concentration (nM)									Diffusion coefficient (µm² s-1)
Location	Cytosol									Cytosol
Treatment 1	DMSO				LGK					DMSO				LGK
Treatment 2	Control		+Wnt3a		Control		+Wnt3a			Control		+Wnt3a		Control		+Wnt3a
Version	WT	Δ45	WT	Δ45	WT	Δ45	WT	Δ45		WT	Δ45	WT	Δ45	WT	Δ45	WT	Δ45
	1,25E+01	6,72E+01	9,10E+01	1,19E+02	7,89E+00	9,28E+01	1,78E+01	6,93E+01		2,64E+01	1,03E+01	9,27E+00	1,94E+01	2,43E+01	7,53E+00	9,93E+00	7,18E+00
	1,85E+01	5,46E+01	8,80E+01	1,22E+02	5,67E+00	1,11E+02	1,94E+01	5,79E+01		1,17E+01	1,82E+01	9,70E+00	1,41E+01	2,04E+01	1,03E+01	1,76E+01	1,50E+01
	2,68E+01	7,55E+01	4,54E+01	1,03E+02	6,58E+00	8,82E+01	9,28E+00	3,80E+01		1,67E+01	2,34E+01	8,27E+00	9,77E+00	2,58E+01	3,21E+00	1,50E+01	1,85E+01
	4,36E+01	1,14E+02	4,30E+01	1,29E+02	1,14E+01	8,81E+01	1,22E+01	9,21E+01		1,25E+01	1,96E+01	9,33E+00	8,08E+00	2,75E+01	1,29E+01	2,71E+01	1,26E+01
	3,98E+01	7,03E+01	6,79E+01	1,32E+02	7,17E+00	7,10E+01	3,61E+01	7,84E+01		1,16E+01	1,54E+01	7,53E+00	1,38E+01	2,11E+01	8,88E+00	7,13E+00	1,28E+01
	1,08E+01	9,15E+01	3,56E+01	7,37E+01	1,09E+01	8,77E+01	3,63E+01	6,41E+01		1,93E+01	1,32E+01	1,10E+01	9,29E+00	2,40E+01	8,45E+00	7,29E+00	4,77E+00
	1,59E+01	7,15E+01	6,32E+01	1,36E+02	1,02E+01	8,71E+01	1,44E+01	9,83E+01		2,09E+01	1,03E+01	8,77E+00	1,36E+01	2,88E+01	7,91E+00	1,46E+01	1,41E+01
	4,41E+01	1,25E+02	5,99E+01	1,18E+02	4,89E+00	4,90E+01	1,47E+01	1,16E+02		1,21E+01	1,91E+01	1,34E+01	1,40E+01	3,00E+01	6,25E+00	2,13E+01	8,92E+00
	1,42E+01	8,95E+01	8,01E+01	1,09E+02	5,78E+00	5,53E+01	1,72E+01	1,14E+02		2,31E+01	8,56E+00	8,71E+00	1,80E+01	2,92E+01	1,10E+01	1,38E+01	8,97E+00
	3,70E+01	9,81E+01	3,00E+01	1,04E+02	9,78E+00	1,59E+02	3,06E+01	1,06E+02		9,90E+00	1,12E+01	1,75E+01	1,22E+01	2,63E+01	5,20E+00	1,42E+01	1,68E+01
	3,70E+01	9,37E+01	6,24E+01	1,19E+02	6,17E+00	7,91E+01	4,18E+01	9,37E+01		1,28E+01	1,28E+01	8,89E+00	9,28E+00	2,57E+01	9,46E+00	8,80E+00	1,45E+01
	3,52E+01	8,01E+01	4,53E+01	1,04E+02	6,73E+00	7,46E+01	3,74E+01	1,75E+02		1,38E+01	1,77E+01	9,35E+00	1,80E+01	2,77E+01	1,14E+01	1,00E+01	6,11E+00
	--	--	--	--	--	--	--	--		--	--	--	--	--	--	--	--
	--	--	--	--	--	--	--	--		--	--	--	--	--	--	--	--
	6,54E+01	1,31E+02	4,95E+01	1,09E+02	--	--	2,58E+01	9,57E+01		8,58E+00	1,46E+01	9,92E+00	1,01E+01	--	--	1,03E+01	3,49E+00
	2,57E+01	1,02E+02	3,89E+01	1,04E+02	1,02E+01	1,03E+02	1,41E+01	7,08E+01		1,67E+01	9,44E+00	1,27E+01	1,26E+01	1,71E+01	7,42E+00	2,07E+01	1,19E+01
	5,01E+01	1,27E+02	2,67E+01	7,97E+01	5,19E+00	5,98E+01	1,56E+01	8,34E+01		9,65E+00	1,64E+01	1,21E+01	1,08E+01	2,52E+01	7,54E+00	1,78E+01	1,35E+01
	5,24E+01	1,02E+02	3,00E+01	1,26E+02	7,88E+00	1,16E+02	--	--		7,79E+00	1,10E+01	1,11E+01	1,29E+01	2,77E+01	7,21E+00	--	--
	4,63E+01	8,25E+01	3,06E+01	7,13E+01	1,21E+01	6,98E+01	1,84E+01	1,33E+02		9,09E+00	1,64E+01	8,92E+00	7,34E+00	2,09E+01	8,58E+00	1,42E+01	1,21E+01
	6,39E+01	1,20E+02	2,51E+01	1,00E+02	1,04E+01	9,33E+01	2,14E+01	1,73E+02		6,72E+00	1,21E+01	8,65E+00	7,43E+00	2,34E+01	1,43E+01	1,78E+01	1,13E+01
	3,54E+01	1,48E+02	4,10E+01	1,21E+02	7,78E+00	9,99E+01	1,97E+01	6,44E+01		1,95E+01	1,21E+01	9,66E+00	1,01E+01	1,66E+01	1,85E+01	1,25E+01	1,25E+01
	2,92E+01	8,62E+01	5,84E+01	6,93E+01	1,76E+01	5,76E+01	--	--		1,93E+01	1,62E+01	7,65E+00	1,77E+01	1,30E+01	7,30E+00	--	--
	6,02E+01	8,85E+01	3,70E+01	9,65E+01	4,92E+00	7,07E+01	2,52E+01	8,31E+01		1,13E+01	1,18E+01	1,09E+01	1,89E+01	2,45E+01	1,07E+01	8,24E+00	1,10E+01
	3,16E+01	1,37E+02	3,69E+01	8,08E+01	1,21E+01	6,32E+01	3,12E+01	1,14E+02		1,59E+01	7,81E+00	1,12E+01	1,70E+01	2,60E+01	1,18E+01	7,21E+00	7,03E+00
	5,14E+01	1,05E+02	3,90E+01	9,01E+01	1,04E+01	8,19E+01	9,21E+00	5,33E+01		6,56E+00	7,67E+00	1,64E+01	8,43E+00	2,55E+01	8,69E+00	1,44E+01	1,76E+01
	4,71E+01	1,07E+02	4,34E+01	9,24E+01	1,43E+01	5,18E+01	2,08E+01	1,33E+02		1,07E+01	9,62E+00	9,95E+00	1,27E+01	2,29E+01	8,13E+00	8,38E+00	9,97E+00
	--	--	--	--	--	--	--	--		--	--	--	--	--	--	--	--
	--	--	--	--	--	--	--	--		--	--	--	--	--	--	--	--
	2,60E+01	9,56E+01	3,97E+01	1,00E+02	5,26E+00	9,88E+01	1,19E+01	7,09E+01		1,45E+01	6,70E+00	7,95E+00	1,29E+01	2,26E+01	8,92E+00	1,40E+01	1,18E+01
	4,05E+01	1,89E+02	4,91E+01	8,25E+01	5,42E+00	9,23E+01	2,10E+01	1,35E+02		1,28E+01	6,38E+00	1,22E+01	1,31E+01	2,60E+01	9,19E+00	1,10E+01	1,16E+01
	3,87E+01	1,38E+02	3,17E+01	9,97E+01	3,82E+00	7,20E+01	3,78E+01	1,86E+02		1,02E+01	8,82E+00	7,08E+00	8,13E+00	2,59E+01	3,64E+00	7,37E+00	1,01E+01
	4,54E+01	1,06E+02	3,38E+01	9,55E+01	1,45E+01	6,75E+01	1,11E+01	6,80E+01		1,26E+01	1,11E+01	8,51E+00	9,04E+00	1,23E+01	1,29E+01	9,06E+00	9,17E+00
	3,56E+01	8,53E+01	3,23E+01	9,60E+01	1,84E+00	6,33E+01	2,27E+01	8,49E+01		1,03E+01	1,43E+01	1,16E+01	6,67E+00	2,06E+01	9,32E+00	1,23E+01	1,04E+01
	5,99E+01	1,49E+02	3,04E+01	2,69E+02	5,02E+00	7,99E+01	2,31E+01	8,92E+01		9,73E+00	7,34E+00	9,87E+00	7,76E+00	2,17E+01	7,61E+00	1,01E+01	8,92E+00
	4,03E+01	6,92E+01	4,05E+01	1,09E+02	6,32E+00	1,23E+02	1,71E+01	1,26E+02		1,31E+01	2,16E+01	9,56E+00	1,61E+01	1,52E+01	8,26E+00	1,06E+01	7,37E+00
	2,84E+01	1,05E+02	3,78E+01	9,46E+01	7,22E+00	9,00E+01	3,11E+01	1,01E+02		1,09E+01	8,26E+00	9,84E+00	1,27E+01	3,20E+01	7,65E+00	1,08E+01	7,68E+00
	2,22E+01	9,66E+01	4,21E+01	1,29E+02	3,44E+00	7,57E+01	2,37E+01	9,41E+01		1,49E+01	1,03E+01	8,55E+00	8,97E+00	2,39E+01	8,87E+00	9,99E+00	1,17E+01
	2,21E+01	8,38E+01	5,26E+01	1,26E+02	3,65E+00	6,83E+01	1,60E+01	7,75E+01		1,05E+01	1,15E+01	9,21E+00	1,17E+01	1,62E+01	8,06E+00	1,32E+01	1,13E+01
	1,77E+01	1,22E+02	5,74E+01	1,84E+02	1,61E+01	7,40E+01	1,26E+01	9,51E+01		1,46E+01	9,78E+00	8,16E+00	1,69E+01	1,64E+01	1,41E+01	1,30E+01	8,68E+00
	3,07E+01	1,06E+02	4,21E+01	1,01E+02	8,40E+00	5,89E+01	3,72E+01	9,59E+01		1,54E+01	1,12E+01	7,50E+00	7,72E+00	2,04E+01	1,36E+01	1,01E+01	1,26E+01

## Sheet: Supplementary 1A
Figure 6-figure supplement 1: Cross-correlation analysis reveals that the two β-catenin protein isoforms diffuse independently.
(A) Shown are representative autocorrelation curves (green, red) and the cross-correlation (blue) from 120-s FCS measurements in the cytosol and the nucleus of HCT116 β-cateninWTClover/∆45Cherry. The non-zero amplitudes of the autocorrelation curves in the green and red color channels indicate the presence of both β-catenin isoforms in the cytosol and in the nucleus. Jagged lines: experimental da…
	Cytosol				Nucleus					Cytosol				Nucleus
Correlation time (s)	AC red	AC green	CC		AC red	AC green	CC		Correlation time (s)	Fit AC red	Fit AC green	Fit CC		Fit AC red	Fit AC green	Fit CC
5,00E-05	2,20E-02	6,47E-02	7,44E-04		2,21E-02	9,06E-02	2,92E-03		5,00E-05	2,07E-02	6,18E-02	6,11E-04		1,98E-02	8,84E-02	1,48E-03
5,00E-05	2,20E-02	6,47E-02	7,44E-04		2,21E-02	9,06E-02	2,92E-03		5,06E-05	2,06E-02	6,18E-02	6,02E-04		1,98E-02	8,83E-02	1,46E-03
5,00E-05	2,20E-02	6,47E-02	7,44E-04		2,21E-02	9,06E-02	2,92E-03		5,12E-05	2,06E-02	6,17E-02	5,93E-04		1,98E-02	8,82E-02	1,45E-03
1,00E-04	1,98E-02	5,58E-02	2,44E-04		1,92E-02	8,28E-02	-7,23E-04		5,18E-05	2,06E-02	6,16E-02	5,84E-04		1,98E-02	8,82E-02	1,43E-03
1,00E-04	1,98E-02	5,58E-02	2,44E-04		1,92E-02	8,28E-02	-7,23E-04		5,24E-05	2,06E-02	6,16E-02	5,75E-04		1,98E-02	8,81E-02	1,42E-03
1,00E-04	1,98E-02	5,58E-02	2,44E-04		1,92E-02	8,28E-02	-7,23E-04		5,30E-05	2,06E-02	6,15E-02	5,67E-04		1,98E-02	8,80E-02	1,41E-03
1,00E-04	1,98E-02	5,58E-02	2,44E-04		1,92E-02	8,28E-02	-7,23E-04		5,36E-05	2,06E-02	6,14E-02	5,58E-04		1,98E-02	8,79E-02	1,39E-03
1,50E-04	1,94E-02	5,20E-02	-4,99E-04		1,85E-02	7,24E-02	-1,15E-04		5,42E-05	2,06E-02	6,14E-02	5,50E-04		1,98E-02	8,78E-02	1,38E-03
1,50E-04	1,94E-02	5,20E-02	-4,99E-04		1,85E-02	7,24E-02	-1,15E-04		5,48E-05	2,06E-02	6,13E-02	5,41E-04		1,98E-02	8,77E-02	1,36E-03
1,50E-04	1,94E-02	5,20E-02	-4,99E-04		1,85E-02	7,24E-02	-1,15E-04		5,55E-05	2,06E-02	6,12E-02	5,33E-04		1,98E-02	8,76E-02	1,35E-03
2,00E-04	1,78E-02	4,80E-02	9,10E-05		1,79E-02	7,29E-02	-5,52E-04		5,61E-05	2,05E-02	6,12E-02	5,25E-04		1,97E-02	8,75E-02	1,34E-03
2,00E-04	1,78E-02	4,80E-02	9,10E-05		1,79E-02	7,29E-02	-5,52E-04		5,68E-05	2,05E-02	6,11E-02	5,17E-04		1,97E-02	8,74E-02	1,32E-03
2,00E-04	1,78E-02	4,80E-02	9,10E-05		1,79E-02	7,29E-02	-5,52E-04		5,74E-05	2,05E-02	6,10E-02	5,09E-04		1,97E-02	8,73E-02	1,31E-03
2,50E-04	1,78E-02	4,51E-02	-3,86E-04		1,80E-02	6,82E-02	1,58E-03		5,81E-05	2,05E-02	6,10E-02	5,01E-04		1,97E-02	8,72E-02	1,30E-03
3,00E-04	1,64E-02	4,18E-02	-1,99E-04		1,54E-02	5,97E-02	-2,56E-04		5,88E-05	2,05E-02	6,09E-02	4,94E-04		1,97E-02	8,71E-02	1,28E-03
3,00E-04	1,64E-02	4,18E-02	-1,99E-04		1,54E-02	5,97E-02	-2,56E-04		5,94E-05	2,05E-02	6,08E-02	4,86E-04		1,97E-02	8,70E-02	1,27E-03
3,50E-04	1,51E-02	4,09E-02	-3,31E-04		1,70E-02	6,22E-02	2,64E-03		6,01E-05	2,05E-02	6,07E-02	4,79E-04		1,97E-02	8,69E-02	1,26E-03
4,00E-04	1,63E-02	3,92E-02	2,02E-04		1,61E-02	5,83E-02	1,41E-03		6,08E-05	2,05E-02	6,07E-02	4,71E-04		1,97E-02	8,68E-02	1,25E-03
4,50E-04	1,46E-02	3,66E-02	1,60E-03		1,41E-02	5,57E-02	-1,16E-03		6,15E-05	2,05E-02	6,06E-02	4,64E-04		1,97E-02	8,67E-02	1,23E-03
5,00E-04	1,47E-02	3,61E-02	-3,17E-04		1,28E-02	4,83E-02	-3,84E-04		6,22E-05	2,04E-02	6,05E-02	4,57E-04		1,97E-02	8,66E-02	1,22E-03
5,50E-04	1,42E-02	3,46E-02	-6,47E-04		1,30E-02	5,01E-02	-1,04E-03		6,30E-05	2,04E-02	6,04E-02	4,50E-04		1,97E-02	8,65E-02	1,21E-03
6,50E-04	1,33E-02	3,24E-02	9,94E-04		1,39E-02	4,72E-02	1,58E-03		6,37E-05	2,04E-02	6,04E-02	4,43E-04		1,97E-02	8,64E-02	1,20E-03
7,00E-04	1,30E-02	3,05E-02	1,19E-04		1,26E-02	4,79E-02	-2,13E-03		6,44E-05	2,04E-02	6,03E-02	4,36E-04		1,96E-02	8,63E-02	1,18E-03
8,00E-04	1,20E-02	3,07E-02	5,78E-04		1,37E-02	4,56E-02	1,29E-03		6,52E-05	2,04E-02	6,02E-02	4,30E-04		1,96E-02	8,62E-02	1,17E-03
9,00E-04	1,21E-02	2,76E-02	-3,98E-04		1,19E-02	3,96E-02	2,22E-03		6,59E-05	2,04E-02	6,01E-02	4,23E-04		1,96E-02	8,61E-02	1,16E-03
1,00E-03	1,12E-02	2,69E-02	1,33E-03		1,22E-02	4,01E-02	2,23E-03		6,67E-05	2,04E-02	6,01E-02	4,17E-04		1,96E-02	8,60E-02	1,15E-03
1,10E-03	1,14E-02	2,70E-02	-9,79E-04		1,22E-02	3,94E-02	-2,03E-03		6,75E-05	2,04E-02	6,00E-02	4,10E-04		1,96E-02	8,59E-02	1,14E-03
1,25E-03	1,16E-02	2,33E-02	4,47E-04		1,09E-02	3,81E-02	1,18E-03		6,83E-05	2,03E-02	5,99E-02	4,04E-04		1,96E-02	8,58E-02	1,13E-03
1,40E-03	1,11E-02	2,30E-02	1,00E-03		9,13E-03	3,52E-02	-2,26E-03		6,90E-05	2,03E-02	5,98E-02	3,98E-04		1,96E-02	8,57E-02	1,12E-03
1,60E-03	9,46E-03	2,11E-02	1,94E-05		1,26E-02	3,18E-02	2,25E-03		6,98E-05	2,03E-02	5,97E-02	3,91E-04		1,96E-02	8,56E-02	1,10E-03
1,75E-03	9,90E-03	2,11E-02	9,20E-04		1,01E-02	2,95E-02	1,23E-03		7,07E-05	2,03E-02	5,97E-02	3,85E-04		1,96E-02	8,54E-02	1,09E-03
2,00E-03	9,32E-03	1,90E-02	1,32E-03		1,08E-02	2,79E-02	1,86E-03		7,15E-05	2,03E-02	5,96E-02	3,79E-04		1,96E-02	8,53E-02	1,08E-03
2,25E-03	7,58E-03	1,76E-02	1,36E-03		8,82E-03	2,65E-02	7,20E-04		7,23E-05	2,03E-02	5,95E-02	3,73E-04		1,95E-02	8,52E-02	1,07E-03
2,50E-03	9,72E-03	1,66E-02	7,02E-04		6,86E-03	2,43E-02	7,61E-04		7,31E-05	2,03E-02	5,94E-02	3,68E-04		1,95E-02	8,51E-02	1,06E-03
2,80E-03	8,69E-03	1,49E-02	1,29E-03		9,64E-03	2,70E-02	4,03E-04		7,40E-05	2,03E-02	5,93E-02	3,62E-04		1,95E-02	8,50E-02	1,05E-03
3,15E-03	7,42E-03	1,41E-02	-1,21E-03		8,60E-03	2,65E-02	-1,46E-04		7,48E-05	2,02E-02	5,93E-02	3,56E-04		1,95E-02	8,49E-02	1,04E-03
3,55E-03	6,93E-03	1,46E-02	1,32E-03		7,46E-03	2,13E-02	-2,78E-03		7,57E-05	2,02E-02	5,92E-02	3,51E-04		1,95E-02	8,48E-02	1,03E-03
3,95E-03	6,93E-03	1,13E-02	9,60E-04		9,36E-03	1,86E-02	-1,11E-03		7,66E-05	2,02E-02	5,91E-02	3,45E-04		1,95E-02	8,46E-02	1,02E-03
4,45E-03	5,83E-03	1,32E-02	7,79E-04		8,72E-03	1,93E-02	-1,96E-03		7,75E-05	2,02E-02	5,90E-02	3,40E-04		1,95E-02	8,45E-02	1,01E-03
5,00E-03	5,78E-03	1,14E-02	-2,23E-04		6,61E-03	1,83E-02	9,61E-05		7,84E-05	2,02E-02	5,89E-02	3,35E-04		1,95E-02	8,44E-02	9,99E-04
5,60E-03	6,85E-03	1,02E-02	2,47E-04		5,50E-03	1,66E-02	7,01E-04		7,93E-05	2,02E-02	5,88E-02	3,29E-04		1,95E-02	8,43E-02	9,89E-04
6,30E-03	5,77E-03	1,01E-02	2,72E-04		6,28E-03	1,43E-02	1,15E-03		8,02E-05	2,01E-02	5,87E-02	3,24E-04		1,94E-02	8,42E-02	9,79E-04
7,05E-03	4,27E-03	7,80E-03	9,87E-04		5,13E-03	1,00E-02	-1,98E-03		8,11E-05	2,01E-02	5,86E-02	3,19E-04		1,94E-02	8,40E-02	9,69E-04
7,90E-03	4,56E-03	7,86E-03	8,63E-04		5,67E-03	1,39E-02	9,70E-04		8,21E-05	2,01E-02	5,86E-02	3,14E-04		1,94E-02	8,39E-02	9,59E-04
8,90E-03	5,66E-03	1,00E-02	1,34E-03		3,92E-03	1,31E-02	1,40E-04		8,30E-05	2,01E-02	5,85E-02	3,09E-04		1,94E-02	8,38E-02	9,50E-04
1,00E-02	4,24E-03	5,44E-03	-6,57E-04		6,32E-03	9,65E-03	2,24E-03		8,40E-05	2,01E-02	5,84E-02	3,04E-04		1,94E-02	8,36E-02	9,40E-04
1,12E-02	4,10E-03	5,96E-03	7,39E-04		3,94E-03	1,08E-02	1,59E-03		8,50E-05	2,01E-02	5,83E-02	3,00E-04		1,94E-02	8,35E-02	9,31E-04
1,26E-02	4,09E-03	6,19E-03	-3,31E-04		3,13E-03	1,18E-02	-2,06E-03		8,59E-05	2,01E-02	5,82E-02	2,95E-04		1,94E-02	8,34E-02	9,22E-04
1,41E-02	2,91E-03	6,65E-03	1,16E-04		4,65E-03	8,19E-03	9,03E-04		8,69E-05	2,00E-02	5,81E-02	2,90E-04		1,94E-02	8,33E-02	9,13E-04
1,58E-02	3,64E-03	5,46E-03	1,77E-03		4,33E-03	7,27E-03	7,03E-04		8,79E-05	2,00E-02	5,80E-02	2,86E-04		1,93E-02	8,31E-02	9,04E-04
1,78E-02	3,31E-03	4,65E-03	-6,82E-04		2,78E-03	9,48E-03	1,80E-03		8,90E-05	2,00E-02	5,79E-02	2,81E-04		1,93E-02	8,30E-02	8,95E-04
1,99E-02	2,81E-03	1,57E-03	-3,40E-04		3,81E-03	8,78E-03	2,33E-05		9,00E-05	2,00E-02	5,78E-02	2,77E-04		1,93E-02	8,29E-02	8,86E-04
2,24E-02	3,14E-03	3,13E-03	2,42E-04		2,88E-03	7,71E-03	-1,11E-03		9,10E-05	2,00E-02	5,77E-02	2,72E-04		1,93E-02	8,27E-02	8,77E-04
2,51E-02	1,98E-03	3,49E-03	-1,11E-03		3,47E-03	3,18E-03	-5,31E-04		9,21E-05	2,00E-02	5,76E-02	2,68E-04		1,93E-02	8,26E-02	8,68E-04
2,81E-02	2,93E-03	3,76E-03	-1,21E-04		3,84E-03	4,33E-03	-1,79E-03		9,32E-05	1,99E-02	5,75E-02	2,64E-04		1,93E-02	8,25E-02	8,60E-04
3,16E-02	1,85E-03	2,91E-03	6,00E-05		2,17E-03	5,48E-03	7,92E-04		9,42E-05	1,99E-02	5,74E-02	2,60E-04		1,93E-02	8,23E-02	8,51E-04
3,54E-02	7,92E-04	1,61E-03	-4,13E-04		9,14E-04	7,87E-03	-2,27E-03		9,53E-05	1,99E-02	5,73E-02	2,55E-04		1,93E-02	8,22E-02	8,43E-04
3,97E-02	1,76E-03	1,48E-03	-6,56E-04		1,23E-03	5,27E-03	-2,05E-03		9,64E-05	1,99E-02	5,72E-02	2,51E-04		1,92E-02	8,20E-02	8,34E-04
4,46E-02	1,01E-03	2,43E-03	-1,12E-03		3,09E-03	2,41E-03	-2,00E-03		9,76E-05	1,99E-02	5,71E-02	2,47E-04		1,92E-02	8,19E-02	8,26E-04
5,00E-02	2,59E-03	1,65E-03	1,45E-03		1,18E-03	5,08E-03	1,52E-04		9,87E-05	1,99E-02	5,70E-02	2,44E-04		1,92E-02	8,18E-02	8,18E-04
5,61E-02	8,11E-04	1,26E-03	-5,23E-04		1,62E-03	3,43E-03	1,55E-03		9,98E-05	1,98E-02	5,69E-02	2,40E-04		1,92E-02	8,16E-02	8,10E-04
6,30E-02	1,46E-03	3,06E-04	6,83E-04		1,90E-03	3,48E-03	4,25E-03		1,01E-04	1,98E-02	5,68E-02	2,36E-04		1,92E-02	8,15E-02	8,02E-04
7,07E-02	1,43E-03	1,75E-03	5,94E-04		1,58E-03	3,03E-03	5,69E-04		1,02E-04	1,98E-02	5,67E-02	2,32E-04		1,92E-02	8,13E-02	7,94E-04
7,93E-02	1,23E-03	7,00E-04	-4,79E-04		2,28E-03	2,16E-03	-1,47E-03		1,03E-04	1,98E-02	5,66E-02	2,28E-04		1,92E-02	8,12E-02	7,86E-04
8,89E-02	9,53E-04	-2,40E-04	-1,05E-03		3,75E-04	3,99E-03	-6,34E-04		1,05E-04	1,98E-02	5,65E-02	2,25E-04		1,91E-02	8,10E-02	7,78E-04
9,98E-02	1,56E-03	8,13E-04	-4,21E-04		2,82E-03	2,18E-03	-1,24E-03		1,06E-04	1,97E-02	5,64E-02	2,21E-04		1,91E-02	8,09E-02	7,71E-04
1,12E-01	5,02E-04	-1,29E-04	-9,21E-04		3,00E-04	1,09E-03	-4,89E-04		1,07E-04	1,97E-02	5,63E-02	2,18E-04		1,91E-02	8,07E-02	7,63E-04
1,26E-01	8,52E-04	1,53E-03	-6,94E-04		-4,08E-04	5,87E-03	2,00E-04		1,08E-04	1,97E-02	5,62E-02	2,14E-04		1,91E-02	8,06E-02	7,55E-04
1,41E-01	2,66E-04	4,06E-05	9,30E-04		1,42E-03	3,47E-03	1,57E-03		1,09E-04	1,97E-02	5,61E-02	2,11E-04		1,91E-02	8,04E-02	7,48E-04
1,58E-01	2,17E-04	-6,88E-05	-1,30E-04		4,20E-04	5,85E-03	1,73E-03		1,11E-04	1,97E-02	5,59E-02	2,07E-04		1,91E-02	8,03E-02	7,41E-04
1,77E-01	6,90E-04	-9,39E-04	1,35E-03		-5,60E-04	7,46E-04	1,57E-03		1,12E-04	1,97E-02	5,58E-02	2,04E-04		1,91E-02	8,01E-02	7,33E-04
1,99E-01	8,66E-04	-4,15E-04	-2,40E-03		1,76E-03	-6,13E-04	3,62E-04		1,13E-04	1,96E-02	5,57E-02	2,01E-04		1,90E-02	8,00E-02	7,26E-04
2,23E-01	8,03E-04	-5,08E-04	-8,32E-04		-6,25E-04	3,93E-03	-1,18E-04		1,15E-04	1,96E-02	5,56E-02	1,98E-04		1,90E-02	7,98E-02	7,19E-04
2,51E-01	5,07E-04	7,25E-04	-3,33E-04		2,36E-03	2,22E-04	-2,07E-05		1,16E-04	1,96E-02	5,55E-02	1,94E-04		1,90E-02	7,97E-02	7,12E-04
2,81E-01	3,25E-04	-5,93E-04	1,34E-03		4,50E-04	9,64E-04	5,06E-04		1,17E-04	1,96E-02	5,54E-02	1,91E-04		1,90E-02	7,95E-02	7,05E-04
3,16E-01	7,87E-04	-5,57E-04	6,83E-05		2,03E-05	-1,02E-04	-6,48E-04		1,19E-04	1,95E-02	5,53E-02	1,88E-04		1,90E-02	7,94E-02	6,98E-04
3,54E-01	2,38E-04	-1,41E-03	-1,46E-03		2,31E-04	-1,19E-03	1,42E-03		1,20E-04	1,95E-02	5,52E-02	1,85E-04		1,90E-02	7,92E-02	6,91E-04
3,97E-01	-1,15E-03	-1,79E-03	5,40E-04		-6,51E-05	-7,54E-04	7,53E-04		1,21E-04	1,95E-02	5,50E-02	1,82E-04		1,89E-02	7,90E-02	6,85E-04
4,46E-01	-9,60E-04	-1,62E-03	5,35E-04		-7,79E-04	2,70E-03	3,46E-04		1,23E-04	1,95E-02	5,49E-02	1,79E-04		1,89E-02	7,89E-02	6,78E-04
5,00E-01	2,98E-04	4,46E-04	4,77E-05		6,90E-04	3,28E-03	3,23E-03		1,24E-04	1,95E-02	5,48E-02	1,76E-04		1,89E-02	7,87E-02	6,71E-04
5,61E-01	-8,31E-04	1,03E-03	-4,22E-04		1,18E-04	2,74E-03	1,27E-03		1,26E-04	1,94E-02	5,47E-02	1,74E-04		1,89E-02	7,85E-02	6,65E-04
6,29E-01	-1,10E-03	-6,99E-05	1,74E-03		-1,16E-03	-8,81E-04	8,87E-06		1,27E-04	1,94E-02	5,46E-02	1,71E-04		1,89E-02	7,84E-02	6,58E-04
7,06E-01	1,23E-07	-4,10E-04	6,72E-04		-4,15E-04	-1,32E-03	-6,42E-04		1,29E-04	1,94E-02	5,44E-02	1,68E-04		1,89E-02	7,82E-02	6,52E-04
7,92E-01	-1,03E-03	-1,24E-03	-2,05E-03		-5,88E-04	7,84E-04	3,48E-03		1,30E-04	1,94E-02	5,43E-02	1,65E-04		1,88E-02	7,80E-02	6,45E-04
8,89E-01	2,94E-04	5,26E-04	-2,77E-04		-1,81E-03	-1,97E-03	2,63E-03		1,32E-04	1,94E-02	5,42E-02	1,63E-04		1,88E-02	7,79E-02	6,39E-04
9,98E-01	3,05E-04	1,20E-03	9,76E-04		-2,95E-03	-1,30E-03	4,35E-04		1,33E-04	1,93E-02	5,41E-02	1,60E-04		1,88E-02	7,77E-02	6,33E-04
1,12E+00	-1,10E-03	-2,10E-03	6,50E-04		7,55E-04	2,97E-03	1,02E-04		1,35E-04	1,93E-02	5,40E-02	1,57E-04		1,88E-02	7,75E-02	6,27E-04
1,26E+00	-2,09E-04	-3,95E-04	-1,02E-03		9,11E-04	-1,75E-03	-1,18E-03		1,36E-04	1,93E-02	5,38E-02	1,55E-04		1,88E-02	7,74E-02	6,21E-04
1,41E+00	-1,61E-03	3,35E-04	-1,51E-04		-1,62E-03	1,44E-03	4,42E-04		1,38E-04	1,93E-02	5,37E-02	1,52E-04		1,88E-02	7,72E-02	6,15E-04
1,58E+00	-7,20E-04	-1,87E-05	-7,42E-04		-8,16E-04	9,99E-04	-5,79E-04		1,39E-04	1,92E-02	5,36E-02	1,50E-04		1,87E-02	7,70E-02	6,09E-04
1,77E+00	-1,26E-04	1,52E-03	-3,29E-04		-7,73E-04	-5,38E-04	2,16E-03		1,41E-04	1,92E-02	5,35E-02	1,47E-04		1,87E-02	7,68E-02	6,03E-04
1,99E+00	-2,42E-04	1,19E-04	-1,28E-03		9,31E-04	-2,52E-03	1,14E-03		1,43E-04	1,92E-02	5,33E-02	1,45E-04		1,87E-02	7,67E-02	5,97E-04
2,23E+00	-8,18E-04	-5,33E-04	5,20E-04		-1,44E-03	1,12E-03	1,40E-03		1,44E-04	1,92E-02	5,32E-02	1,43E-04		1,87E-02	7,65E-02	5,91E-04
2,51E+00	-8,83E-04	7,03E-04	-1,98E-04		2,27E-04	-5,27E-03	-2,09E-03		1,46E-04	1,91E-02	5,31E-02	1,40E-04		1,87E-02	7,63E-02	5,86E-04
2,81E+00	-4,30E-04	-2,42E-03	-8,82E-04		-7,89E-04	1,25E-03	1,23E-03		1,48E-04	1,91E-02	5,29E-02	1,38E-04		1,86E-02	7,61E-02	5,80E-04
3,15E+00	-8,84E-04	9,42E-04	-2,03E-03		8,59E-04	-1,03E-03	1,51E-03		1,49E-04	1,91E-02	5,28E-02	1,36E-04		1,86E-02	7,59E-02	5,74E-04
3,54E+00	-5,92E-04	-1,84E-03	-6,49E-04		1,57E-05	-1,32E-04	-2,20E-03		1,51E-04	1,91E-02	5,27E-02	1,34E-04		1,86E-02	7,58E-02	5,69E-04
3,97E+00	3,78E-04	-1,55E-03	-7,49E-04		-8,03E-04	2,79E-04	2,28E-03		1,53E-04	1,90E-02	5,26E-02	1,32E-04		1,86E-02	7,56E-02	5,63E-04
4,46E+00	-6,49E-04	-1,64E-03	-1,83E-03		-1,85E-03	1,21E-03	3,10E-04		1,55E-04	1,90E-02	5,24E-02	1,29E-04		1,86E-02	7,54E-02	5,58E-04
5,00E+00	4,54E-04	7,57E-04	-1,02E-03		7,26E-04	2,38E-03	4,76E-04		1,56E-04	1,90E-02	5,23E-02	1,27E-04		1,85E-02	7,52E-02	5,53E-04
									1,58E-04	1,90E-02	5,22E-02	1,25E-04		1,85E-02	7,50E-02	5,47E-04
									1,60E-04	1,89E-02	5,20E-02	1,23E-04		1,85E-02	7,48E-02	5,42E-04
									1,62E-04	1,89E-02	5,19E-02	1,21E-04		1,85E-02	7,46E-02	5,37E-04
									1,64E-04	1,89E-02	5,18E-02	1,19E-04		1,85E-02	7,45E-02	5,32E-04
									1,66E-04	1,89E-02	5,16E-02	1,17E-04		1,84E-02	7,43E-02	5,27E-04
									1,68E-04	1,88E-02	5,15E-02	1,15E-04		1,84E-02	7,41E-02	5,22E-04
									1,70E-04	1,88E-02	5,13E-02	1,13E-04		1,84E-02	7,39E-02	5,17E-04
									1,72E-04	1,88E-02	5,12E-02	1,12E-04		1,84E-02	7,37E-02	5,12E-04
									1,74E-04	1,88E-02	5,11E-02	1,10E-04		1,84E-02	7,35E-02	5,07E-04
									1,76E-04	1,87E-02	5,09E-02	1,08E-04		1,83E-02	7,33E-02	5,02E-04
									1,78E-04	1,87E-02	5,08E-02	1,06E-04		1,83E-02	7,31E-02	4,97E-04
									1,80E-04	1,87E-02	5,06E-02	1,04E-04		1,83E-02	7,29E-02	4,93E-04
									1,82E-04	1,86E-02	5,05E-02	1,03E-04		1,83E-02	7,27E-02	4,88E-04
									1,84E-04	1,86E-02	5,04E-02	1,01E-04		1,82E-02	7,25E-02	4,83E-04
									1,86E-04	1,86E-02	5,02E-02	9,94E-05		1,82E-02	7,23E-02	4,79E-04
									1,88E-04	1,86E-02	5,01E-02	9,78E-05		1,82E-02	7,21E-02	4,74E-04
									1,90E-04	1,85E-02	4,99E-02	9,62E-05		1,82E-02	7,19E-02	4,70E-04
									1,93E-04	1,85E-02	4,98E-02	9,46E-05		1,82E-02	7,17E-02	4,66E-04
									1,95E-04	1,85E-02	4,96E-02	9,30E-05		1,81E-02	7,15E-02	4,61E-04
									1,97E-04	1,84E-02	4,95E-02	9,15E-05		1,81E-02	7,13E-02	4,57E-04
									1,99E-04	1,84E-02	4,93E-02	9,00E-05		1,81E-02	7,11E-02	4,53E-04
									2,02E-04	1,84E-02	4,92E-02	8,85E-05		1,81E-02	7,09E-02	4,48E-04
									2,04E-04	1,84E-02	4,90E-02	8,70E-05		1,80E-02	7,07E-02	4,44E-04
									2,06E-04	1,83E-02	4,89E-02	8,56E-05		1,80E-02	7,05E-02	4,40E-04
									2,09E-04	1,83E-02	4,87E-02	8,42E-05		1,80E-02	7,02E-02	4,36E-04
									2,11E-04	1,83E-02	4,86E-02	8,28E-05		1,80E-02	7,00E-02	4,32E-04
									2,14E-04	1,82E-02	4,84E-02	8,15E-05		1,79E-02	6,98E-02	4,28E-04
									2,16E-04	1,82E-02	4,83E-02	8,01E-05		1,79E-02	6,96E-02	4,24E-04
									2,19E-04	1,82E-02	4,81E-02	7,88E-05		1,79E-02	6,94E-02	4,20E-04
									2,21E-04	1,81E-02	4,80E-02	7,75E-05		1,79E-02	6,92E-02	4,16E-04
									2,24E-04	1,81E-02	4,78E-02	7,62E-05		1,78E-02	6,90E-02	4,12E-04
									2,26E-04	1,81E-02	4,77E-02	7,49E-05		1,78E-02	6,87E-02	4,08E-04
									2,29E-04	1,80E-02	4,75E-02	7,37E-05		1,78E-02	6,85E-02	4,05E-04
									2,32E-04	1,80E-02	4,73E-02	7,25E-05		1,77E-02	6,83E-02	4,01E-04
									2,34E-04	1,80E-02	4,72E-02	7,13E-05		1,77E-02	6,81E-02	3,97E-04
									2,37E-04	1,79E-02	4,70E-02	7,01E-05		1,77E-02	6,79E-02	3,94E-04
									2,40E-04	1,79E-02	4,69E-02	6,90E-05		1,77E-02	6,77E-02	3,90E-04
									2,42E-04	1,79E-02	4,67E-02	6,78E-05		1,76E-02	6,74E-02	3,86E-04
									2,45E-04	1,78E-02	4,65E-02	6,67E-05		1,76E-02	6,72E-02	3,83E-04
									2,48E-04	1,78E-02	4,64E-02	6,56E-05		1,76E-02	6,70E-02	3,79E-04
									2,51E-04	1,78E-02	4,62E-02	6,45E-05		1,76E-02	6,68E-02	3,76E-04
									2,54E-04	1,77E-02	4,61E-02	6,34E-05		1,75E-02	6,65E-02	3,73E-04
									2,57E-04	1,77E-02	4,59E-02	6,24E-05		1,75E-02	6,63E-02	3,69E-04
									2,60E-04	1,77E-02	4,57E-02	6,13E-05		1,75E-02	6,61E-02	3,66E-04
									2,63E-04	1,76E-02	4,56E-02	6,03E-05		1,74E-02	6,59E-02	3,63E-04
									2,66E-04	1,76E-02	4,54E-02	5,93E-05		1,74E-02	6,56E-02	3,59E-04
									2,69E-04	1,76E-02	4,53E-02	5,83E-05		1,74E-02	6,54E-02	3,56E-04
									2,72E-04	1,75E-02	4,51E-02	5,74E-05		1,73E-02	6,52E-02	3,53E-04
									2,75E-04	1,75E-02	4,49E-02	5,64E-05		1,73E-02	6,49E-02	3,50E-04
									2,78E-04	1,74E-02	4,48E-02	5,55E-05		1,73E-02	6,47E-02	3,47E-04
									2,82E-04	1,74E-02	4,46E-02	5,45E-05		1,73E-02	6,45E-02	3,43E-04
									2,85E-04	1,74E-02	4,44E-02	5,36E-05		1,72E-02	6,42E-02	3,40E-04
									2,88E-04	1,73E-02	4,43E-02	5,27E-05		1,72E-02	6,40E-02	3,37E-04
									2,92E-04	1,73E-02	4,41E-02	5,19E-05		1,72E-02	6,38E-02	3,34E-04
									2,95E-04	1,73E-02	4,39E-02	5,10E-05		1,71E-02	6,35E-02	3,31E-04
									2,98E-04	1,72E-02	4,38E-02	5,02E-05		1,71E-02	6,33E-02	3,28E-04
									3,02E-04	1,72E-02	4,36E-02	4,93E-05		1,71E-02	6,31E-02	3,25E-04
									3,05E-04	1,71E-02	4,34E-02	4,85E-05		1,70E-02	6,28E-02	3,23E-04
									3,09E-04	1,71E-02	4,32E-02	4,77E-05		1,70E-02	6,26E-02	3,20E-04
									3,12E-04	1,71E-02	4,31E-02	4,69E-05		1,70E-02	6,24E-02	3,17E-04
									3,16E-04	1,70E-02	4,29E-02	4,61E-05		1,69E-02	6,21E-02	3,14E-04
									3,20E-04	1,70E-02	4,27E-02	4,53E-05		1,69E-02	6,19E-02	3,11E-04
									3,23E-04	1,69E-02	4,26E-02	4,46E-05		1,69E-02	6,16E-02	3,09E-04
									3,27E-04	1,69E-02	4,24E-02	4,38E-05		1,68E-02	6,14E-02	3,06E-04
									3,31E-04	1,69E-02	4,22E-02	4,31E-05		1,68E-02	6,12E-02	3,03E-04
									3,35E-04	1,68E-02	4,21E-02	4,24E-05		1,68E-02	6,09E-02	3,01E-04
									3,39E-04	1,68E-02	4,19E-02	4,17E-05		1,67E-02	6,07E-02	2,98E-04
									3,43E-04	1,67E-02	4,17E-02	4,10E-05		1,67E-02	6,04E-02	2,95E-04
									3,47E-04	1,67E-02	4,15E-02	4,03E-05		1,67E-02	6,02E-02	2,93E-04
									3,51E-04	1,66E-02	4,14E-02	3,96E-05		1,66E-02	5,99E-02	2,90E-04
									3,55E-04	1,66E-02	4,12E-02	3,90E-05		1,66E-02	5,97E-02	2,88E-04
									3,59E-04	1,66E-02	4,10E-02	3,83E-05		1,66E-02	5,95E-02	2,85E-04
									3,63E-04	1,65E-02	4,08E-02	3,77E-05		1,65E-02	5,92E-02	2,83E-04
									3,67E-04	1,65E-02	4,07E-02	3,70E-05		1,65E-02	5,90E-02	2,80E-04
									3,71E-04	1,64E-02	4,05E-02	3,64E-05		1,65E-02	5,87E-02	2,78E-04
									3,76E-04	1,64E-02	4,03E-02	3,58E-05		1,64E-02	5,85E-02	2,76E-04
									3,80E-04	1,63E-02	4,01E-02	3,52E-05		1,64E-02	5,82E-02	2,73E-04
									3,84E-04	1,63E-02	4,00E-02	3,46E-05		1,63E-02	5,80E-02	2,71E-04
									3,89E-04	1,63E-02	3,98E-02	3,40E-05		1,63E-02	5,77E-02	2,68E-04
									3,93E-04	1,62E-02	3,96E-02	3,35E-05		1,63E-02	5,75E-02	2,66E-04
									3,98E-04	1,62E-02	3,94E-02	3,29E-05		1,62E-02	5,72E-02	2,64E-04
									4,03E-04	1,61E-02	3,93E-02	3,24E-05		1,62E-02	5,70E-02	2,62E-04
									4,07E-04	1,61E-02	3,91E-02	3,18E-05		1,62E-02	5,68E-02	2,59E-04
									4,12E-04	1,60E-02	3,89E-02	3,13E-05		1,61E-02	5,65E-02	2,57E-04
									4,17E-04	1,60E-02	3,87E-02	3,07E-05		1,61E-02	5,63E-02	2,55E-04
									4,22E-04	1,59E-02	3,86E-02	3,02E-05		1,60E-02	5,60E-02	2,53E-04
									4,26E-04	1,59E-02	3,84E-02	2,97E-05		1,60E-02	5,58E-02	2,51E-04
									4,31E-04	1,59E-02	3,82E-02	2,92E-05		1,60E-02	5,55E-02	2,49E-04
									4,36E-04	1,58E-02	3,80E-02	2,87E-05		1,59E-02	5,53E-02	2,47E-04
									4,41E-04	1,58E-02	3,78E-02	2,83E-05		1,59E-02	5,50E-02	2,45E-04
									4,47E-04	1,57E-02	3,77E-02	2,78E-05		1,58E-02	5,48E-02	2,42E-04
									4,52E-04	1,57E-02	3,75E-02	2,73E-05		1,58E-02	5,45E-02	2,40E-04
									4,57E-04	1,56E-02	3,73E-02	2,69E-05		1,58E-02	5,43E-02	2,38E-04
									4,62E-04	1,56E-02	3,71E-02	2,64E-05		1,57E-02	5,40E-02	2,36E-04
									4,68E-04	1,55E-02	3,70E-02	2,60E-05		1,57E-02	5,38E-02	2,35E-04
									4,73E-04	1,55E-02	3,68E-02	2,55E-05		1,56E-02	5,35E-02	2,33E-04
									4,79E-04	1,54E-02	3,66E-02	2,51E-05		1,56E-02	5,33E-02	2,31E-04
									4,84E-04	1,54E-02	3,64E-02	2,47E-05		1,56E-02	5,30E-02	2,29E-04
									4,90E-04	1,53E-02	3,63E-02	2,43E-05		1,55E-02	5,28E-02	2,27E-04
									4,95E-04	1,53E-02	3,61E-02	2,38E-05		1,55E-02	5,25E-02	2,25E-04
									5,01E-04	1,52E-02	3,59E-02	2,34E-05		1,54E-02	5,23E-02	2,23E-04
									5,07E-04	1,52E-02	3,57E-02	2,30E-05		1,54E-02	5,20E-02	2,21E-04
									5,13E-04	1,51E-02	3,55E-02	2,27E-05		1,54E-02	5,18E-02	2,19E-04
									5,19E-04	1,51E-02	3,54E-02	2,23E-05		1,53E-02	5,15E-02	2,18E-04
									5,25E-04	1,50E-02	3,52E-02	2,19E-05		1,53E-02	5,13E-02	2,16E-04
									5,31E-04	1,50E-02	3,50E-02	2,15E-05		1,52E-02	5,10E-02	2,14E-04
									5,37E-04	1,49E-02	3,48E-02	2,12E-05		1,52E-02	5,08E-02	2,12E-04
									5,43E-04	1,49E-02	3,47E-02	2,08E-05		1,51E-02	5,05E-02	2,11E-04
									5,50E-04	1,48E-02	3,45E-02	2,05E-05		1,51E-02	5,03E-02	2,09E-04
									5,56E-04	1,48E-02	3,43E-02	2,01E-05		1,50E-02	5,00E-02	2,07E-04
									5,62E-04	1,47E-02	3,41E-02	1,98E-05		1,50E-02	4,98E-02	2,06E-04
									5,69E-04	1,47E-02	3,40E-02	1,94E-05		1,50E-02	4,95E-02	2,04E-04
									5,75E-04	1,46E-02	3,38E-02	1,91E-05		1,49E-02	4,93E-02	2,02E-04
									5,82E-04	1,46E-02	3,36E-02	1,88E-05		1,49E-02	4,90E-02	2,01E-04
									5,89E-04	1,45E-02	3,34E-02	1,85E-05		1,48E-02	4,88E-02	1,99E-04
									5,96E-04	1,45E-02	3,33E-02	1,82E-05		1,48E-02	4,85E-02	1,98E-04
									6,03E-04	1,44E-02	3,31E-02	1,79E-05		1,47E-02	4,83E-02	1,96E-04
									6,10E-04	1,44E-02	3,29E-02	1,76E-05		1,47E-02	4,81E-02	1,94E-04
									6,17E-04	1,43E-02	3,27E-02	1,73E-05		1,46E-02	4,78E-02	1,93E-04
									6,24E-04	1,43E-02	3,26E-02	1,70E-05		1,46E-02	4,76E-02	1,91E-04
									6,31E-04	1,42E-02	3,24E-02	1,67E-05		1,46E-02	4,73E-02	1,90E-04
									6,38E-04	1,42E-02	3,22E-02	1,64E-05		1,45E-02	4,71E-02	1,88E-04
									6,46E-04	1,41E-02	3,20E-02	1,61E-05		1,45E-02	4,68E-02	1,87E-04
									6,53E-04	1,41E-02	3,19E-02	1,58E-05		1,44E-02	4,66E-02	1,85E-04
									6,61E-04	1,40E-02	3,17E-02	1,56E-05		1,44E-02	4,63E-02	1,84E-04
									6,68E-04	1,40E-02	3,15E-02	1,53E-05		1,43E-02	4,61E-02	1,82E-04
									6,76E-04	1,39E-02	3,13E-02	1,51E-05		1,43E-02	4,59E-02	1,81E-04
									6,84E-04	1,39E-02	3,12E-02	1,48E-05		1,42E-02	4,56E-02	1,80E-04
									6,92E-04	1,38E-02	3,10E-02	1,46E-05		1,42E-02	4,54E-02	1,78E-04
									7,00E-04	1,38E-02	3,08E-02	1,43E-05		1,41E-02	4,51E-02	1,77E-04
									7,08E-04	1,37E-02	3,07E-02	1,41E-05		1,41E-02	4,49E-02	1,75E-04
									7,16E-04	1,36E-02	3,05E-02	1,38E-05		1,40E-02	4,46E-02	1,74E-04
									7,25E-04	1,36E-02	3,03E-02	1,36E-05		1,40E-02	4,44E-02	1,73E-04
									7,33E-04	1,35E-02	3,02E-02	1,34E-05		1,39E-02	4,42E-02	1,71E-04
									7,42E-04	1,35E-02	3,00E-02	1,31E-05		1,39E-02	4,39E-02	1,70E-04
									7,50E-04	1,34E-02	2,98E-02	1,29E-05		1,38E-02	4,37E-02	1,69E-04
									7,59E-04	1,34E-02	2,96E-02	1,27E-05		1,38E-02	4,34E-02	1,67E-04
									7,68E-04	1,33E-02	2,95E-02	1,25E-05		1,37E-02	4,32E-02	1,66E-04
									7,77E-04	1,33E-02	2,93E-02	1,23E-05		1,37E-02	4,30E-02	1,65E-04
									7,86E-04	1,32E-02	2,91E-02	1,21E-05		1,36E-02	4,27E-02	1,64E-04
									7,95E-04	1,32E-02	2,90E-02	1,19E-05		1,36E-02	4,25E-02	1,62E-04
									8,04E-04	1,31E-02	2,88E-02	1,17E-05		1,35E-02	4,23E-02	1,61E-04
									8,13E-04	1,31E-02	2,86E-02	1,15E-05		1,35E-02	4,20E-02	1,60E-04
									8,23E-04	1,30E-02	2,85E-02	1,13E-05		1,34E-02	4,18E-02	1,59E-04
									8,32E-04	1,29E-02	2,83E-02	1,11E-05		1,34E-02	4,16E-02	1,58E-04
									8,42E-04	1,29E-02	2,82E-02	1,09E-05		1,33E-02	4,13E-02	1,56E-04
									8,52E-04	1,28E-02	2,80E-02	1,07E-05		1,33E-02	4,11E-02	1,55E-04
									8,61E-04	1,28E-02	2,78E-02	1,05E-05		1,32E-02	4,09E-02	1,54E-04
									8,71E-04	1,27E-02	2,77E-02	1,03E-05		1,32E-02	4,06E-02	1,53E-04
									8,81E-04	1,27E-02	2,75E-02	1,02E-05		1,31E-02	4,04E-02	1,52E-04
									8,92E-04	1,26E-02	2,73E-02	9,99E-06		1,31E-02	4,02E-02	1,51E-04
									9,02E-04	1,26E-02	2,72E-02	9,82E-06		1,30E-02	3,99E-02	1,49E-04
									9,12E-04	1,25E-02	2,70E-02	9,65E-06		1,30E-02	3,97E-02	1,48E-04
									9,23E-04	1,24E-02	2,69E-02	9,49E-06		1,29E-02	3,95E-02	1,47E-04
									9,34E-04	1,24E-02	2,67E-02	9,33E-06		1,29E-02	3,93E-02	1,46E-04
									9,45E-04	1,23E-02	2,65E-02	9,17E-06		1,28E-02	3,90E-02	1,45E-04
									9,56E-04	1,23E-02	2,64E-02	9,01E-06		1,28E-02	3,88E-02	1,44E-04
									9,67E-04	1,22E-02	2,62E-02	8,86E-06		1,27E-02	3,86E-02	1,43E-04
									9,78E-04	1,22E-02	2,61E-02	8,71E-06		1,27E-02	3,83E-02	1,42E-04
									9,89E-04	1,21E-02	2,59E-02	8,56E-06		1,26E-02	3,81E-02	1,41E-04
									1,00E-03	1,21E-02	2,57E-02	8,42E-06		1,26E-02	3,79E-02	1,40E-04
									1,01E-03	1,20E-02	2,56E-02	8,27E-06		1,25E-02	3,77E-02	1,39E-04
									1,02E-03	1,19E-02	2,54E-02	8,13E-06		1,25E-02	3,75E-02	1,38E-04
									1,04E-03	1,19E-02	2,53E-02	8,00E-06		1,24E-02	3,72E-02	1,37E-04
									1,05E-03	1,18E-02	2,51E-02	7,86E-06		1,24E-02	3,70E-02	1,36E-04
									1,06E-03	1,18E-02	2,50E-02	7,73E-06		1,23E-02	3,68E-02	1,35E-04
									1,07E-03	1,17E-02	2,48E-02	7,59E-06		1,23E-02	3,66E-02	1,34E-04
									1,08E-03	1,17E-02	2,47E-02	7,47E-06		1,22E-02	3,64E-02	1,33E-04
									1,10E-03	1,16E-02	2,45E-02	7,34E-06		1,22E-02	3,62E-02	1,32E-04
									1,11E-03	1,16E-02	2,44E-02	7,21E-06		1,21E-02	3,59E-02	1,31E-04
									1,12E-03	1,15E-02	2,42E-02	7,09E-06		1,21E-02	3,57E-02	1,30E-04
									1,14E-03	1,14E-02	2,41E-02	6,97E-06		1,20E-02	3,55E-02	1,29E-04
									1,15E-03	1,14E-02	2,39E-02	6,85E-06		1,20E-02	3,53E-02	1,28E-04
									1,16E-03	1,13E-02	2,38E-02	6,74E-06		1,19E-02	3,51E-02	1,27E-04
									1,18E-03	1,13E-02	2,36E-02	6,62E-06		1,18E-02	3,49E-02	1,26E-04
									1,19E-03	1,12E-02	2,35E-02	6,51E-06		1,18E-02	3,47E-02	1,25E-04
									1,20E-03	1,12E-02	2,33E-02	6,40E-06		1,17E-02	3,45E-02	1,24E-04
									1,22E-03	1,11E-02	2,32E-02	6,29E-06		1,17E-02	3,42E-02	1,24E-04
									1,23E-03	1,11E-02	2,30E-02	6,18E-06		1,16E-02	3,40E-02	1,23E-04
									1,25E-03	1,10E-02	2,29E-02	6,08E-06		1,16E-02	3,38E-02	1,22E-04
									1,26E-03	1,09E-02	2,27E-02	5,97E-06		1,15E-02	3,36E-02	1,21E-04
									1,27E-03	1,09E-02	2,26E-02	5,87E-06		1,15E-02	3,34E-02	1,20E-04
									1,29E-03	1,08E-02	2,25E-02	5,77E-06		1,14E-02	3,32E-02	1,19E-04
									1,30E-03	1,08E-02	2,23E-02	5,67E-06		1,14E-02	3,30E-02	1,18E-04
									1,32E-03	1,07E-02	2,22E-02	5,58E-06		1,13E-02	3,28E-02	1,18E-04
									1,33E-03	1,07E-02	2,20E-02	5,48E-06		1,13E-02	3,26E-02	1,17E-04
									1,35E-03	1,06E-02	2,19E-02	5,39E-06		1,12E-02	3,24E-02	1,16E-04
									1,37E-03	1,06E-02	2,18E-02	5,30E-06		1,12E-02	3,22E-02	1,15E-04
									1,38E-03	1,05E-02	2,16E-02	5,21E-06		1,11E-02	3,20E-02	1,14E-04
									1,40E-03	1,05E-02	2,15E-02	5,12E-06		1,11E-02	3,18E-02	1,13E-04
									1,41E-03	1,04E-02	2,13E-02	5,03E-06		1,10E-02	3,16E-02	1,13E-04
									1,43E-03	1,03E-02	2,12E-02	4,94E-06		1,10E-02	3,14E-02	1,12E-04
									1,45E-03	1,03E-02	2,11E-02	4,86E-06		1,09E-02	3,12E-02	1,11E-04
									1,46E-03	1,02E-02	2,09E-02	4,78E-06		1,08E-02	3,10E-02	1,10E-04
									1,48E-03	1,02E-02	2,08E-02	4,70E-06		1,08E-02	3,08E-02	1,10E-04
									1,50E-03	1,01E-02	2,07E-02	4,62E-06		1,07E-02	3,07E-02	1,09E-04
									1,52E-03	1,01E-02	2,05E-02	4,54E-06		1,07E-02	3,05E-02	1,08E-04
									1,53E-03	1,00E-02	2,04E-02	4,46E-06		1,06E-02	3,03E-02	1,07E-04
									1,55E-03	9,97E-03	2,03E-02	4,38E-06		1,06E-02	3,01E-02	1,07E-04
									1,57E-03	9,91E-03	2,01E-02	4,31E-06		1,05E-02	2,99E-02	1,06E-04
									1,59E-03	9,86E-03	2,00E-02	4,24E-06		1,05E-02	2,97E-02	1,05E-04
									1,61E-03	9,81E-03	1,99E-02	4,16E-06		1,04E-02	2,95E-02	1,04E-04
									1,62E-03	9,75E-03	1,98E-02	4,09E-06		1,04E-02	2,93E-02	1,04E-04
									1,64E-03	9,70E-03	1,96E-02	4,02E-06		1,03E-02	2,92E-02	1,03E-04
									1,66E-03	9,65E-03	1,95E-02	3,95E-06		1,03E-02	2,90E-02	1,02E-04
									1,68E-03	9,59E-03	1,94E-02	3,89E-06		1,02E-02	2,88E-02	1,02E-04
									1,70E-03	9,54E-03	1,93E-02	3,82E-06		1,02E-02	2,86E-02	1,01E-04
									1,72E-03	9,49E-03	1,91E-02	3,76E-06		1,01E-02	2,84E-02	1,00E-04
									1,74E-03	9,44E-03	1,90E-02	3,69E-06		1,01E-02	2,83E-02	9,95E-05
									1,76E-03	9,38E-03	1,89E-02	3,63E-06		1,00E-02	2,81E-02	9,88E-05
									1,78E-03	9,33E-03	1,88E-02	3,57E-06		9,95E-03	2,79E-02	9,81E-05
									1,80E-03	9,28E-03	1,86E-02	3,51E-06		9,90E-03	2,77E-02	9,75E-05
									1,82E-03	9,23E-03	1,85E-02	3,45E-06		9,85E-03	2,76E-02	9,68E-05
									1,84E-03	9,17E-03	1,84E-02	3,39E-06		9,80E-03	2,74E-02	9,61E-05
									1,86E-03	9,12E-03	1,83E-02	3,33E-06		9,75E-03	2,72E-02	9,55E-05
									1,89E-03	9,07E-03	1,82E-02	3,27E-06		9,69E-03	2,70E-02	9,48E-05
									1,91E-03	9,02E-03	1,80E-02	3,22E-06		9,64E-03	2,69E-02	9,42E-05
									1,93E-03	8,97E-03	1,79E-02	3,16E-06		9,59E-03	2,67E-02	9,36E-05
									1,95E-03	8,92E-03	1,78E-02	3,11E-06		9,54E-03	2,65E-02	9,29E-05
									1,98E-03	8,87E-03	1,77E-02	3,06E-06		9,49E-03	2,64E-02	9,23E-05
									2,00E-03	8,82E-03	1,76E-02	3,00E-06		9,44E-03	2,62E-02	9,17E-05
									2,02E-03	8,76E-03	1,75E-02	2,95E-06		9,39E-03	2,60E-02	9,11E-05
									2,04E-03	8,71E-03	1,73E-02	2,90E-06		9,34E-03	2,59E-02	9,05E-05
									2,07E-03	8,66E-03	1,72E-02	2,85E-06		9,29E-03	2,57E-02	8,99E-05
									2,09E-03	8,61E-03	1,71E-02	2,80E-06		9,23E-03	2,55E-02	8,93E-05
									2,12E-03	8,56E-03	1,70E-02	2,76E-06		9,18E-03	2,54E-02	8,87E-05
									2,14E-03	8,51E-03	1,69E-02	2,71E-06		9,13E-03	2,52E-02	8,81E-05
									2,17E-03	8,46E-03	1,68E-02	2,66E-06		9,08E-03	2,50E-02	8,75E-05
									2,19E-03	8,41E-03	1,67E-02	2,62E-06		9,03E-03	2,49E-02	8,69E-05
									2,22E-03	8,37E-03	1,66E-02	2,57E-06		8,98E-03	2,47E-02	8,64E-05
									2,24E-03	8,32E-03	1,64E-02	2,53E-06		8,93E-03	2,46E-02	8,58E-05
									2,27E-03	8,27E-03	1,63E-02	2,49E-06		8,88E-03	2,44E-02	8,52E-05
									2,29E-03	8,22E-03	1,62E-02	2,44E-06		8,83E-03	2,43E-02	8,47E-05
									2,32E-03	8,17E-03	1,61E-02	2,40E-06		8,78E-03	2,41E-02	8,41E-05
									2,35E-03	8,12E-03	1,60E-02	2,36E-06		8,73E-03	2,39E-02	8,36E-05
									2,37E-03	8,07E-03	1,59E-02	2,32E-06		8,69E-03	2,38E-02	8,30E-05
									2,40E-03	8,03E-03	1,58E-02	2,28E-06		8,64E-03	2,36E-02	8,25E-05
									2,43E-03	7,98E-03	1,57E-02	2,24E-06		8,59E-03	2,35E-02	8,19E-05
									2,46E-03	7,93E-03	1,56E-02	2,20E-06		8,54E-03	2,33E-02	8,14E-05
									2,49E-03	7,88E-03	1,55E-02	2,17E-06		8,49E-03	2,32E-02	8,09E-05
									2,52E-03	7,83E-03	1,54E-02	2,13E-06		8,44E-03	2,30E-02	8,03E-05
									2,54E-03	7,79E-03	1,53E-02	2,09E-06		8,39E-03	2,29E-02	7,98E-05
									2,57E-03	7,74E-03	1,52E-02	2,06E-06		8,34E-03	2,27E-02	7,93E-05
									2,60E-03	7,69E-03	1,51E-02	2,02E-06		8,30E-03	2,26E-02	7,88E-05
									2,63E-03	7,65E-03	1,50E-02	1,99E-06		8,25E-03	2,25E-02	7,83E-05
									2,67E-03	7,60E-03	1,49E-02	1,95E-06		8,20E-03	2,23E-02	7,78E-05
									2,70E-03	7,56E-03	1,48E-02	1,92E-06		8,15E-03	2,22E-02	7,72E-05
									2,73E-03	7,51E-03	1,47E-02	1,89E-06		8,11E-03	2,20E-02	7,67E-05
									2,76E-03	7,46E-03	1,46E-02	1,85E-06		8,06E-03	2,19E-02	7,63E-05
									2,79E-03	7,42E-03	1,45E-02	1,82E-06		8,01E-03	2,17E-02	7,58E-05
									2,82E-03	7,37E-03	1,44E-02	1,79E-06		7,96E-03	2,16E-02	7,53E-05
									2,86E-03	7,33E-03	1,43E-02	1,76E-06		7,92E-03	2,15E-02	7,48E-05
									2,89E-03	7,28E-03	1,42E-02	1,73E-06		7,87E-03	2,13E-02	7,43E-05
									2,92E-03	7,24E-03	1,41E-02	1,70E-06		7,83E-03	2,12E-02	7,38E-05
									2,96E-03	7,19E-03	1,40E-02	1,67E-06		7,78E-03	2,11E-02	7,34E-05
									2,99E-03	7,15E-03	1,39E-02	1,64E-06		7,73E-03	2,09E-02	7,29E-05
									3,03E-03	7,11E-03	1,38E-02	1,62E-06		7,69E-03	2,08E-02	7,24E-05
									3,06E-03	7,06E-03	1,38E-02	1,59E-06		7,64E-03	2,07E-02	7,20E-05
									3,10E-03	7,02E-03	1,37E-02	1,56E-06		7,60E-03	2,05E-02	7,15E-05
									3,13E-03	6,98E-03	1,36E-02	1,53E-06		7,55E-03	2,04E-02	7,10E-05
									3,17E-03	6,93E-03	1,35E-02	1,51E-06		7,51E-03	2,03E-02	7,06E-05
									3,20E-03	6,89E-03	1,34E-02	1,48E-06		7,46E-03	2,01E-02	7,01E-05
									3,24E-03	6,85E-03	1,33E-02	1,46E-06		7,42E-03	2,00E-02	6,97E-05
									3,28E-03	6,80E-03	1,32E-02	1,43E-06		7,37E-03	1,99E-02	6,92E-05
									3,32E-03	6,76E-03	1,31E-02	1,41E-06		7,33E-03	1,98E-02	6,88E-05
									3,36E-03	6,72E-03	1,30E-02	1,38E-06		7,28E-03	1,96E-02	6,84E-05
									3,39E-03	6,68E-03	1,30E-02	1,36E-06		7,24E-03	1,95E-02	6,79E-05
									3,43E-03	6,64E-03	1,29E-02	1,34E-06		7,19E-03	1,94E-02	6,75E-05
									3,47E-03	6,59E-03	1,28E-02	1,31E-06		7,15E-03	1,93E-02	6,71E-05
									3,51E-03	6,55E-03	1,27E-02	1,29E-06		7,11E-03	1,91E-02	6,66E-05
									3,55E-03	6,51E-03	1,26E-02	1,27E-06		7,06E-03	1,90E-02	6,62E-05
									3,60E-03	6,47E-03	1,25E-02	1,25E-06		7,02E-03	1,89E-02	6,58E-05
									3,64E-03	6,43E-03	1,25E-02	1,23E-06		6,98E-03	1,88E-02	6,54E-05
									3,68E-03	6,39E-03	1,24E-02	1,21E-06		6,94E-03	1,86E-02	6,50E-05
									3,72E-03	6,35E-03	1,23E-02	1,18E-06		6,89E-03	1,85E-02	6,46E-05
									3,77E-03	6,31E-03	1,22E-02	1,16E-06		6,85E-03	1,84E-02	6,42E-05
									3,81E-03	6,27E-03	1,21E-02	1,14E-06		6,81E-03	1,83E-02	6,38E-05
									3,85E-03	6,23E-03	1,21E-02	1,12E-06		6,77E-03	1,82E-02	6,34E-05
									3,90E-03	6,19E-03	1,20E-02	1,11E-06		6,72E-03	1,81E-02	6,30E-05
									3,94E-03	6,15E-03	1,19E-02	1,09E-06		6,68E-03	1,79E-02	6,26E-05
									3,99E-03	6,11E-03	1,18E-02	1,07E-06		6,64E-03	1,78E-02	6,22E-05
									4,04E-03	6,08E-03	1,17E-02	1,05E-06		6,60E-03	1,77E-02	6,18E-05
									4,08E-03	6,04E-03	1,17E-02	1,03E-06		6,56E-03	1,76E-02	6,14E-05
									4,13E-03	6,00E-03	1,16E-02	1,01E-06		6,52E-03	1,75E-02	6,10E-05
									4,18E-03	5,96E-03	1,15E-02	9,97E-07		6,48E-03	1,74E-02	6,06E-05
									4,23E-03	5,92E-03	1,14E-02	9,80E-07		6,44E-03	1,73E-02	6,03E-05
									4,27E-03	5,89E-03	1,14E-02	9,63E-07		6,40E-03	1,72E-02	5,99E-05
									4,32E-03	5,85E-03	1,13E-02	9,47E-07		6,36E-03	1,70E-02	5,95E-05
									4,37E-03	5,81E-03	1,12E-02	9,30E-07		6,32E-03	1,69E-02	5,91E-05
									4,43E-03	5,77E-03	1,11E-02	9,14E-07		6,28E-03	1,68E-02	5,88E-05
									4,48E-03	5,74E-03	1,11E-02	8,99E-07		6,24E-03	1,67E-02	5,84E-05
									4,53E-03	5,70E-03	1,10E-02	8,83E-07		6,20E-03	1,66E-02	5,80E-05
									4,58E-03	5,66E-03	1,09E-02	8,68E-07		6,16E-03	1,65E-02	5,77E-05
									4,63E-03	5,63E-03	1,09E-02	8,53E-07		6,12E-03	1,64E-02	5,73E-05
									4,69E-03	5,59E-03	1,08E-02	8,39E-07		6,09E-03	1,63E-02	5,70E-05
									4,74E-03	5,56E-03	1,07E-02	8,25E-07		6,05E-03	1,62E-02	5,66E-05
									4,80E-03	5,52E-03	1,06E-02	8,10E-07		6,01E-03	1,61E-02	5,63E-05
									4,85E-03	5,49E-03	1,06E-02	7,97E-07		5,97E-03	1,60E-02	5,59E-05
									4,91E-03	5,45E-03	1,05E-02	7,83E-07		5,93E-03	1,59E-02	5,56E-05
									4,97E-03	5,42E-03	1,04E-02	7,70E-07		5,90E-03	1,58E-02	5,52E-05
									5,02E-03	5,38E-03	1,04E-02	7,56E-07		5,86E-03	1,57E-02	5,49E-05
									5,08E-03	5,35E-03	1,03E-02	7,43E-07		5,82E-03	1,56E-02	5,46E-05
									5,14E-03	5,31E-03	1,02E-02	7,31E-07		5,79E-03	1,55E-02	5,42E-05
									5,20E-03	5,28E-03	1,02E-02	7,18E-07		5,75E-03	1,54E-02	5,39E-05
									5,26E-03	5,25E-03	1,01E-02	7,06E-07		5,71E-03	1,53E-02	5,36E-05
									5,32E-03	5,21E-03	1,00E-02	6,94E-07		5,68E-03	1,52E-02	5,32E-05
									5,38E-03	5,18E-03	9,98E-03	6,82E-07		5,64E-03	1,51E-02	5,29E-05
									5,45E-03	5,15E-03	9,91E-03	6,70E-07		5,60E-03	1,50E-02	5,26E-05
									5,51E-03	5,11E-03	9,85E-03	6,59E-07		5,57E-03	1,49E-02	5,23E-05
									5,57E-03	5,08E-03	9,78E-03	6,48E-07		5,53E-03	1,48E-02	5,19E-05
									5,64E-03	5,05E-03	9,72E-03	6,36E-07		5,50E-03	1,47E-02	5,16E-05
									5,70E-03	5,02E-03	9,66E-03	6,26E-07		5,46E-03	1,46E-02	5,13E-05
									5,77E-03	4,98E-03	9,60E-03	6,15E-07		5,43E-03	1,45E-02	5,10E-05
									5,83E-03	4,95E-03	9,53E-03	6,04E-07		5,39E-03	1,45E-02	5,07E-05
									5,90E-03	4,92E-03	9,47E-03	5,94E-07		5,36E-03	1,44E-02	5,04E-05
									5,97E-03	4,89E-03	9,41E-03	5,84E-07		5,33E-03	1,43E-02	5,01E-05
									6,04E-03	4,86E-03	9,35E-03	5,74E-07		5,29E-03	1,42E-02	4,98E-05
									6,11E-03	4,83E-03	9,29E-03	5,64E-07		5,26E-03	1,41E-02	4,94E-05
									6,18E-03	4,80E-03	9,23E-03	5,54E-07		5,22E-03	1,40E-02	4,91E-05
									6,25E-03	4,76E-03	9,17E-03	5,45E-07		5,19E-03	1,39E-02	4,88E-05
									6,33E-03	4,73E-03	9,11E-03	5,36E-07		5,16E-03	1,38E-02	4,85E-05
									6,40E-03	4,70E-03	9,06E-03	5,26E-07		5,13E-03	1,37E-02	4,83E-05
									6,47E-03	4,67E-03	9,00E-03	5,17E-07		5,09E-03	1,37E-02	4,80E-05
									6,55E-03	4,64E-03	8,94E-03	5,09E-07		5,06E-03	1,36E-02	4,77E-05
									6,62E-03	4,61E-03	8,88E-03	5,00E-07		5,03E-03	1,35E-02	4,74E-05
									6,70E-03	4,58E-03	8,83E-03	4,91E-07		5,00E-03	1,34E-02	4,71E-05
									6,78E-03	4,56E-03	8,77E-03	4,83E-07		4,96E-03	1,33E-02	4,68E-05
									6,86E-03	4,53E-03	8,71E-03	4,75E-07		4,93E-03	1,32E-02	4,65E-05
									6,94E-03	4,50E-03	8,66E-03	4,67E-07		4,90E-03	1,32E-02	4,62E-05
									7,02E-03	4,47E-03	8,60E-03	4,59E-07		4,87E-03	1,31E-02	4,60E-05
									7,10E-03	4,44E-03	8,55E-03	4,51E-07		4,84E-03	1,30E-02	4,57E-05
									7,18E-03	4,41E-03	8,49E-03	4,43E-07		4,81E-03	1,29E-02	4,54E-05
									7,26E-03	4,38E-03	8,44E-03	4,35E-07		4,78E-03	1,28E-02	4,51E-05
									7,35E-03	4,36E-03	8,39E-03	4,28E-07		4,75E-03	1,28E-02	4,49E-05
									7,43E-03	4,33E-03	8,33E-03	4,21E-07		4,72E-03	1,27E-02	4,46E-05
									7,52E-03	4,30E-03	8,28E-03	4,13E-07		4,69E-03	1,26E-02	4,43E-05
									7,61E-03	4,27E-03	8,23E-03	4,06E-07		4,66E-03	1,25E-02	4,41E-05
									7,69E-03	4,25E-03	8,18E-03	3,99E-07		4,63E-03	1,24E-02	4,38E-05
									7,78E-03	4,22E-03	8,12E-03	3,93E-07		4,60E-03	1,24E-02	4,35E-05
									7,87E-03	4,19E-03	8,07E-03	3,86E-07		4,57E-03	1,23E-02	4,33E-05
									7,96E-03	4,16E-03	8,02E-03	3,79E-07		4,54E-03	1,22E-02	4,30E-05
									8,06E-03	4,14E-03	7,97E-03	3,73E-07		4,51E-03	1,21E-02	4,27E-05
									8,15E-03	4,11E-03	7,92E-03	3,66E-07		4,48E-03	1,21E-02	4,25E-05
									8,24E-03	4,09E-03	7,87E-03	3,60E-07		4,45E-03	1,20E-02	4,22E-05
									8,34E-03	4,06E-03	7,82E-03	3,54E-07		4,42E-03	1,19E-02	4,20E-05
									8,44E-03	4,03E-03	7,77E-03	3,48E-07		4,39E-03	1,18E-02	4,17E-05
									8,53E-03	4,01E-03	7,72E-03	3,42E-07		4,37E-03	1,18E-02	4,15E-05
									8,63E-03	3,98E-03	7,67E-03	3,36E-07		4,34E-03	1,17E-02	4,12E-05
									8,73E-03	3,96E-03	7,63E-03	3,30E-07		4,31E-03	1,16E-02	4,10E-05
									8,84E-03	3,93E-03	7,58E-03	3,25E-07		4,28E-03	1,15E-02	4,07E-05
									8,94E-03	3,91E-03	7,53E-03	3,19E-07		4,25E-03	1,15E-02	4,05E-05
									9,04E-03	3,88E-03	7,48E-03	3,14E-07		4,23E-03	1,14E-02	4,02E-05
									9,15E-03	3,86E-03	7,44E-03	3,08E-07		4,20E-03	1,13E-02	4,00E-05
									9,25E-03	3,83E-03	7,39E-03	3,03E-07		4,17E-03	1,13E-02	3,98E-05
									9,36E-03	3,81E-03	7,34E-03	2,98E-07		4,15E-03	1,12E-02	3,95E-05
									9,47E-03	3,78E-03	7,30E-03	2,93E-07		4,12E-03	1,11E-02	3,93E-05
									9,58E-03	3,76E-03	7,25E-03	2,88E-07		4,09E-03	1,11E-02	3,91E-05
									9,69E-03	3,74E-03	7,21E-03	2,83E-07		4,07E-03	1,10E-02	3,88E-05
									9,80E-03	3,71E-03	7,16E-03	2,78E-07		4,04E-03	1,09E-02	3,86E-05
									9,91E-03	3,69E-03	7,12E-03	2,73E-07		4,02E-03	1,09E-02	3,84E-05
									1,00E-02	3,67E-03	7,07E-03	2,68E-07		3,99E-03	1,08E-02	3,81E-05
									1,01E-02	3,64E-03	7,03E-03	2,64E-07		3,97E-03	1,07E-02	3,79E-05
									1,03E-02	3,62E-03	6,98E-03	2,59E-07		3,94E-03	1,07E-02	3,77E-05
									1,04E-02	3,60E-03	6,94E-03	2,55E-07		3,91E-03	1,06E-02	3,75E-05
									1,05E-02	3,57E-03	6,90E-03	2,51E-07		3,89E-03	1,05E-02	3,72E-05
									1,06E-02	3,55E-03	6,86E-03	2,46E-07		3,87E-03	1,05E-02	3,70E-05
									1,07E-02	3,53E-03	6,81E-03	2,42E-07		3,84E-03	1,04E-02	3,68E-05
									1,09E-02	3,51E-03	6,77E-03	2,38E-07		3,82E-03	1,03E-02	3,66E-05
									1,10E-02	3,48E-03	6,73E-03	2,34E-07		3,79E-03	1,03E-02	3,64E-05
									1,11E-02	3,46E-03	6,69E-03	2,30E-07		3,77E-03	1,02E-02	3,61E-05
									1,13E-02	3,44E-03	6,65E-03	2,26E-07		3,74E-03	1,01E-02	3,59E-05
									1,14E-02	3,42E-03	6,60E-03	2,22E-07		3,72E-03	1,01E-02	3,57E-05
									1,15E-02	3,40E-03	6,56E-03	2,18E-07		3,70E-03	1,00E-02	3,55E-05
									1,17E-02	3,37E-03	6,52E-03	2,14E-07		3,67E-03	9,96E-03	3,53E-05
									1,18E-02	3,35E-03	6,48E-03	2,11E-07		3,65E-03	9,90E-03	3,51E-05
									1,19E-02	3,33E-03	6,44E-03	2,07E-07		3,63E-03	9,84E-03	3,49E-05
									1,21E-02	3,31E-03	6,40E-03	2,04E-07		3,60E-03	9,78E-03	3,47E-05
									1,22E-02	3,29E-03	6,36E-03	2,00E-07		3,58E-03	9,72E-03	3,45E-05
									1,23E-02	3,27E-03	6,32E-03	1,97E-07		3,56E-03	9,66E-03	3,43E-05
									1,25E-02	3,25E-03	6,28E-03	1,93E-07		3,53E-03	9,61E-03	3,41E-05
									1,26E-02	3,23E-03	6,25E-03	1,90E-07		3,51E-03	9,55E-03	3,39E-05
									1,28E-02	3,21E-03	6,21E-03	1,87E-07		3,49E-03	9,49E-03	3,36E-05
									1,29E-02	3,19E-03	6,17E-03	1,84E-07		3,47E-03	9,43E-03	3,35E-05
									1,31E-02	3,17E-03	6,13E-03	1,80E-07		3,45E-03	9,37E-03	3,33E-05
									1,32E-02	3,15E-03	6,09E-03	1,77E-07		3,42E-03	9,32E-03	3,31E-05
									1,34E-02	3,13E-03	6,06E-03	1,74E-07		3,40E-03	9,26E-03	3,29E-05
									1,35E-02	3,11E-03	6,02E-03	1,71E-07		3,38E-03	9,20E-03	3,27E-05
									1,37E-02	3,09E-03	5,98E-03	1,68E-07		3,36E-03	9,15E-03	3,25E-05
									1,38E-02	3,07E-03	5,94E-03	1,66E-07		3,34E-03	9,09E-03	3,23E-05
									1,40E-02	3,05E-03	5,91E-03	1,63E-07		3,32E-03	9,04E-03	3,21E-05
									1,42E-02	3,03E-03	5,87E-03	1,60E-07		3,30E-03	8,98E-03	3,19E-05
									1,43E-02	3,01E-03	5,84E-03	1,57E-07		3,28E-03	8,93E-03	3,17E-05
									1,45E-02	2,99E-03	5,80E-03	1,54E-07		3,25E-03	8,88E-03	3,15E-05
									1,47E-02	2,98E-03	5,77E-03	1,52E-07		3,23E-03	8,82E-03	3,13E-05
									1,48E-02	2,96E-03	5,73E-03	1,49E-07		3,21E-03	8,77E-03	3,12E-05
									1,50E-02	2,94E-03	5,69E-03	1,47E-07		3,19E-03	8,72E-03	3,10E-05
									1,52E-02	2,92E-03	5,66E-03	1,44E-07		3,17E-03	8,66E-03	3,08E-05
									1,54E-02	2,90E-03	5,63E-03	1,42E-07		3,15E-03	8,61E-03	3,06E-05
									1,55E-02	2,88E-03	5,59E-03	1,39E-07		3,13E-03	8,56E-03	3,04E-05
									1,57E-02	2,87E-03	5,56E-03	1,37E-07		3,11E-03	8,51E-03	3,02E-05
									1,59E-02	2,85E-03	5,52E-03	1,35E-07		3,09E-03	8,46E-03	3,01E-05
									1,61E-02	2,83E-03	5,49E-03	1,32E-07		3,07E-03	8,41E-03	2,99E-05
									1,63E-02	2,81E-03	5,46E-03	1,30E-07		3,06E-03	8,36E-03	2,97E-05
									1,65E-02	2,80E-03	5,42E-03	1,28E-07		3,04E-03	8,30E-03	2,95E-05
									1,67E-02	2,78E-03	5,39E-03	1,26E-07		3,02E-03	8,25E-03	2,94E-05
									1,68E-02	2,76E-03	5,36E-03	1,23E-07		3,00E-03	8,21E-03	2,92E-05
									1,70E-02	2,74E-03	5,32E-03	1,21E-07		2,98E-03	8,16E-03	2,90E-05
									1,72E-02	2,73E-03	5,29E-03	1,19E-07		2,96E-03	8,11E-03	2,89E-05
									1,74E-02	2,71E-03	5,26E-03	1,17E-07		2,94E-03	8,06E-03	2,87E-05
									1,76E-02	2,69E-03	5,23E-03	1,15E-07		2,92E-03	8,01E-03	2,85E-05
									1,78E-02	2,68E-03	5,20E-03	1,13E-07		2,91E-03	7,96E-03	2,83E-05
									1,81E-02	2,66E-03	5,17E-03	1,11E-07		2,89E-03	7,91E-03	2,82E-05
									1,83E-02	2,64E-03	5,13E-03	1,09E-07		2,87E-03	7,87E-03	2,80E-05
									1,85E-02	2,63E-03	5,10E-03	1,07E-07		2,85E-03	7,82E-03	2,79E-05
									1,87E-02	2,61E-03	5,07E-03	1,06E-07		2,83E-03	7,77E-03	2,77E-05
									1,89E-02	2,59E-03	5,04E-03	1,04E-07		2,82E-03	7,73E-03	2,75E-05
									1,91E-02	2,58E-03	5,01E-03	1,02E-07		2,80E-03	7,68E-03	2,74E-05
									1,93E-02	2,56E-03	4,98E-03	1,00E-07		2,78E-03	7,63E-03	2,72E-05
									1,96E-02	2,55E-03	4,95E-03	9,86E-08		2,76E-03	7,59E-03	2,70E-05
									1,98E-02	2,53E-03	4,92E-03	9,69E-08		2,75E-03	7,54E-03	2,69E-05
									2,00E-02	2,52E-03	4,89E-03	9,52E-08		2,73E-03	7,50E-03	2,67E-05
									2,03E-02	2,50E-03	4,86E-03	9,36E-08		2,71E-03	7,45E-03	2,66E-05
									2,05E-02	2,49E-03	4,83E-03	9,20E-08		2,70E-03	7,41E-03	2,64E-05
									2,07E-02	2,47E-03	4,80E-03	9,04E-08		2,68E-03	7,36E-03	2,63E-05
									2,10E-02	2,45E-03	4,77E-03	8,89E-08		2,66E-03	7,32E-03	2,61E-05
									2,12E-02	2,44E-03	4,75E-03	8,73E-08		2,65E-03	7,28E-03	2,60E-05
									2,15E-02	2,42E-03	4,72E-03	8,58E-08		2,63E-03	7,23E-03	2,58E-05
									2,17E-02	2,41E-03	4,69E-03	8,44E-08		2,61E-03	7,19E-03	2,57E-05
									2,20E-02	2,39E-03	4,66E-03	8,29E-08		2,60E-03	7,15E-03	2,55E-05
									2,22E-02	2,38E-03	4,63E-03	8,15E-08		2,58E-03	7,11E-03	2,54E-05
									2,25E-02	2,37E-03	4,60E-03	8,01E-08		2,56E-03	7,06E-03	2,52E-05
									2,27E-02	2,35E-03	4,58E-03	7,87E-08		2,55E-03	7,02E-03	2,51E-05
									2,30E-02	2,34E-03	4,55E-03	7,74E-08		2,53E-03	6,98E-03	2,49E-05
									2,33E-02	2,32E-03	4,52E-03	7,61E-08		2,52E-03	6,94E-03	2,48E-05
									2,35E-02	2,31E-03	4,49E-03	7,48E-08		2,50E-03	6,90E-03	2,46E-05
									2,38E-02	2,29E-03	4,47E-03	7,35E-08		2,49E-03	6,86E-03	2,45E-05
									2,41E-02	2,28E-03	4,44E-03	7,22E-08		2,47E-03	6,82E-03	2,43E-05
									2,44E-02	2,27E-03	4,41E-03	7,10E-08		2,46E-03	6,77E-03	2,42E-05
									2,46E-02	2,25E-03	4,39E-03	6,98E-08		2,44E-03	6,73E-03	2,41E-05
									2,49E-02	2,24E-03	4,36E-03	6,86E-08		2,43E-03	6,69E-03	2,39E-05
									2,52E-02	2,23E-03	4,34E-03	6,74E-08		2,41E-03	6,65E-03	2,38E-05
									2,55E-02	2,21E-03	4,31E-03	6,62E-08		2,40E-03	6,62E-03	2,36E-05
									2,58E-02	2,20E-03	4,28E-03	6,51E-08		2,38E-03	6,58E-03	2,35E-05
									2,61E-02	2,18E-03	4,26E-03	6,40E-08		2,37E-03	6,54E-03	2,34E-05
									2,64E-02	2,17E-03	4,23E-03	6,29E-08		2,35E-03	6,50E-03	2,32E-05
									2,67E-02	2,16E-03	4,21E-03	6,18E-08		2,34E-03	6,46E-03	2,31E-05
									2,70E-02	2,14E-03	4,18E-03	6,08E-08		2,32E-03	6,42E-03	2,30E-05
									2,73E-02	2,13E-03	4,16E-03	5,97E-08		2,31E-03	6,38E-03	2,28E-05
									2,77E-02	2,12E-03	4,13E-03	5,87E-08		2,29E-03	6,35E-03	2,27E-05
									2,80E-02	2,11E-03	4,11E-03	5,77E-08		2,28E-03	6,31E-03	2,26E-05
									2,83E-02	2,09E-03	4,08E-03	5,67E-08		2,27E-03	6,27E-03	2,24E-05
									2,86E-02	2,08E-03	4,06E-03	5,57E-08		2,25E-03	6,23E-03	2,23E-05
									2,90E-02	2,07E-03	4,03E-03	5,48E-08		2,24E-03	6,20E-03	2,22E-05
									2,93E-02	2,06E-03	4,01E-03	5,38E-08		2,23E-03	6,16E-03	2,20E-05
									2,96E-02	2,04E-03	3,99E-03	5,29E-08		2,21E-03	6,12E-03	2,19E-05
									3,00E-02	2,03E-03	3,96E-03	5,20E-08		2,20E-03	6,09E-03	2,18E-05
									3,03E-02	2,02E-03	3,94E-03	5,11E-08		2,18E-03	6,05E-03	2,17E-05
									3,07E-02	2,01E-03	3,92E-03	5,02E-08		2,17E-03	6,02E-03	2,15E-05
									3,10E-02	1,99E-03	3,89E-03	4,94E-08		2,16E-03	5,98E-03	2,14E-05
									3,14E-02	1,98E-03	3,87E-03	4,85E-08		2,14E-03	5,95E-03	2,13E-05
									3,18E-02	1,97E-03	3,85E-03	4,77E-08		2,13E-03	5,91E-03	2,12E-05
									3,21E-02	1,96E-03	3,82E-03	4,69E-08		2,12E-03	5,88E-03	2,10E-05
									3,25E-02	1,95E-03	3,80E-03	4,61E-08		2,11E-03	5,84E-03	2,09E-05
									3,29E-02	1,93E-03	3,78E-03	4,53E-08		2,09E-03	5,81E-03	2,08E-05
									3,33E-02	1,92E-03	3,76E-03	4,45E-08		2,08E-03	5,77E-03	2,07E-05
									3,36E-02	1,91E-03	3,73E-03	4,38E-08		2,07E-03	5,74E-03	2,05E-05
									3,40E-02	1,90E-03	3,71E-03	4,30E-08		2,05E-03	5,70E-03	2,04E-05
									3,44E-02	1,89E-03	3,69E-03	4,23E-08		2,04E-03	5,67E-03	2,03E-05
									3,48E-02	1,88E-03	3,67E-03	4,15E-08		2,03E-03	5,64E-03	2,02E-05
									3,52E-02	1,87E-03	3,65E-03	4,08E-08		2,02E-03	5,60E-03	2,01E-05
									3,56E-02	1,85E-03	3,62E-03	4,01E-08		2,01E-03	5,57E-03	2,00E-05
									3,60E-02	1,84E-03	3,60E-03	3,94E-08		1,99E-03	5,54E-03	1,98E-05
									3,65E-02	1,83E-03	3,58E-03	3,88E-08		1,98E-03	5,51E-03	1,97E-05
									3,69E-02	1,82E-03	3,56E-03	3,81E-08		1,97E-03	5,47E-03	1,96E-05
									3,73E-02	1,81E-03	3,54E-03	3,74E-08		1,96E-03	5,44E-03	1,95E-05
									3,77E-02	1,80E-03	3,52E-03	3,68E-08		1,95E-03	5,41E-03	1,94E-05
									3,82E-02	1,79E-03	3,50E-03	3,62E-08		1,93E-03	5,38E-03	1,93E-05
									3,86E-02	1,78E-03	3,48E-03	3,56E-08		1,92E-03	5,35E-03	1,92E-05
									3,91E-02	1,77E-03	3,46E-03	3,49E-08		1,91E-03	5,31E-03	1,90E-05
									3,95E-02	1,76E-03	3,44E-03	3,43E-08		1,90E-03	5,28E-03	1,89E-05
									4,00E-02	1,75E-03	3,42E-03	3,38E-08		1,89E-03	5,25E-03	1,88E-05
									4,04E-02	1,74E-03	3,40E-03	3,32E-08		1,88E-03	5,22E-03	1,87E-05
									4,09E-02	1,73E-03	3,38E-03	3,26E-08		1,86E-03	5,19E-03	1,86E-05
									4,14E-02	1,72E-03	3,36E-03	3,21E-08		1,85E-03	5,16E-03	1,85E-05
									4,19E-02	1,70E-03	3,34E-03	3,15E-08		1,84E-03	5,13E-03	1,84E-05
									4,24E-02	1,69E-03	3,32E-03	3,10E-08		1,83E-03	5,10E-03	1,83E-05
									4,28E-02	1,68E-03	3,30E-03	3,04E-08		1,82E-03	5,07E-03	1,82E-05
									4,33E-02	1,67E-03	3,28E-03	2,99E-08		1,81E-03	5,04E-03	1,81E-05
									4,38E-02	1,66E-03	3,26E-03	2,94E-08		1,80E-03	5,01E-03	1,80E-05
									4,44E-02	1,65E-03	3,24E-03	2,89E-08		1,79E-03	4,98E-03	1,79E-05
									4,49E-02	1,64E-03	3,22E-03	2,84E-08		1,78E-03	4,95E-03	1,78E-05
									4,54E-02	1,63E-03	3,20E-03	2,79E-08		1,77E-03	4,92E-03	1,77E-05
									4,59E-02	1,63E-03	3,18E-03	2,74E-08		1,76E-03	4,89E-03	1,76E-05
									4,64E-02	1,62E-03	3,16E-03	2,70E-08		1,74E-03	4,87E-03	1,75E-05
									4,70E-02	1,61E-03	3,15E-03	2,65E-08		1,73E-03	4,84E-03	1,74E-05
									4,75E-02	1,60E-03	3,13E-03	2,61E-08		1,72E-03	4,81E-03	1,73E-05
									4,81E-02	1,59E-03	3,11E-03	2,56E-08		1,71E-03	4,78E-03	1,72E-05
									4,86E-02	1,58E-03	3,09E-03	2,52E-08		1,70E-03	4,75E-03	1,71E-05
									4,92E-02	1,57E-03	3,07E-03	2,47E-08		1,69E-03	4,73E-03	1,70E-05
									4,98E-02	1,56E-03	3,05E-03	2,43E-08		1,68E-03	4,70E-03	1,69E-05
									5,03E-02	1,55E-03	3,04E-03	2,39E-08		1,67E-03	4,67E-03	1,68E-05
									5,09E-02	1,54E-03	3,02E-03	2,35E-08		1,66E-03	4,64E-03	1,67E-05
									5,15E-02	1,53E-03	3,00E-03	2,31E-08		1,65E-03	4,62E-03	1,66E-05
									5,21E-02	1,52E-03	2,98E-03	2,27E-08		1,64E-03	4,59E-03	1,65E-05
									5,27E-02	1,51E-03	2,97E-03	2,23E-08		1,63E-03	4,56E-03	1,64E-05
									5,33E-02	1,50E-03	2,95E-03	2,19E-08		1,62E-03	4,54E-03	1,63E-05
									5,40E-02	1,49E-03	2,93E-03	2,15E-08		1,61E-03	4,51E-03	1,62E-05
									5,46E-02	1,49E-03	2,91E-03	2,12E-08		1,60E-03	4,48E-03	1,61E-05
									5,52E-02	1,48E-03	2,90E-03	2,08E-08		1,59E-03	4,46E-03	1,60E-05
									5,58E-02	1,47E-03	2,88E-03	2,05E-08		1,58E-03	4,43E-03	1,59E-05
									5,65E-02	1,46E-03	2,86E-03	2,01E-08		1,58E-03	4,40E-03	1,58E-05
									5,72E-02	1,45E-03	2,85E-03	1,98E-08		1,57E-03	4,38E-03	1,57E-05
									5,78E-02	1,44E-03	2,83E-03	1,94E-08		1,56E-03	4,35E-03	1,56E-05
									5,85E-02	1,43E-03	2,81E-03	1,91E-08		1,55E-03	4,33E-03	1,55E-05
									5,92E-02	1,43E-03	2,80E-03	1,88E-08		1,54E-03	4,30E-03	1,55E-05
									5,98E-02	1,42E-03	2,78E-03	1,84E-08		1,53E-03	4,28E-03	1,54E-05
									6,05E-02	1,41E-03	2,76E-03	1,81E-08		1,52E-03	4,25E-03	1,53E-05
									6,12E-02	1,40E-03	2,75E-03	1,78E-08		1,51E-03	4,23E-03	1,52E-05
									6,20E-02	1,39E-03	2,73E-03	1,75E-08		1,50E-03	4,20E-03	1,51E-05
									6,27E-02	1,38E-03	2,72E-03	1,72E-08		1,49E-03	4,18E-03	1,50E-05
									6,34E-02	1,38E-03	2,70E-03	1,69E-08		1,48E-03	4,15E-03	1,49E-05
									6,41E-02	1,37E-03	2,68E-03	1,66E-08		1,48E-03	4,13E-03	1,48E-05
									6,49E-02	1,36E-03	2,67E-03	1,63E-08		1,47E-03	4,11E-03	1,48E-05
									6,56E-02	1,35E-03	2,65E-03	1,61E-08		1,46E-03	4,08E-03	1,47E-05
									6,64E-02	1,34E-03	2,64E-03	1,58E-08		1,45E-03	4,06E-03	1,46E-05
									6,72E-02	1,34E-03	2,62E-03	1,55E-08		1,44E-03	4,04E-03	1,45E-05
									6,79E-02	1,33E-03	2,61E-03	1,52E-08		1,43E-03	4,01E-03	1,44E-05
									6,87E-02	1,32E-03	2,59E-03	1,50E-08		1,42E-03	3,99E-03	1,43E-05
									6,95E-02	1,31E-03	2,58E-03	1,47E-08		1,41E-03	3,97E-03	1,42E-05
									7,03E-02	1,30E-03	2,56E-03	1,45E-08		1,41E-03	3,94E-03	1,42E-05
									7,11E-02	1,30E-03	2,55E-03	1,42E-08		1,40E-03	3,92E-03	1,41E-05
									7,20E-02	1,29E-03	2,53E-03	1,40E-08		1,39E-03	3,90E-03	1,40E-05
									7,28E-02	1,28E-03	2,52E-03	1,37E-08		1,38E-03	3,87E-03	1,39E-05
									7,36E-02	1,27E-03	2,50E-03	1,35E-08		1,37E-03	3,85E-03	1,38E-05
									7,45E-02	1,27E-03	2,49E-03	1,33E-08		1,37E-03	3,83E-03	1,38E-05
									7,54E-02	1,26E-03	2,47E-03	1,30E-08		1,36E-03	3,81E-03	1,37E-05
									7,62E-02	1,25E-03	2,46E-03	1,28E-08		1,35E-03	3,78E-03	1,36E-05
									7,71E-02	1,24E-03	2,44E-03	1,26E-08		1,34E-03	3,76E-03	1,35E-05
									7,80E-02	1,24E-03	2,43E-03	1,24E-08		1,33E-03	3,74E-03	1,34E-05
									7,89E-02	1,23E-03	2,41E-03	1,22E-08		1,33E-03	3,72E-03	1,34E-05
									7,98E-02	1,22E-03	2,40E-03	1,20E-08		1,32E-03	3,70E-03	1,33E-05
									8,08E-02	1,22E-03	2,39E-03	1,18E-08		1,31E-03	3,68E-03	1,32E-05
									8,17E-02	1,21E-03	2,37E-03	1,16E-08		1,30E-03	3,65E-03	1,31E-05
									8,26E-02	1,20E-03	2,36E-03	1,14E-08		1,29E-03	3,63E-03	1,31E-05
									8,36E-02	1,19E-03	2,35E-03	1,12E-08		1,29E-03	3,61E-03	1,30E-05
									8,46E-02	1,19E-03	2,33E-03	1,10E-08		1,28E-03	3,59E-03	1,29E-05
									8,55E-02	1,18E-03	2,32E-03	1,08E-08		1,27E-03	3,57E-03	1,28E-05
									8,65E-02	1,17E-03	2,30E-03	1,06E-08		1,26E-03	3,55E-03	1,28E-05
									8,75E-02	1,17E-03	2,29E-03	1,04E-08		1,26E-03	3,53E-03	1,27E-05
									8,86E-02	1,16E-03	2,28E-03	1,02E-08		1,25E-03	3,51E-03	1,26E-05
									8,96E-02	1,15E-03	2,26E-03	1,01E-08		1,24E-03	3,49E-03	1,25E-05
									9,06E-02	1,15E-03	2,25E-03	9,90E-09		1,23E-03	3,47E-03	1,25E-05
									9,17E-02	1,14E-03	2,24E-03	9,73E-09		1,23E-03	3,45E-03	1,24E-05
									9,27E-02	1,13E-03	2,23E-03	9,56E-09		1,22E-03	3,43E-03	1,23E-05
									9,38E-02	1,13E-03	2,21E-03	9,40E-09		1,21E-03	3,41E-03	1,23E-05
									9,49E-02	1,12E-03	2,20E-03	9,23E-09		1,21E-03	3,39E-03	1,22E-05
									9,60E-02	1,11E-03	2,19E-03	9,08E-09		1,20E-03	3,37E-03	1,21E-05
									9,71E-02	1,11E-03	2,17E-03	8,92E-09		1,19E-03	3,35E-03	1,20E-05
									9,82E-02	1,10E-03	2,16E-03	8,77E-09		1,18E-03	3,33E-03	1,20E-05
									9,94E-02	1,09E-03	2,15E-03	8,62E-09		1,18E-03	3,31E-03	1,19E-05
									1,01E-01	1,09E-03	2,14E-03	8,47E-09		1,17E-03	3,29E-03	1,18E-05
									1,02E-01	1,08E-03	2,12E-03	8,33E-09		1,16E-03	3,27E-03	1,18E-05
									1,03E-01	1,07E-03	2,11E-03	8,18E-09		1,16E-03	3,25E-03	1,17E-05
									1,04E-01	1,07E-03	2,10E-03	8,04E-09		1,15E-03	3,23E-03	1,16E-05
									1,05E-01	1,06E-03	2,09E-03	7,90E-09		1,14E-03	3,22E-03	1,16E-05
									1,06E-01	1,06E-03	2,08E-03	7,77E-09		1,14E-03	3,20E-03	1,15E-05
									1,08E-01	1,05E-03	2,06E-03	7,64E-09		1,13E-03	3,18E-03	1,14E-05
									1,09E-01	1,04E-03	2,05E-03	7,51E-09		1,12E-03	3,16E-03	1,14E-05
									1,10E-01	1,04E-03	2,04E-03	7,38E-09		1,12E-03	3,14E-03	1,13E-05
									1,12E-01	1,03E-03	2,03E-03	7,25E-09		1,11E-03	3,12E-03	1,12E-05
									1,13E-01	1,02E-03	2,02E-03	7,13E-09		1,10E-03	3,11E-03	1,12E-05
									1,14E-01	1,02E-03	2,00E-03	7,00E-09		1,10E-03	3,09E-03	1,11E-05
									1,15E-01	1,01E-03	1,99E-03	6,88E-09		1,09E-03	3,07E-03	1,10E-05
									1,17E-01	1,01E-03	1,98E-03	6,77E-09		1,08E-03	3,05E-03	1,10E-05
									1,18E-01	1,00E-03	1,97E-03	6,65E-09		1,08E-03	3,03E-03	1,09E-05
									1,19E-01	9,95E-04	1,96E-03	6,54E-09		1,07E-03	3,02E-03	1,09E-05
									1,21E-01	9,89E-04	1,95E-03	6,42E-09		1,07E-03	3,00E-03	1,08E-05
									1,22E-01	9,84E-04	1,94E-03	6,31E-09		1,06E-03	2,98E-03	1,07E-05
									1,24E-01	9,78E-04	1,92E-03	6,21E-09		1,05E-03	2,96E-03	1,07E-05
									1,25E-01	9,72E-04	1,91E-03	6,10E-09		1,05E-03	2,95E-03	1,06E-05
									1,27E-01	9,67E-04	1,90E-03	5,99E-09		1,04E-03	2,93E-03	1,05E-05
									1,28E-01	9,61E-04	1,89E-03	5,89E-09		1,03E-03	2,91E-03	1,05E-05
									1,30E-01	9,55E-04	1,88E-03	5,79E-09		1,03E-03	2,90E-03	1,04E-05
									1,31E-01	9,50E-04	1,87E-03	5,69E-09		1,02E-03	2,88E-03	1,04E-05
									1,33E-01	9,44E-04	1,86E-03	5,59E-09		1,02E-03	2,86E-03	1,03E-05
									1,34E-01	9,39E-04	1,85E-03	5,50E-09		1,01E-03	2,85E-03	1,02E-05
									1,36E-01	9,33E-04	1,84E-03	5,40E-09		1,00E-03	2,83E-03	1,02E-05
									1,37E-01	9,28E-04	1,83E-03	5,31E-09		9,99E-04	2,81E-03	1,01E-05
									1,39E-01	9,22E-04	1,82E-03	5,22E-09		9,93E-04	2,80E-03	1,01E-05
									1,40E-01	9,17E-04	1,80E-03	5,13E-09		9,87E-04	2,78E-03	1,00E-05
									1,42E-01	9,12E-04	1,79E-03	5,04E-09		9,81E-04	2,76E-03	9,95E-06
									1,44E-01	9,06E-04	1,78E-03	4,96E-09		9,76E-04	2,75E-03	9,90E-06
									1,45E-01	9,01E-04	1,77E-03	4,87E-09		9,70E-04	2,73E-03	9,84E-06
									1,47E-01	8,96E-04	1,76E-03	4,79E-09		9,64E-04	2,72E-03	9,78E-06
									1,49E-01	8,91E-04	1,75E-03	4,71E-09		9,59E-04	2,70E-03	9,73E-06
									1,50E-01	8,85E-04	1,74E-03	4,63E-09		9,53E-04	2,69E-03	9,67E-06
									1,52E-01	8,80E-04	1,73E-03	4,55E-09		9,48E-04	2,67E-03	9,61E-06
									1,54E-01	8,75E-04	1,72E-03	4,47E-09		9,42E-04	2,65E-03	9,56E-06
									1,56E-01	8,70E-04	1,71E-03	4,39E-09		9,37E-04	2,64E-03	9,50E-06
									1,58E-01	8,65E-04	1,70E-03	4,32E-09		9,31E-04	2,62E-03	9,45E-06
									1,59E-01	8,60E-04	1,69E-03	4,24E-09		9,26E-04	2,61E-03	9,39E-06
									1,61E-01	8,55E-04	1,68E-03	4,17E-09		9,20E-04	2,59E-03	9,34E-06
									1,63E-01	8,50E-04	1,67E-03	4,10E-09		9,15E-04	2,58E-03	9,29E-06
									1,65E-01	8,45E-04	1,66E-03	4,03E-09		9,10E-04	2,56E-03	9,23E-06
									1,67E-01	8,40E-04	1,65E-03	3,96E-09		9,04E-04	2,55E-03	9,18E-06
									1,69E-01	8,35E-04	1,64E-03	3,89E-09		8,99E-04	2,53E-03	9,13E-06
									1,71E-01	8,30E-04	1,64E-03	3,82E-09		8,94E-04	2,52E-03	9,07E-06
									1,73E-01	8,26E-04	1,63E-03	3,76E-09		8,89E-04	2,51E-03	9,02E-06
									1,75E-01	8,21E-04	1,62E-03	3,69E-09		8,83E-04	2,49E-03	8,97E-06
									1,77E-01	8,16E-04	1,61E-03	3,63E-09		8,78E-04	2,48E-03	8,92E-06
									1,79E-01	8,11E-04	1,60E-03	3,57E-09		8,73E-04	2,46E-03	8,87E-06
									1,81E-01	8,07E-04	1,59E-03	3,51E-09		8,68E-04	2,45E-03	8,82E-06
									1,83E-01	8,02E-04	1,58E-03	3,45E-09		8,63E-04	2,43E-03	8,76E-06
									1,85E-01	7,97E-04	1,57E-03	3,39E-09		8,58E-04	2,42E-03	8,71E-06
									1,87E-01	7,93E-04	1,56E-03	3,33E-09		8,53E-04	2,41E-03	8,66E-06
									1,89E-01	7,88E-04	1,55E-03	3,27E-09		8,48E-04	2,39E-03	8,61E-06
									1,92E-01	7,83E-04	1,54E-03	3,22E-09		8,43E-04	2,38E-03	8,56E-06
									1,94E-01	7,79E-04	1,53E-03	3,16E-09		8,38E-04	2,36E-03	8,52E-06
									1,96E-01	7,74E-04	1,53E-03	3,11E-09		8,33E-04	2,35E-03	8,47E-06
									1,98E-01	7,70E-04	1,52E-03	3,05E-09		8,28E-04	2,34E-03	8,42E-06
									2,01E-01	7,65E-04	1,51E-03	3,00E-09		8,24E-04	2,32E-03	8,37E-06
									2,03E-01	7,61E-04	1,50E-03	2,95E-09		8,19E-04	2,31E-03	8,32E-06
									2,05E-01	7,57E-04	1,49E-03	2,90E-09		8,14E-04	2,30E-03	8,27E-06
									2,08E-01	7,52E-04	1,48E-03	2,85E-09		8,09E-04	2,28E-03	8,23E-06
									2,10E-01	7,48E-04	1,47E-03	2,80E-09		8,05E-04	2,27E-03	8,18E-06
									2,13E-01	7,43E-04	1,46E-03	2,75E-09		8,00E-04	2,26E-03	8,13E-06
									2,15E-01	7,39E-04	1,46E-03	2,71E-09		7,95E-04	2,24E-03	8,08E-06
									2,18E-01	7,35E-04	1,45E-03	2,66E-09		7,91E-04	2,23E-03	8,04E-06
									2,20E-01	7,31E-04	1,44E-03	2,61E-09		7,86E-04	2,22E-03	7,99E-06
									2,23E-01	7,26E-04	1,43E-03	2,57E-09		7,82E-04	2,21E-03	7,95E-06
									2,25E-01	7,22E-04	1,42E-03	2,53E-09		7,77E-04	2,19E-03	7,90E-06
									2,28E-01	7,18E-04	1,41E-03	2,48E-09		7,72E-04	2,18E-03	7,85E-06
									2,30E-01	7,14E-04	1,41E-03	2,44E-09		7,68E-04	2,17E-03	7,81E-06
									2,33E-01	7,10E-04	1,40E-03	2,40E-09		7,64E-04	2,16E-03	7,76E-06
									2,36E-01	7,06E-04	1,39E-03	2,36E-09		7,59E-04	2,14E-03	7,72E-06
									2,39E-01	7,01E-04	1,38E-03	2,32E-09		7,55E-04	2,13E-03	7,67E-06
									2,41E-01	6,97E-04	1,37E-03	2,28E-09		7,50E-04	2,12E-03	7,63E-06
									2,44E-01	6,93E-04	1,37E-03	2,24E-09		7,46E-04	2,11E-03	7,59E-06
									2,47E-01	6,89E-04	1,36E-03	2,20E-09		7,42E-04	2,09E-03	7,54E-06
									2,50E-01	6,85E-04	1,35E-03	2,16E-09		7,37E-04	2,08E-03	7,50E-06
									2,53E-01	6,81E-04	1,34E-03	2,12E-09		7,33E-04	2,07E-03	7,46E-06
									2,56E-01	6,77E-04	1,33E-03	2,09E-09		7,29E-04	2,06E-03	7,41E-06
									2,59E-01	6,74E-04	1,33E-03	2,05E-09		7,25E-04	2,05E-03	7,37E-06
									2,62E-01	6,70E-04	1,32E-03	2,02E-09		7,20E-04	2,03E-03	7,33E-06
									2,65E-01	6,66E-04	1,31E-03	1,98E-09		7,16E-04	2,02E-03	7,29E-06
									2,68E-01	6,62E-04	1,30E-03	1,95E-09		7,12E-04	2,01E-03	7,24E-06
									2,71E-01	6,58E-04	1,30E-03	1,92E-09		7,08E-04	2,00E-03	7,20E-06
									2,74E-01	6,54E-04	1,29E-03	1,88E-09		7,04E-04	1,99E-03	7,16E-06
									2,77E-01	6,50E-04	1,28E-03	1,85E-09		7,00E-04	1,98E-03	7,12E-06
									2,80E-01	6,47E-04	1,27E-03	1,82E-09		6,96E-04	1,96E-03	7,08E-06
									2,84E-01	6,43E-04	1,27E-03	1,79E-09		6,92E-04	1,95E-03	7,04E-06
									2,87E-01	6,39E-04	1,26E-03	1,76E-09		6,88E-04	1,94E-03	7,00E-06
									2,90E-01	6,36E-04	1,25E-03	1,73E-09		6,84E-04	1,93E-03	6,96E-06
									2,94E-01	6,32E-04	1,25E-03	1,70E-09		6,80E-04	1,92E-03	6,92E-06
									2,97E-01	6,28E-04	1,24E-03	1,67E-09		6,76E-04	1,91E-03	6,88E-06
									3,00E-01	6,25E-04	1,23E-03	1,64E-09		6,72E-04	1,90E-03	6,84E-06
									3,04E-01	6,21E-04	1,22E-03	1,61E-09		6,68E-04	1,89E-03	6,80E-06
									3,07E-01	6,17E-04	1,22E-03	1,58E-09		6,64E-04	1,88E-03	6,76E-06
									3,11E-01	6,14E-04	1,21E-03	1,56E-09		6,60E-04	1,87E-03	6,72E-06
									3,15E-01	6,10E-04	1,20E-03	1,53E-09		6,56E-04	1,85E-03	6,68E-06
									3,18E-01	6,07E-04	1,20E-03	1,50E-09		6,53E-04	1,84E-03	6,64E-06
									3,22E-01	6,03E-04	1,19E-03	1,48E-09		6,49E-04	1,83E-03	6,61E-06
									3,26E-01	6,00E-04	1,18E-03	1,45E-09		6,45E-04	1,82E-03	6,57E-06
									3,29E-01	5,96E-04	1,18E-03	1,43E-09		6,41E-04	1,81E-03	6,53E-06
									3,33E-01	5,93E-04	1,17E-03	1,40E-09		6,38E-04	1,80E-03	6,49E-06
									3,37E-01	5,89E-04	1,16E-03	1,38E-09		6,34E-04	1,79E-03	6,45E-06
									3,41E-01	5,86E-04	1,16E-03	1,36E-09		6,30E-04	1,78E-03	6,42E-06
									3,45E-01	5,83E-04	1,15E-03	1,33E-09		6,27E-04	1,77E-03	6,38E-06
									3,49E-01	5,79E-04	1,14E-03	1,31E-09		6,23E-04	1,76E-03	6,34E-06
									3,53E-01	5,76E-04	1,14E-03	1,29E-09		6,19E-04	1,75E-03	6,31E-06
									3,57E-01	5,73E-04	1,13E-03	1,27E-09		6,16E-04	1,74E-03	6,27E-06
									3,61E-01	5,69E-04	1,12E-03	1,24E-09		6,12E-04	1,73E-03	6,24E-06
									3,65E-01	5,66E-04	1,12E-03	1,22E-09		6,09E-04	1,72E-03	6,20E-06
									3,70E-01	5,63E-04	1,11E-03	1,20E-09		6,05E-04	1,71E-03	6,16E-06
									3,74E-01	5,59E-04	1,10E-03	1,18E-09		6,02E-04	1,70E-03	6,13E-06
									3,78E-01	5,56E-04	1,10E-03	1,16E-09		5,98E-04	1,69E-03	6,09E-06
									3,83E-01	5,53E-04	1,09E-03	1,14E-09		5,95E-04	1,68E-03	6,06E-06
									3,87E-01	5,50E-04	1,08E-03	1,12E-09		5,91E-04	1,67E-03	6,02E-06
									3,92E-01	5,47E-04	1,08E-03	1,10E-09		5,88E-04	1,66E-03	5,99E-06
									3,96E-01	5,43E-04	1,07E-03	1,08E-09		5,84E-04	1,65E-03	5,95E-06
									4,01E-01	5,40E-04	1,07E-03	1,06E-09		5,81E-04	1,64E-03	5,92E-06
									4,05E-01	5,37E-04	1,06E-03	1,05E-09		5,78E-04	1,63E-03	5,89E-06
									4,10E-01	5,34E-04	1,05E-03	1,03E-09		5,74E-04	1,62E-03	5,85E-06
									4,15E-01	5,31E-04	1,05E-03	1,01E-09		5,71E-04	1,61E-03	5,82E-06
									4,20E-01	5,28E-04	1,04E-03	9,93E-10		5,68E-04	1,61E-03	5,78E-06
									4,25E-01	5,25E-04	1,04E-03	9,76E-10		5,64E-04	1,60E-03	5,75E-06
									4,29E-01	5,22E-04	1,03E-03	9,59E-10		5,61E-04	1,59E-03	5,72E-06
									4,34E-01	5,19E-04	1,02E-03	9,43E-10		5,58E-04	1,58E-03	5,69E-06
									4,39E-01	5,16E-04	1,02E-03	9,27E-10		5,55E-04	1,57E-03	5,65E-06
									4,45E-01	5,13E-04	1,01E-03	9,11E-10		5,52E-04	1,56E-03	5,62E-06
									4,50E-01	5,10E-04	1,01E-03	8,95E-10		5,48E-04	1,55E-03	5,59E-06
									4,55E-01	5,07E-04	1,00E-03	8,80E-10		5,45E-04	1,54E-03	5,56E-06
									4,60E-01	5,04E-04	9,94E-04	8,65E-10		5,42E-04	1,53E-03	5,52E-06
									4,66E-01	5,01E-04	9,88E-04	8,50E-10		5,39E-04	1,52E-03	5,49E-06
									4,71E-01	4,98E-04	9,83E-04	8,35E-10		5,36E-04	1,52E-03	5,46E-06
									4,76E-01	4,95E-04	9,77E-04	8,21E-10		5,33E-04	1,51E-03	5,43E-06
									4,82E-01	4,93E-04	9,71E-04	8,07E-10		5,30E-04	1,50E-03	5,40E-06
									4,87E-01	4,90E-04	9,66E-04	7,93E-10		5,27E-04	1,49E-03	5,37E-06
									4,93E-01	4,87E-04	9,60E-04	7,80E-10		5,24E-04	1,48E-03	5,34E-06
									4,99E-01	4,84E-04	9,55E-04	7,66E-10		5,20E-04	1,47E-03	5,31E-06
									5,05E-01	4,81E-04	9,49E-04	7,53E-10		5,17E-04	1,46E-03	5,27E-06
									5,10E-01	4,79E-04	9,44E-04	7,40E-10		5,15E-04	1,46E-03	5,24E-06
									5,16E-01	4,76E-04	9,38E-04	7,28E-10		5,12E-04	1,45E-03	5,21E-06
									5,22E-01	4,73E-04	9,33E-04	7,15E-10		5,09E-04	1,44E-03	5,18E-06
									5,28E-01	4,70E-04	9,27E-04	7,03E-10		5,06E-04	1,43E-03	5,15E-06
									5,35E-01	4,68E-04	9,22E-04	6,91E-10		5,03E-04	1,42E-03	5,13E-06
									5,41E-01	4,65E-04	9,17E-04	6,79E-10		5,00E-04	1,41E-03	5,10E-06
									5,47E-01	4,62E-04	9,12E-04	6,67E-10		4,97E-04	1,41E-03	5,07E-06
									5,53E-01	4,60E-04	9,06E-04	6,56E-10		4,94E-04	1,40E-03	5,04E-06
									5,60E-01	4,57E-04	9,01E-04	6,45E-10		4,91E-04	1,39E-03	5,01E-06
									5,66E-01	4,54E-04	8,96E-04	6,34E-10		4,88E-04	1,38E-03	4,98E-06
									5,73E-01	4,52E-04	8,91E-04	6,23E-10		4,86E-04	1,37E-03	4,95E-06
									5,79E-01	4,49E-04	8,86E-04	6,12E-10		4,83E-04	1,37E-03	4,92E-06
									5,86E-01	4,46E-04	8,80E-04	6,02E-10		4,80E-04	1,36E-03	4,89E-06
									5,93E-01	4,44E-04	8,75E-04	5,91E-10		4,77E-04	1,35E-03	4,87E-06
									6,00E-01	4,41E-04	8,70E-04	5,81E-10		4,74E-04	1,34E-03	4,84E-06
									6,07E-01	4,39E-04	8,65E-04	5,71E-10		4,72E-04	1,33E-03	4,81E-06
									6,14E-01	4,36E-04	8,60E-04	5,61E-10		4,69E-04	1,33E-03	4,78E-06
									6,21E-01	4,34E-04	8,55E-04	5,52E-10		4,66E-04	1,32E-03	4,75E-06
									6,28E-01	4,31E-04	8,51E-04	5,42E-10		4,64E-04	1,31E-03	4,73E-06
									6,35E-01	4,29E-04	8,46E-04	5,33E-10		4,61E-04	1,30E-03	4,70E-06
									6,43E-01	4,26E-04	8,41E-04	5,24E-10		4,58E-04	1,30E-03	4,67E-06
									6,50E-01	4,24E-04	8,36E-04	5,15E-10		4,56E-04	1,29E-03	4,65E-06
									6,58E-01	4,21E-04	8,31E-04	5,06E-10		4,53E-04	1,28E-03	4,62E-06
									6,65E-01	4,19E-04	8,26E-04	4,97E-10		4,50E-04	1,27E-03	4,59E-06
									6,73E-01	4,17E-04	8,22E-04	4,89E-10		4,48E-04	1,27E-03	4,57E-06
									6,81E-01	4,14E-04	8,17E-04	4,81E-10		4,45E-04	1,26E-03	4,54E-06
									6,89E-01	4,12E-04	8,12E-04	4,72E-10		4,43E-04	1,25E-03	4,51E-06
									6,97E-01	4,09E-04	8,07E-04	4,64E-10		4,40E-04	1,25E-03	4,49E-06
									7,05E-01	4,07E-04	8,03E-04	4,56E-10		4,38E-04	1,24E-03	4,46E-06
									7,13E-01	4,05E-04	7,98E-04	4,48E-10		4,35E-04	1,23E-03	4,44E-06
									7,21E-01	4,02E-04	7,94E-04	4,41E-10		4,33E-04	1,22E-03	4,41E-06
									7,30E-01	4,00E-04	7,89E-04	4,33E-10		4,30E-04	1,22E-03	4,39E-06
									7,38E-01	3,98E-04	7,84E-04	4,26E-10		4,28E-04	1,21E-03	4,36E-06
									7,47E-01	3,95E-04	7,80E-04	4,18E-10		4,25E-04	1,20E-03	4,34E-06
									7,55E-01	3,93E-04	7,75E-04	4,11E-10		4,23E-04	1,20E-03	4,31E-06
									7,64E-01	3,91E-04	7,71E-04	4,04E-10		4,20E-04	1,19E-03	4,29E-06
									7,73E-01	3,89E-04	7,67E-04	3,97E-10		4,18E-04	1,18E-03	4,26E-06
									7,82E-01	3,86E-04	7,62E-04	3,90E-10		4,15E-04	1,18E-03	4,24E-06
									7,91E-01	3,84E-04	7,58E-04	3,84E-10		4,13E-04	1,17E-03	4,21E-06
									8,00E-01	3,82E-04	7,53E-04	3,77E-10		4,11E-04	1,16E-03	4,19E-06
									8,09E-01	3,80E-04	7,49E-04	3,71E-10		4,08E-04	1,16E-03	4,16E-06
									8,19E-01	3,78E-04	7,45E-04	3,64E-10		4,06E-04	1,15E-03	4,14E-06
									8,28E-01	3,75E-04	7,40E-04	3,58E-10		4,04E-04	1,14E-03	4,12E-06
									8,38E-01	3,73E-04	7,36E-04	3,52E-10		4,01E-04	1,14E-03	4,09E-06
									8,48E-01	3,71E-04	7,32E-04	3,46E-10		3,99E-04	1,13E-03	4,07E-06
									8,57E-01	3,69E-04	7,28E-04	3,40E-10		3,97E-04	1,12E-03	4,05E-06
									8,67E-01	3,67E-04	7,24E-04	3,34E-10		3,94E-04	1,12E-03	4,02E-06
									8,77E-01	3,65E-04	7,19E-04	3,29E-10		3,92E-04	1,11E-03	4,00E-06
									8,88E-01	3,63E-04	7,15E-04	3,23E-10		3,90E-04	1,10E-03	3,98E-06
									8,98E-01	3,61E-04	7,11E-04	3,17E-10		3,88E-04	1,10E-03	3,95E-06
									9,08E-01	3,58E-04	7,07E-04	3,12E-10		3,85E-04	1,09E-03	3,93E-06
									9,19E-01	3,56E-04	7,03E-04	3,07E-10		3,83E-04	1,08E-03	3,91E-06
									9,29E-01	3,54E-04	6,99E-04	3,01E-10		3,81E-04	1,08E-03	3,89E-06
									9,40E-01	3,52E-04	6,95E-04	2,96E-10		3,79E-04	1,07E-03	3,86E-06
									9,51E-01	3,50E-04	6,91E-04	2,91E-10		3,76E-04	1,07E-03	3,84E-06
									9,62E-01	3,48E-04	6,87E-04	2,86E-10		3,74E-04	1,06E-03	3,82E-06
									9,73E-01	3,46E-04	6,83E-04	2,81E-10		3,72E-04	1,05E-03	3,80E-06
									9,85E-01	3,44E-04	6,79E-04	2,76E-10		3,70E-04	1,05E-03	3,78E-06
									9,96E-01	3,42E-04	6,75E-04	2,72E-10		3,68E-04	1,04E-03	3,75E-06
									1,01E+00	3,40E-04	6,71E-04	2,67E-10		3,66E-04	1,04E-03	3,73E-06
									1,02E+00	3,38E-04	6,67E-04	2,62E-10		3,64E-04	1,03E-03	3,71E-06
									1,03E+00	3,36E-04	6,64E-04	2,58E-10		3,62E-04	1,02E-03	3,69E-06
									1,04E+00	3,34E-04	6,60E-04	2,53E-10		3,59E-04	1,02E-03	3,67E-06
									1,06E+00	3,33E-04	6,56E-04	2,49E-10		3,57E-04	1,01E-03	3,65E-06
									1,07E+00	3,31E-04	6,52E-04	2,45E-10		3,55E-04	1,01E-03	3,63E-06
									1,08E+00	3,29E-04	6,48E-04	2,41E-10		3,53E-04	1,00E-03	3,61E-06
									1,09E+00	3,27E-04	6,45E-04	2,37E-10		3,51E-04	9,94E-04	3,58E-06
									1,10E+00	3,25E-04	6,41E-04	2,32E-10		3,49E-04	9,89E-04	3,56E-06
									1,12E+00	3,23E-04	6,37E-04	2,28E-10		3,47E-04	9,83E-04	3,54E-06
									1,13E+00	3,21E-04	6,34E-04	2,25E-10		3,45E-04	9,77E-04	3,52E-06
									1,14E+00	3,19E-04	6,30E-04	2,21E-10		3,43E-04	9,72E-04	3,50E-06
									1,16E+00	3,18E-04	6,26E-04	2,17E-10		3,41E-04	9,66E-04	3,48E-06
									1,17E+00	3,16E-04	6,23E-04	2,13E-10		3,39E-04	9,61E-04	3,46E-06
									1,18E+00	3,14E-04	6,19E-04	2,10E-10		3,37E-04	9,55E-04	3,44E-06
									1,20E+00	3,12E-04	6,16E-04	2,06E-10		3,35E-04	9,49E-04	3,42E-06
									1,21E+00	3,10E-04	6,12E-04	2,02E-10		3,33E-04	9,44E-04	3,40E-06
									1,23E+00	3,08E-04	6,09E-04	1,99E-10		3,32E-04	9,39E-04	3,38E-06
									1,24E+00	3,07E-04	6,05E-04	1,96E-10		3,30E-04	9,33E-04	3,36E-06
									1,25E+00	3,05E-04	6,02E-04	1,92E-10		3,28E-04	9,28E-04	3,35E-06
									1,27E+00	3,03E-04	5,98E-04	1,89E-10		3,26E-04	9,23E-04	3,33E-06
									1,28E+00	3,01E-04	5,95E-04	1,86E-10		3,24E-04	9,17E-04	3,31E-06
									1,30E+00	3,00E-04	5,91E-04	1,83E-10		3,22E-04	9,12E-04	3,29E-06
									1,31E+00	2,98E-04	5,88E-04	1,79E-10		3,20E-04	9,07E-04	3,27E-06
									1,33E+00	2,96E-04	5,85E-04	1,76E-10		3,18E-04	9,01E-04	3,25E-06
									1,34E+00	2,95E-04	5,81E-04	1,73E-10		3,17E-04	8,96E-04	3,23E-06
									1,36E+00	2,93E-04	5,78E-04	1,70E-10		3,15E-04	8,91E-04	3,21E-06
									1,38E+00	2,91E-04	5,74E-04	1,67E-10		3,13E-04	8,86E-04	3,19E-06
									1,39E+00	2,89E-04	5,71E-04	1,65E-10		3,11E-04	8,81E-04	3,18E-06
									1,41E+00	2,88E-04	5,68E-04	1,62E-10		3,09E-04	8,76E-04	3,16E-06
									1,42E+00	2,86E-04	5,65E-04	1,59E-10		3,08E-04	8,71E-04	3,14E-06
									1,44E+00	2,85E-04	5,61E-04	1,56E-10		3,06E-04	8,66E-04	3,12E-06
									1,46E+00	2,83E-04	5,58E-04	1,54E-10		3,04E-04	8,61E-04	3,10E-06
									1,47E+00	2,81E-04	5,55E-04	1,51E-10		3,02E-04	8,56E-04	3,09E-06
									1,49E+00	2,80E-04	5,52E-04	1,48E-10		3,01E-04	8,51E-04	3,07E-06
									1,51E+00	2,78E-04	5,49E-04	1,46E-10		2,99E-04	8,46E-04	3,05E-06
									1,53E+00	2,76E-04	5,45E-04	1,43E-10		2,97E-04	8,41E-04	3,03E-06
									1,54E+00	2,75E-04	5,42E-04	1,41E-10		2,95E-04	8,36E-04	3,02E-06
									1,56E+00	2,73E-04	5,39E-04	1,38E-10		2,94E-04	8,32E-04	3,00E-06
									1,58E+00	2,72E-04	5,36E-04	1,36E-10		2,92E-04	8,27E-04	2,98E-06
									1,60E+00	2,70E-04	5,33E-04	1,34E-10		2,90E-04	8,22E-04	2,96E-06
									1,62E+00	2,69E-04	5,30E-04	1,31E-10		2,89E-04	8,17E-04	2,95E-06
									1,63E+00	2,67E-04	5,27E-04	1,29E-10		2,87E-04	8,13E-04	2,93E-06
									1,65E+00	2,65E-04	5,24E-04	1,27E-10		2,85E-04	8,08E-04	2,91E-06
									1,67E+00	2,64E-04	5,21E-04	1,25E-10		2,84E-04	8,03E-04	2,90E-06
									1,69E+00	2,62E-04	5,18E-04	1,23E-10		2,82E-04	7,99E-04	2,88E-06
									1,71E+00	2,61E-04	5,15E-04	1,21E-10		2,80E-04	7,94E-04	2,86E-06
									1,73E+00	2,59E-04	5,12E-04	1,18E-10		2,79E-04	7,90E-04	2,85E-06
									1,75E+00	2,58E-04	5,09E-04	1,16E-10		2,77E-04	7,85E-04	2,83E-06
									1,77E+00	2,56E-04	5,06E-04	1,14E-10		2,76E-04	7,80E-04	2,81E-06
									1,79E+00	2,55E-04	5,03E-04	1,12E-10		2,74E-04	7,76E-04	2,80E-06
									1,81E+00	2,54E-04	5,00E-04	1,11E-10		2,72E-04	7,72E-04	2,78E-06
									1,83E+00	2,52E-04	4,97E-04	1,09E-10		2,71E-04	7,67E-04	2,77E-06
									1,86E+00	2,51E-04	4,95E-04	1,07E-10		2,69E-04	7,63E-04	2,75E-06
									1,88E+00	2,49E-04	4,92E-04	1,05E-10		2,68E-04	7,58E-04	2,73E-06
									1,90E+00	2,48E-04	4,89E-04	1,03E-10		2,66E-04	7,54E-04	2,72E-06
									1,92E+00	2,46E-04	4,86E-04	1,01E-10		2,65E-04	7,50E-04	2,70E-06
									1,94E+00	2,45E-04	4,83E-04	9,97E-11		2,63E-04	7,45E-04	2,69E-06
									1,97E+00	2,43E-04	4,80E-04	9,80E-11		2,62E-04	7,41E-04	2,67E-06
									1,99E+00	2,42E-04	4,78E-04	9,63E-11		2,60E-04	7,37E-04	2,66E-06
									2,01E+00	2,41E-04	4,75E-04	9,46E-11		2,59E-04	7,33E-04	2,64E-06
									2,04E+00	2,39E-04	4,72E-04	9,30E-11		2,57E-04	7,28E-04	2,63E-06
									2,06E+00	2,38E-04	4,70E-04	9,14E-11		2,56E-04	7,24E-04	2,61E-06
									2,08E+00	2,37E-04	4,67E-04	8,98E-11		2,54E-04	7,20E-04	2,60E-06
									2,11E+00	2,35E-04	4,64E-04	8,83E-11		2,53E-04	7,16E-04	2,58E-06
									2,13E+00	2,34E-04	4,61E-04	8,68E-11		2,51E-04	7,12E-04	2,57E-06
									2,16E+00	2,33E-04	4,59E-04	8,53E-11		2,50E-04	7,08E-04	2,55E-06
									2,18E+00	2,31E-04	4,56E-04	8,38E-11		2,48E-04	7,04E-04	2,54E-06
									2,21E+00	2,30E-04	4,54E-04	8,24E-11		2,47E-04	6,99E-04	2,52E-06
									2,23E+00	2,29E-04	4,51E-04	8,10E-11		2,46E-04	6,95E-04	2,51E-06
									2,26E+00	2,27E-04	4,48E-04	7,96E-11		2,44E-04	6,91E-04	2,49E-06
									2,28E+00	2,26E-04	4,46E-04	7,82E-11		2,43E-04	6,88E-04	2,48E-06
									2,31E+00	2,25E-04	4,43E-04	7,69E-11		2,41E-04	6,84E-04	2,46E-06
									2,34E+00	2,23E-04	4,41E-04	7,56E-11		2,40E-04	6,80E-04	2,45E-06
									2,36E+00	2,22E-04	4,38E-04	7,43E-11		2,39E-04	6,76E-04	2,44E-06
									2,39E+00	2,21E-04	4,36E-04	7,30E-11		2,37E-04	6,72E-04	2,42E-06
									2,42E+00	2,19E-04	4,33E-04	7,18E-11		2,36E-04	6,68E-04	2,41E-06
									2,45E+00	2,18E-04	4,31E-04	7,05E-11		2,35E-04	6,64E-04	2,39E-06
									2,48E+00	2,17E-04	4,28E-04	6,93E-11		2,33E-04	6,60E-04	2,38E-06
									2,50E+00	2,16E-04	4,26E-04	6,81E-11		2,32E-04	6,57E-04	2,37E-06
									2,53E+00	2,14E-04	4,23E-04	6,70E-11		2,31E-04	6,53E-04	2,35E-06
									2,56E+00	2,13E-04	4,21E-04	6,58E-11		2,29E-04	6,49E-04	2,34E-06
									2,59E+00	2,12E-04	4,18E-04	6,47E-11		2,28E-04	6,45E-04	2,33E-06
									2,62E+00	2,11E-04	4,16E-04	6,36E-11		2,27E-04	6,42E-04	2,31E-06
									2,65E+00	2,10E-04	4,14E-04	6,25E-11		2,25E-04	6,38E-04	2,30E-06
									2,68E+00	2,08E-04	4,11E-04	6,14E-11		2,24E-04	6,34E-04	2,29E-06
									2,71E+00	2,07E-04	4,09E-04	6,04E-11		2,23E-04	6,31E-04	2,27E-06
									2,75E+00	2,06E-04	4,06E-04	5,93E-11		2,21E-04	6,27E-04	2,26E-06
									2,78E+00	2,05E-04	4,04E-04	5,83E-11		2,20E-04	6,23E-04	2,25E-06
									2,81E+00	2,04E-04	4,02E-04	5,73E-11		2,19E-04	6,20E-04	2,23E-06
									2,84E+00	2,02E-04	4,00E-04	5,63E-11		2,18E-04	6,16E-04	2,22E-06
									2,88E+00	2,01E-04	3,97E-04	5,54E-11		2,16E-04	6,13E-04	2,21E-06
									2,91E+00	2,00E-04	3,95E-04	5,44E-11		2,15E-04	6,09E-04	2,20E-06
									2,94E+00	1,99E-04	3,93E-04	5,35E-11		2,14E-04	6,06E-04	2,18E-06
									2,98E+00	1,98E-04	3,90E-04	5,26E-11		2,13E-04	6,02E-04	2,17E-06
									3,01E+00	1,97E-04	3,88E-04	5,17E-11		2,11E-04	5,99E-04	2,16E-06
									3,05E+00	1,96E-04	3,86E-04	5,08E-11		2,10E-04	5,95E-04	2,15E-06
									3,08E+00	1,94E-04	3,84E-04	4,99E-11		2,09E-04	5,92E-04	2,13E-06
									3,12E+00	1,93E-04	3,82E-04	4,91E-11		2,08E-04	5,88E-04	2,12E-06
									3,15E+00	1,92E-04	3,79E-04	4,82E-11		2,07E-04	5,85E-04	2,11E-06
									3,19E+00	1,91E-04	3,77E-04	4,74E-11		2,05E-04	5,82E-04	2,10E-06
									3,23E+00	1,90E-04	3,75E-04	4,66E-11		2,04E-04	5,78E-04	2,09E-06
									3,26E+00	1,89E-04	3,73E-04	4,58E-11		2,03E-04	5,75E-04	2,07E-06
									3,30E+00	1,88E-04	3,71E-04	4,50E-11		2,02E-04	5,72E-04	2,06E-06
									3,34E+00	1,87E-04	3,69E-04	4,42E-11		2,01E-04	5,68E-04	2,05E-06
									3,38E+00	1,86E-04	3,66E-04	4,35E-11		2,00E-04	5,65E-04	2,04E-06
									3,42E+00	1,85E-04	3,64E-04	4,27E-11		1,98E-04	5,62E-04	2,03E-06
									3,46E+00	1,84E-04	3,62E-04	4,20E-11		1,97E-04	5,59E-04	2,01E-06
									3,50E+00	1,82E-04	3,60E-04	4,13E-11		1,96E-04	5,55E-04	2,00E-06
									3,54E+00	1,81E-04	3,58E-04	4,06E-11		1,95E-04	5,52E-04	1,99E-06
									3,58E+00	1,80E-04	3,56E-04	3,99E-11		1,94E-04	5,49E-04	1,98E-06
									3,62E+00	1,79E-04	3,54E-04	3,92E-11		1,93E-04	5,46E-04	1,97E-06
									3,66E+00	1,78E-04	3,52E-04	3,85E-11		1,92E-04	5,43E-04	1,96E-06
									3,71E+00	1,77E-04	3,50E-04	3,79E-11		1,91E-04	5,40E-04	1,95E-06
									3,75E+00	1,76E-04	3,48E-04	3,72E-11		1,89E-04	5,37E-04	1,93E-06
									3,79E+00	1,75E-04	3,46E-04	3,66E-11		1,88E-04	5,33E-04	1,92E-06
									3,84E+00	1,74E-04	3,44E-04	3,59E-11		1,87E-04	5,30E-04	1,91E-06
									3,88E+00	1,73E-04	3,42E-04	3,53E-11		1,86E-04	5,27E-04	1,90E-06
									3,93E+00	1,72E-04	3,40E-04	3,47E-11		1,85E-04	5,24E-04	1,89E-06
									3,97E+00	1,71E-04	3,38E-04	3,41E-11		1,84E-04	5,21E-04	1,88E-06
									4,02E+00	1,70E-04	3,36E-04	3,35E-11		1,83E-04	5,18E-04	1,87E-06
									4,06E+00	1,69E-04	3,34E-04	3,30E-11		1,82E-04	5,15E-04	1,86E-06
									4,11E+00	1,68E-04	3,32E-04	3,24E-11		1,81E-04	5,12E-04	1,85E-06
									4,16E+00	1,67E-04	3,30E-04	3,18E-11		1,80E-04	5,09E-04	1,84E-06
									4,21E+00	1,66E-04	3,28E-04	3,13E-11		1,79E-04	5,07E-04	1,83E-06
									4,26E+00	1,65E-04	3,27E-04	3,08E-11		1,78E-04	5,04E-04	1,82E-06
									4,30E+00	1,65E-04	3,25E-04	3,02E-11		1,77E-04	5,01E-04	1,81E-06
									4,35E+00	1,64E-04	3,23E-04	2,97E-11		1,76E-04	4,98E-04	1,80E-06
									4,40E+00	1,63E-04	3,21E-04	2,92E-11		1,75E-04	4,95E-04	1,78E-06
									4,46E+00	1,62E-04	3,19E-04	2,87E-11		1,74E-04	4,92E-04	1,77E-06
									4,51E+00	1,61E-04	3,17E-04	2,82E-11		1,73E-04	4,89E-04	1,76E-06
									4,56E+00	1,60E-04	3,15E-04	2,77E-11		1,72E-04	4,86E-04	1,75E-06
									4,61E+00	1,59E-04	3,14E-04	2,73E-11		1,71E-04	4,84E-04	1,74E-06
									4,67E+00	1,58E-04	3,12E-04	2,68E-11		1,70E-04	4,81E-04	1,73E-06
									4,72E+00	1,57E-04	3,10E-04	2,63E-11		1,69E-04	4,78E-04	1,72E-06
									4,77E+00	1,56E-04	3,08E-04	2,59E-11		1,68E-04	4,75E-04	1,71E-06
									4,83E+00	1,55E-04	3,06E-04	2,54E-11		1,67E-04	4,73E-04	1,70E-06
									4,89E+00	1,54E-04	3,05E-04	2,50E-11		1,66E-04	4,70E-04	1,69E-06
									4,94E+00	1,54E-04	3,03E-04	2,46E-11		1,65E-04	4,67E-04	1,68E-06
									5,00E+00	1,53E-04	3,01E-04	2,41E-11		1,64E-04	4,65E-04	1,68E-06

## Sheet: Supplementary 1B
Figure 6-figure supplement 1: Cross-correlation analysis reveals that the two β-catenin protein isoforms diffuse independently.
(B) HCT116 β-cateninWTClover/∆45Cherry cells were treated with 5 µM of LGK974 for 96 h. 16 h before termination of the experiment 200 ng/ml of recombinant Wnt3a was added. Afterwards, FCS measurements were performed in the cytosol (data shown in Figure 6C) and in the nucleus (shown here). For each data point, a 120-s FCS measurement was carried out in a single cell. Per box plot, more than 40 cel…
	Concentration (nM)									Diffusion coefficient (µm² s-1)
Location	Nucleus				Nucleus					Nucleus				Nucleus
Treatment 1	DMSO				LGK					DMSO				LGK
Treatment 2	Control		+Wnt3a		Control		+Wnt3a			Control		+Wnt3a		Control		+Wnt3a
Version	WT	Δ45	WT	Δ45	WT	Δ45	WT	Δ45		WT	Δ45	WT	Δ45	WT	Δ45	WT	Δ45
	9,74E+00	6,85E+01	7,10E+01	9,99E+01	4,24E+00	4,50E+01	1,82E+01	6,67E+01		2,07E+01	2,15E+01	4,40E+00	6,19E+00	2,16E+01	1,14E+01	9,51E+00	1,56E+01
	1,89E+01	7,07E+01	4,96E+01	6,98E+01	2,56E+00	1,12E+02	1,38E+01	1,23E+02		9,18E+00	1,39E+01	4,76E+00	1,53E+01	2,51E+01	2,34E+01	1,48E+01	4,02E+00
	2,25E+01	6,29E+01	4,01E+01	8,78E+01	2,68E+00	5,44E+01	7,61E+00	3,49E+01		1,23E+01	1,40E+01	9,02E+00	1,18E+01	3,09E+01	3,89E+01	1,36E+01	1,24E+01
	3,03E+01	8,96E+01	4,53E+01	1,21E+02	7,51E+00	7,43E+01	3,92E+01	1,19E+02		7,93E+00	1,34E+01	5,06E+00	5,76E+00	2,44E+01	1,64E+01	8,02E+00	1,24E+01
	2,88E+01	6,28E+01	7,03E+01	1,46E+02	1,77E+00	3,71E+01	2,71E+01	4,82E+01		8,12E+00	1,43E+01	4,05E+00	7,15E+00	1,90E+01	1,51E+01	4,29E+00	4,33E+00
	8,76E+00	9,79E+01	3,38E+01	7,48E+01	6,82E+00	6,12E+01	2,02E+01	5,95E+01		1,44E+01	1,37E+01	9,33E+00	1,09E+01	2,35E+01	1,26E+01	5,81E+00	7,75E+00
	1,22E+01	6,27E+01	5,77E+01	1,58E+02	6,74E+00	8,55E+01	1,25E+01	8,78E+01		1,90E+01	1,22E+01	4,12E+00	7,58E+00	2,85E+01	1,30E+01	1,53E+01	1,90E+01
	3,67E+01	1,12E+02	4,73E+01	1,17E+02	2,95E+00	3,01E+01	1,35E+01	9,00E+01		9,47E+00	1,88E+01	4,66E+00	5,68E+00	3,29E+01	3,32E+01	1,95E+01	1,28E+01
	1,70E+01	1,28E+02	4,96E+01	6,49E+01	2,51E+00	3,63E+01	1,62E+01	1,25E+02		1,23E+01	1,71E+01	7,34E+00	1,80E+01	2,12E+01	1,46E+01	1,09E+01	9,01E+00
	4,11E+01	8,34E+01	2,77E+01	9,66E+01	6,22E+00	5,06E+01	2,62E+01	1,21E+02		8,62E+00	1,55E+01	1,12E+01	1,22E+01	2,48E+01	1,94E+01	7,39E+00	1,23E+01
	2,87E+01	6,91E+01	7,35E+01	1,35E+02	2,48E+00	3,11E+01	2,75E+01	3,66E+01		1,11E+01	1,31E+01	5,26E+00	1,14E+01	2,83E+01	2,00E+01	4,90E+00	1,07E+01
	3,49E+01	7,44E+01	4,64E+01	1,43E+02	5,69E+00	1,08E+02	2,90E+01	9,48E+01		9,10E+00	1,69E+01	7,30E+00	1,30E+01	2,69E+01	1,69E+01	5,78E+00	4,94E+00
	--	--	--	--	--	--	--	--		--	--	--	--	--	--	--	--
	--	--	--	--	--	--	--	--		--	--	--	--	--	--	--	--
	7,24E+01	9,42E+01	3,21E+01	6,57E+01	7,52E+00	3,78E+01	2,22E+01	7,43E+01		5,62E+00	1,35E+01	5,70E+00	8,10E+00	2,54E+01	1,72E+01	1,34E+01	1,54E+01
	1,60E+01	8,03E+01	3,35E+01	7,13E+01	6,46E+00	5,80E+01	1,35E+01	7,10E+01		1,46E+01	9,02E+00	6,59E+00	1,37E+01	1,54E+01	6,51E+00	1,66E+01	1,04E+01
	5,05E+01	1,23E+02	2,31E+01	7,93E+01	2,53E+00	2,88E+01	7,25E+00	7,41E+01		9,83E+00	1,98E+01	1,09E+01	1,15E+01	2,83E+01	4,68E+01	1,16E+01	5,29E+00
	5,33E+01	1,04E+02	2,35E+01	1,31E+02	3,12E+00	3,81E+01	9,12E+00	9,85E+01		9,21E+00	1,26E+01	8,90E+00	7,34E+00	2,23E+01	2,82E+01	2,13E+01	8,87E+00
	4,75E+01	8,84E+01	2,13E+01	5,85E+01	8,30E+00	6,01E+01	9,30E+00	6,84E+01		5,74E+00	1,22E+01	4,60E+00	6,20E+00	2,20E+01	1,85E+01	1,23E+01	1,44E+01
	7,16E+01	1,35E+02	2,02E+01	6,77E+01	4,87E+00	3,32E+01	1,11E+01	5,29E+01		3,47E+00	5,90E+00	5,91E+00	1,37E+01	2,86E+01	3,73E+01	1,18E+01	8,16E+00
	1,85E+01	1,05E+02	3,17E+01	1,27E+02	5,95E+00	3,28E+01	1,28E+01	4,14E+01		2,06E+01	1,45E+01	6,74E+00	7,31E+00	2,05E+01	1,64E+01	1,01E+01	1,25E+01
	2,91E+01	6,64E+01	5,82E+01	7,17E+01	1,11E+01	3,10E+01	8,64E+00	4,59E+01		1,43E+01	1,32E+01	5,16E+00	1,18E+01	1,15E+01	1,34E+01	9,45E+00	1,40E+01
	4,34E+01	4,78E+01	2,93E+01	8,06E+01	2,63E+00	5,60E+01	1,99E+01	9,48E+01		7,22E+00	2,18E+01	1,04E+01	1,22E+01	1,92E+01	1,45E+01	6,21E+00	7,34E+00
	2,65E+01	1,23E+02	3,50E+01	8,67E+01	6,76E+00	5,72E+01	2,16E+01	9,82E+01		1,03E+01	7,53E+00	6,19E+00	1,66E+01	3,00E+01	1,45E+01	6,25E+00	4,61E+00
	5,56E+01	8,88E+01	3,29E+01	8,18E+01	7,11E+00	3,75E+01	7,11E+00	4,12E+01		8,36E+00	1,47E+01	1,34E+01	8,26E+00	2,40E+01	1,21E+01	1,12E+01	9,47E+00
	3,74E+01	9,07E+01	5,46E+01	9,76E+01	7,54E+00	4,40E+01	2,03E+01	2,24E+02		9,63E+00	1,22E+01	6,34E+00	1,62E+01	2,00E+01	7,85E+00	6,12E+00	1,21E+01
	--	--	--	--	--	--	--	--		--	--	--	--	--	--	--	--
	--	--	--	--	--	--	--	--		--	--	--	--	--	--	--	--
	3,17E+01	1,20E+02	4,05E+01	9,07E+01	3,92E+00	8,22E+01	1,02E+01	7,48E+01		9,50E+00	1,23E+01	7,16E+00	1,06E+01	1,79E+01	1,57E+01	9,11E+00	1,85E+01
	2,63E+01	1,12E+02	5,64E+01	1,37E+02	1,17E+00	8,24E+01	1,46E+01	1,08E+02		1,62E+01	1,74E+01	6,24E+00	7,58E+00	1,79E+01	9,99E+00	5,63E+00	4,36E+00
	3,03E+01	9,27E+01	2,36E+01	1,12E+02	2,20E+00	3,22E+01	1,65E+01	1,72E+02		5,39E+00	1,24E+01	6,53E+00	8,01E+00	2,73E+01	2,84E+01	5,15E+00	3,25E+00
	4,13E+01	1,05E+02	3,98E+01	9,88E+01	1,67E+01	6,72E+01	5,64E+00	5,51E+01		9,25E+00	1,19E+01	5,46E+00	1,04E+01	4,92E+00	9,11E+00	8,83E+00	1,22E+01
	2,65E+01	5,92E+01	3,71E+01	1,10E+02	5,12E+00	1,21E+02	1,97E+01	5,36E+01		3,96E+00	8,40E+00	6,31E+00	9,97E+00	2,16E+01	1,00E+01	8,80E+00	1,38E+01
	3,63E+01	8,54E+01	3,88E+01	2,60E+02	2,05E+00	5,22E+01	2,49E+01	7,50E+01		6,85E+00	3,07E+01	8,65E+00	3,80E+00	3,23E+01	1,58E+01	6,41E+00	7,91E+00
	3,72E+01	9,55E+01	3,59E+01	9,52E+01	3,13E+00	6,00E+01	1,35E+01	8,97E+01		7,33E+00	1,06E+01	8,15E+00	1,02E+01	1,26E+01	9,20E+00	8,23E+00	8,85E+00
	2,65E+01	9,06E+01	4,88E+01	1,05E+02	1,44E+01	9,31E+01	2,36E+01	8,24E+01		9,95E+00	1,56E+01	5,97E+00	1,04E+01	2,20E+01	8,06E+00	8,57E+00	6,94E+00
	2,22E+01	7,01E+01	4,13E+01	9,66E+01	8,72E-01	7,96E+01	2,42E+01	7,13E+01		1,08E+01	1,28E+01	5,87E+00	1,21E+01	1,46E+01	1,31E+01	4,39E+00	6,63E+00
	3,28E+01	1,71E+02	3,75E+01	7,75E+01	2,27E+00	7,16E+01	1,32E+01	5,83E+01		4,34E+00	1,75E+00	7,94E+00	1,52E+01	1,43E+01	1,31E+01	8,35E+00	1,14E+01
	1,11E+01	8,38E+01	5,29E+01	1,71E+02	1,20E+01	5,02E+01	6,78E+00	5,30E+01		1,23E+01	1,31E+01	7,60E+00	1,81E+01	1,65E+01	1,37E+01	1,01E+01	1,25E+01
	3,51E+01	1,02E+02	3,63E+01	1,00E+02	2,91E+00	5,20E+01	3,59E+01	8,85E+01		8,53E+00	1,00E+01	8,01E+00	1,69E+01	1,75E+01	1,41E+01	4,00E+00	7,93E+00
