# Supplementary material for: Allele-specific endogenous tagging and quantitative analysis of β-catenin in colorectal cancer cells
Source: eLife. 2022 Jan 11;11:e64498. doi: 10.7554/eLife.64498 (PMC8752093; doi:10.7554/eLife.64498)
Supplement: Figure 7—source data 1. — (B) HCT116 β-cateninWTClover/∆45Cherry and sgAPC targeted clone (APCLOF) cells were treated for ~16 hr with either 10 µM CHIR9901 or DMSO as control. Subsequently, FCS measurements were performed in the cytosol (data shown here) and in the nucleus (data shown in Figure 7—figure supplement 1A). Each data point in the box plots represents a result from a 120 s FCS measurement in a single cell. Per box plot, more than 40 cells were investigated in three independent experiments. p-values were calculated with the Mann-Whitney test (*** <0.001; ** <0.01; * <0.05; NS – non-significant). The exact values are provided in the Supplementary file 1. Figure 7—figure supplement 1: Truncation of APC affects abundance and diffusion of wild-type but not mutant β-catenin in the nucleus. (A) HCT116 β-cateninWTClover/∆45Cherry and sgAPC targeted clone (APCLOF) cells were treated for ~16 hr with either 10 µM CHIR9901 or DMSO as control. Afterward, FCS measurements were performed in the cytosol (data shown in Figure 7) and in the nucleus (shown here). For each data point, a 120 s FCS measurement was carried out in a single cell. Per box plot, more than 40 cells were examined in three independent experiments. p-values were calculated with the Mann-Whitney test (*** <0.001; ** <0.01; * <0.05; NS – non-significant). The exact values are provided as the Supplementary file 1. FCS, fluorescence correlation spectroscopy. [file elife-64498-fig7-data1.xlsx]

## Sheet: B
Figure 7: Truncation of APC affects abundance and diffusional dynamics of wild-type but not mutant β-catenin in the cytosol.
(B) HCT116 β-cateninWTClover/∆45Cherry and sgAPC targeted clone (APCLOF) cells were treated for ~16 h with either 10 µM CHIR9901 or DMSO as control. Subsequently, FCS measurements were performed in the cytosol (data shown here) and in the nucleus (data shown in Figure 7-figure supplement 1A). Each data point in the box plots represents a result from a 120-s FCS measurement in a single cell. Per b…
	Concentration (nM)									Diffusion coefficient (µm² s-1)
Location	Cytosol				Cytosol					Cytosol				Cytosol
Treatment 1	DMSO				CHIR99021					DMSO				CHIR99021
Cell line	#37		APCLOF		#37		APCLOF			#37		APCLOF		#37		APCLOF
Version	WT	Δ45	WT	Δ45	WT	Δ45	WT	Δ45		WT	Δ45	WT	Δ45	WT	Δ45	WT	Δ45
	4,50E+01	5,72E+01	1,03E+02	8,24E+01	1,05E+02	9,88E+01	1,37E+02	1,14E+02		1,29E+01	1,18E+01	1,00E+01	1,22E+01	9,02E+00	1,39E+01	1,00E+01	1,62E+01
	3,02E+01	7,23E+01	9,96E+01	7,60E+01	1,38E+02	1,28E+02	1,14E+02	7,16E+01		2,10E+01	7,89E+00	8,87E+00	1,43E+01	7,65E+00	1,06E+01	6,36E+00	1,00E+01
	3,43E+01	6,66E+01	9,50E+01	7,77E+01	1,17E+02	1,95E+02	1,37E+02	8,12E+01		2,61E+01	8,33E+00	6,68E+00	7,09E+00	5,59E+00	7,74E+00	9,69E+00	1,48E+01
	4,57E+01	7,55E+01	8,68E+01	5,38E+01	9,96E+01	9,20E+01	7,68E+01	5,74E+01		1,60E+01	1,57E+01	7,48E+00	1,11E+01	9,70E+00	1,34E+01	6,68E+00	1,05E+01
	4,17E+01	7,93E+01	8,53E+01	5,36E+01	6,76E+01	6,81E+01	1,31E+02	8,23E+01		1,50E+01	1,11E+01	8,38E+00	1,11E+01	8,17E+00	1,27E+01	9,38E+00	1,46E+01
	5,67E+01	9,09E+01	7,58E+01	7,37E+01	1,18E+02	1,01E+02	9,26E+01	6,93E+01		1,57E+01	9,74E+00	8,94E+00	1,21E+01	7,00E+00	9,28E+00	7,27E+00	1,01E+01
	3,14E+01	8,30E+01	7,57E+01	8,01E+01	1,09E+02	9,29E+01	6,83E+01	4,25E+01		2,38E+01	1,16E+01	1,04E+01	1,33E+01	8,92E+00	1,43E+01	8,24E+00	1,22E+01
	5,03E+01	1,05E+02	9,78E+01	7,53E+01	1,56E+02	1,20E+02	1,30E+02	7,44E+01		1,94E+01	1,19E+01	1,11E+01	1,73E+01	9,65E+00	1,66E+01	5,85E+00	8,53E+00
	3,27E+01	1,07E+02	7,63E+01	6,94E+01	7,18E+01	6,36E+01	1,40E+02	1,03E+02		2,15E+01	7,15E+00	8,16E+00	1,27E+01	8,30E+00	1,21E+01	5,91E+00	7,55E+00
	4,83E+01	1,53E+02	1,21E+02	8,64E+01	8,96E+01	7,41E+01	1,18E+02	8,17E+01		2,37E+01	1,26E+01	1,02E+01	1,24E+01	9,53E+00	1,36E+01	6,71E+00	8,57E+00
	6,00E+01	1,25E+02	7,91E+01	6,59E+01	1,40E+02	1,17E+02	9,30E+01	7,28E+01		1,21E+01	8,83E+00	1,10E+01	1,43E+01	8,60E+00	1,08E+01	1,01E+01	1,61E+01
	4,35E+01	7,53E+01	1,12E+02	8,13E+01	7,27E+01	6,12E+01	9,09E+01	8,09E+01		1,40E+01	1,04E+01	6,33E+00	1,04E+01	6,01E+00	8,73E+00	9,22E+00	1,29E+01
	3,08E+01	5,97E+01	1,06E+02	8,30E+01	1,02E+02	6,96E+01	1,19E+02	7,83E+01		2,20E+01	1,09E+01	8,57E+00	1,24E+01	8,01E+00	1,23E+01	7,59E+00	1,28E+01
	6,12E+01	1,20E+02	7,33E+01	5,29E+01	1,35E+02	9,90E+01	1,49E+02	9,91E+01		1,43E+01	8,53E+00	1,05E+01	1,38E+01	6,88E+00	1,10E+01	8,97E+00	1,50E+01
	4,94E+01	8,35E+01	8,32E+01	4,97E+01	9,95E+01	9,45E+01	1,16E+02	7,79E+01		2,13E+01	1,35E+01	9,79E+00	1,31E+01	6,97E+00	8,60E+00	5,94E+00	8,42E+00
	5,34E+01	8,95E+01	1,02E+02	8,28E+01	1,31E+02	1,19E+02	1,01E+02	7,28E+01		1,11E+01	8,08E+00	8,47E+00	9,77E+00	7,54E+00	9,13E+00	6,62E+00	9,08E+00
	3,87E+01	5,95E+01	9,03E+01	9,11E+01	1,40E+02	1,42E+02	1,37E+02	7,73E+01		2,19E+01	1,13E+01	9,66E+00	1,21E+01	1,08E+01	1,37E+01	7,33E+00	1,58E+01
										--	--			--	--
	2,91E+01	6,49E+01	1,27E+02	7,92E+01	7,05E+01	6,81E+01	1,28E+02	5,94E+01		2,72E+01	9,02E+00	5,66E+00	7,55E+00	6,97E+00	8,13E+00	1,01E+01	1,34E+01
	3,04E+01	5,88E+01	8,04E+01	5,92E+01	7,06E+01	7,20E+01	9,21E+01	2,44E+02		1,29E+01	1,36E+01	7,14E+00	1,03E+01	7,56E+00	8,72E+00	9,75E+00	1,19E+01
	2,62E+01	7,21E+01	7,92E+01	6,50E+01	1,46E+02	1,04E+02	9,34E+01	6,08E+01		1,72E+01	8,94E+00	8,73E+00	1,11E+01	7,47E+00	9,94E+00	1,02E+01	1,19E+01
	3,00E+01	6,60E+01	1,01E+02	6,64E+01	7,65E+01	7,41E+01	1,36E+02	8,23E+01		9,48E+00	1,13E+01	9,52E+00	1,36E+01	8,93E+00	1,15E+01	7,34E+00	1,06E+01
	2,30E+01	6,24E+01	1,42E+02	7,89E+01	6,09E+01	1,15E+02	1,01E+02	5,48E+01		1,43E+01	1,10E+01	6,47E+00	1,32E+01	8,73E+00	9,78E+00	7,53E+00	1,02E+01
	2,30E+01	8,56E+01	6,58E+01	4,48E+01	1,17E+02	9,41E+01	1,15E+02	7,20E+01		1,23E+01	8,17E+00	6,98E+00	1,13E+01	8,23E+00	9,69E+00	6,68E+00	8,88E+00
	2,16E+01	7,97E+01	9,87E+01	6,99E+01	1,09E+02	1,38E+02	1,36E+02	7,12E+01		3,03E+01	9,20E+00	9,87E+00	1,53E+01	6,10E+00	9,20E+00	9,38E+00	1,20E+01
	1,97E+01	6,09E+01	9,75E+01	6,74E+01	8,92E+01	5,37E+01	1,65E+02	8,32E+01		1,59E+01	9,83E+00	1,04E+01	1,47E+01	8,53E+00	1,14E+01	7,89E+00	1,43E+01
	2,73E+01	7,33E+01	1,14E+02	8,20E+01	1,13E+02	1,06E+02	1,10E+02	6,66E+01		1,49E+01	9,77E+00	6,84E+00	1,15E+01	8,62E+00	1,05E+01	7,93E+00	9,87E+00
	1,85E+01	5,76E+01	1,04E+02	7,30E+01	6,73E+01	7,55E+01	1,58E+02	7,75E+01		2,51E+01	9,27E+00	6,86E+00	9,16E+00	9,82E+00	1,41E+01	8,19E+00	1,33E+01
	3,99E+01	8,45E+01	1,31E+02	8,65E+01	1,30E+02	1,10E+02	1,11E+02	5,62E+01		8,08E+00	8,64E+00	1,14E+01	1,72E+01	1,02E+01	1,47E+01	6,21E+00	8,06E+00
	2,95E+01	7,78E+01	7,44E+01	7,25E+01	1,31E+02	1,17E+02	1,13E+02	5,91E+01		1,37E+01	1,26E+01	1,10E+01	1,43E+01	9,18E+00	1,25E+01	6,22E+00	1,40E+01
	2,82E+01	6,52E+01	1,22E+02	8,21E+01	1,22E+02	8,11E+01	8,90E+01	8,82E+01		1,29E+01	1,26E+01	7,35E+00	1,13E+01	7,63E+00	1,10E+01	8,33E+00	1,01E+01
										--	--			--	--	--	--
	4,54E+01	8,35E+01	1,11E+02	6,75E+01	6,12E+01	6,25E+01	7,78E+01	5,54E+01		2,78E+01	8,21E+00	1,02E+01	1,50E+01	1,24E+01	1,49E+01	7,58E+00	1,13E+01
	2,74E+01	7,62E+01	7,51E+01	4,99E+01	6,38E+01	5,94E+01	1,59E+02	6,91E+01		2,56E+01	9,84E+00	1,08E+01	1,60E+01	8,16E+00	1,14E+01	6,40E+00	1,18E+01
	2,44E+01	4,75E+01	1,08E+02	6,11E+01	9,57E+01	7,73E+01	1,33E+02	5,05E+01		2,63E+01	9,90E+00	8,75E+00	1,36E+01	8,78E+00	1,20E+01	6,50E+00	1,20E+01
	2,03E+01	7,10E+01	9,61E+01	5,34E+01	9,34E+01	9,36E+01	9,89E+01	4,48E+01		4,13E+01	9,14E+00	1,03E+01	1,20E+01	1,19E+01	2,00E+01	8,93E+00	1,38E+01
	3,98E+01	7,60E+01	5,95E+01	2,61E+01	1,06E+02	1,20E+02	9,73E+01	6,35E+01		1,85E+01	1,23E+01	1,03E+01	1,41E+01	7,59E+00	1,17E+01	1,35E+01	2,19E+01
	2,05E+01	1,99E+01	1,08E+02	6,77E+01	1,33E+02	9,16E+01	1,09E+02	6,86E+01		2,84E+01	2,19E+01	1,13E+01	1,49E+01	8,74E+00	1,17E+01	7,58E+00	1,07E+01
	1,13E+02	1,03E+02	5,83E+01	4,50E+01	1,04E+02	7,33E+01	9,13E+01	4,89E+01		7,73E+00	8,85E+00	1,14E+01	1,44E+01	8,35E+00	1,22E+01	6,72E+00	1,13E+01
	2,12E+01	5,05E+01	9,82E+01	6,14E+01	9,19E+01	6,43E+01	9,12E+01	4,41E+01		2,59E+01	1,38E+01	9,00E+00	1,23E+01	8,39E+00	1,28E+01	9,76E+00	1,48E+01
	8,36E+01	9,64E+01	8,89E+01	5,32E+01	8,23E+01	9,40E+01	9,51E+01	4,49E+01		1,29E+01	1,76E+01	6,98E+00	9,99E+00	9,35E+00	1,23E+01	1,06E+01	1,44E+01
	5,90E+01	7,11E+01	7,64E+01	4,88E+01	1,99E+02	1,24E+02	1,04E+02	6,48E+01		1,19E+01	1,58E+01	1,11E+01	1,60E+01	6,24E+00	9,15E+00	8,71E+00	1,33E+01
	3,70E+01	7,43E+01	1,03E+02	5,76E+01	7,81E+01	7,35E+01	9,99E+01	7,21E+01		1,75E+01	1,28E+01	9,26E+00	1,33E+01	8,50E+00	1,12E+01	9,71E+00	1,43E+01
	3,13E+01	4,15E+01	8,87E+01	5,30E+01	8,91E+01	5,97E+01	9,66E+01	4,85E+01		2,51E+01	1,50E+01	8,07E+00	9,52E+00	9,60E+00	1,35E+01	6,58E+00	9,82E+00

## Sheet: Supplementary A
Figure 7-figure supplement 1: Truncation of APC affects abundance and diffusion of wild-type but not mutant β-catenin in the nucleus.
(A) HCT116 β-cateninWTClover/∆45Cherry and sgAPC targeted clone (APCLOF) cells were treated for ~ 16 h with either 10 µM CHIR9901 or DMSO as control. Afterwards, FCS measurements were performed in the cytosol (data shown in Figure 7) and in the nucleus (shown here). For each data point, a 120-s FCS measurement was carried out in a single cell. Per box plot, more than 40 cells were examined in thr…
	Concentration (nM)									Diffusion coefficient (µm² s-1)
Location	Nucleus				Nucleus					Nucleus				Nucleus
Treatment 1	DMSO				CHIR99021					DMSO				CHIR99021
Cell line	#37		APCLOF		#37		APCLOF			#37		APCLOF		#37		APCLOF
Version	WT	Δ45	WT	Δ45	WT	Δ45	WT	Δ45		WT	Δ45	WT	Δ45	WT	Δ45	WT	Δ45
	4,51E+01	1,02E+02	9,19E+01	8,55E+01	8,53E+01	1,18E+02	1,04E+02	9,01E+01		1,37E+01	1,28E+01	7,78E+00	9,64E+00	6,03E+00	8,44E+00	7,41E+00	1,35E+01
	2,41E+01	5,60E+01	1,17E+02	9,20E+01	1,14E+02	1,08E+02	1,18E+02	8,14E+01		2,08E+01	1,20E+01	8,10E+00	1,62E+01	7,68E+00	1,06E+01	2,76E+00	6,06E+00
	3,37E+01	7,84E+01	8,11E+01	8,39E+01	1,20E+02	2,07E+02	1,35E+02	7,99E+01		2,63E+01	1,42E+01	6,59E+00	1,33E+01	5,95E+00	9,10E+00	5,66E+00	1,36E+01
	3,50E+01	6,07E+01	8,48E+01	5,68E+01	7,38E+01	7,77E+01	7,98E+01	6,26E+01		1,83E+01	1,66E+01	4,42E+00	1,15E+01	4,38E+00	7,42E+00	7,74E+00	1,51E+01
	4,15E+01	9,61E+01	6,33E+01	4,82E+01	6,03E+01	7,62E+01	9,28E+01	5,39E+01		1,55E+01	1,51E+01	--	1,19E+01	6,86E+00	1,23E+01	4,48E+00	7,32E+00
	4,89E+01	1,06E+02	9,14E+01	1,20E+02	1,30E+02	9,37E+01	8,93E+01	6,79E+01		1,36E+01	1,27E+01	6,40E+00	8,98E+00	6,24E+00	1,37E+01	6,20E+00	9,57E+00
	2,91E+01	1,34E+02	9,01E+01	9,88E+01	8,48E+01	7,65E+01	6,43E+01	4,31E+01		1,11E+01	6,99E+00	7,74E+00	1,21E+01	5,09E+00	7,04E+00	4,48E+00	7,56E+00
	2,03E+01	4,84E+01	1,00E+02	1,20E+02	1,14E+02	1,13E+02	8,61E+01	5,85E+01		1,60E+01	9,38E+00	7,18E+00	1,01E+01	4,88E+00	6,41E+00	8,50E+00	1,54E+01
	1,89E+01	8,00E+01	5,52E+01	4,81E+01	1,06E+02	1,05E+02	7,15E+01	7,19E+01		1,61E+01	6,72E+00	7,37E+00	1,38E+01	2,93E+00	3,99E+00	7,69E+00	1,36E+01
	3,79E+01	1,17E+02	9,34E+01	7,64E+01	7,56E+01	6,68E+01	9,94E+01	7,64E+01		1,71E+01	1,00E+01	7,47E+00	9,08E+00	6,69E+00	9,48E+00	6,74E+00	1,23E+01
	3,60E+01	7,28E+01	7,69E+01	8,18E+01	1,36E+02	1,18E+02	7,36E+01	7,54E+01		1,26E+01	1,48E+01	9,37E+00	1,23E+01	8,46E+00	1,50E+01	6,57E+00	9,65E+00
	3,82E+01	7,94E+01	1,10E+02	1,08E+02	1,10E+02	1,02E+02	1,02E+02	9,65E+01		1,39E+01	1,72E+01	6,64E+00	1,08E+01	4,66E+00	6,22E+00	5,40E+00	1,08E+01
	3,02E+01	5,87E+01	1,11E+02	8,37E+01	1,04E+02	1,15E+02	1,55E+02	1,18E+02		1,64E+01	1,23E+01	8,53E+00	1,45E+01	7,34E+00	1,30E+01	7,59E+00	1,29E+01
	6,27E+01	1,66E+02	9,39E+01	9,28E+01	1,30E+02	1,07E+02	2,32E+02	1,47E+02		1,64E+01	1,23E+01	6,65E+00	9,98E+00	5,44E+00	9,67E+00	5,99E+00	9,67E+00
	3,70E+01	7,42E+01	1,27E+02	8,81E+01	7,10E+01	8,28E+01	1,27E+02	1,09E+02		1,89E+01	1,48E+01	6,54E+00	7,78E+00	6,72E+00	1,06E+01	6,68E+00	1,20E+01
	3,87E+01	7,90E+01	9,96E+01	8,50E+01	1,36E+02	1,23E+02	1,08E+02	9,20E+01		7,30E+00	5,92E+00	6,99E+00	1,10E+01	7,72E+00	1,14E+01	6,22E+00	1,03E+01
	3,28E+01	9,29E+01			1,34E+02	1,36E+02	1,58E+02	1,12E+02		1,31E+01	6,67E+00	7,33E+00	1,07E+01	6,36E+00	1,09E+01	7,38E+00	1,28E+01
	--	--			--	--				--	--	--	--	--	--	--	--
	2,31E+01	1,13E+02	7,88E+01	6,63E+01	9,35E+01	1,02E+02	9,65E+01	5,32E+01		1,74E+01	7,64E+00	6,97E+00	9,16E+00	4,36E+00	7,23E+00	7,59E+00	1,07E+01
	3,32E+01	7,55E+01	7,98E+01	6,43E+01	4,65E+01	5,35E+01	9,78E+01	2,92E+02		9,72E+00	1,35E+01	5,97E+00	8,14E+00	5,80E+00	9,14E+00	7,99E+00	1,26E+01
	1,87E+01	5,93E+01	8,52E+01	9,20E+01	1,22E+02	1,09E+02	8,55E+01	6,18E+01		1,45E+01	1,20E+01	7,45E+00	1,46E+01	6,26E+00	1,14E+01	5,57E+00	1,08E+01
	3,02E+01	5,54E+01	7,55E+01	6,16E+01	7,34E+01	8,79E+01	1,06E+02	7,09E+01		6,91E+00	1,19E+01	6,83E+00	9,87E+00	7,00E+00	1,29E+01	8,77E+00	1,57E+01
	4,25E+01	9,61E+01	1,32E+02	8,99E+01	7,92E+01	1,23E+02	8,61E+01	5,80E+01		9,83E+00	1,07E+01	6,26E+00	1,09E+01	5,94E+00	8,71E+00	7,20E+00	1,16E+01
	2,20E+01	7,73E+01	6,66E+01	5,42E+01	6,14E+01	7,55E+01	1,09E+02	7,62E+01		1,07E+01	1,17E+01	5,97E+00	1,19E+01	4,18E+00	6,61E+00	9,51E+00	1,60E+01
	1,46E+01	6,83E+01	9,26E+01	6,83E+01	6,07E+01	1,09E+02	7,30E+01	3,88E+01		2,10E+01	1,11E+01	5,33E+00	9,86E+00	3,27E+00	6,75E+00	2,95E+00	6,80E+00
	1,57E+01	5,49E+01	8,56E+01	7,15E+01	6,87E+01	5,44E+01	1,27E+02	8,57E+01		1,73E+01	1,56E+01	6,92E+00	1,16E+01	9,08E+00	1,31E+01	7,67E+00	1,26E+01
	2,09E+01	7,39E+01	1,06E+02	7,71E+01	9,62E+01	1,09E+02	1,02E+02	7,51E+01		1,13E+01	6,95E+00	5,54E+00	9,91E+00	9,15E+00	1,35E+01	8,65E+00	1,45E+01
	1,57E+01	6,29E+01	7,23E+01	5,51E+01	7,42E+01	1,10E+02	1,50E+02	8,36E+01		1,36E+01	6,81E+00	5,03E+00	1,09E+01	6,87E+00	1,00E+01	5,82E+00	1,27E+01
	3,54E+01	7,06E+01	1,31E+02	7,48E+01	1,40E+02	1,17E+02	1,40E+02	7,72E+01		1,06E+01	1,50E+01	5,75E+00	1,23E+01	6,54E+00	1,04E+01	5,14E+00	1,11E+01
	4,23E+01	1,22E+02	6,83E+01	6,46E+01	8,62E+01	9,17E+01	9,26E+01	6,88E+01		1,05E+01	6,97E+00	1,09E+01	1,78E+01	6,34E+00	9,88E+00	5,16E+00	1,01E+01
	--	--	1,10E+02	8,17E+01	9,91E+01	6,83E+01	7,36E+01	9,04E+01		--	--	5,90E+00	1,00E+01	2,56E+00	4,58E+00	7,25E+00	1,22E+01
	--	--			--	--	--	--		--	--			--	--
	2,07E+01	5,09E+01	1,43E+02	6,93E+01	7,52E+01	1,10E+02	8,96E+01	1,18E+02		2,12E+01	8,62E+00	6,28E+00	1,61E+01	6,87E+00	9,08E+00	6,02E+00	1,16E+01
	1,62E+01	6,27E+01	9,09E+01	7,18E+01	5,35E+01	7,38E+01	1,42E+02	7,57E+01		2,27E+01	1,10E+01	1,03E+01	1,66E+01	6,69E+00	9,63E+00	5,55E+00	1,05E+01
	1,37E+01	4,40E+01	9,35E+01	5,94E+01	1,16E+02	1,09E+02	1,30E+02	6,32E+01		2,31E+01	1,14E+01	6,70E+00	1,29E+01	7,51E+00	1,09E+01	7,52E+00	1,68E+01
	1,17E+01	5,84E+01	8,63E+01	4,82E+01	6,30E+01	7,92E+01	2,26E+02	1,04E+02		2,84E+01	1,88E+01	9,41E+00	1,75E+01	9,38E+00	1,39E+01	1,01E+01	1,48E+01
	1,99E+01	7,05E+01	6,37E+01	3,88E+01	9,64E+01	1,11E+02	9,92E+01	6,79E+01		1,73E+01	1,48E+01	6,89E+00	9,94E+00	6,37E+00	1,09E+01	7,55E+00	1,29E+01
	1,08E+01	2,34E+01	6,78E+01	4,70E+01	1,31E+02	1,08E+02	1,24E+02	8,32E+01		1,96E+01	2,34E+01	8,67E+00	1,03E+01	8,98E+00	1,52E+01	7,53E+00	1,18E+01
	4,73E+01	6,28E+01	7,85E+01	6,39E+01	1,18E+02	1,12E+02	9,43E+01	5,44E+01		8,37E+00	1,38E+01	8,29E+00	1,07E+01	7,19E+00	1,36E+01	4,10E+00	8,43E+00
	1,21E+01	4,10E+01	6,88E+01	4,21E+01	9,71E+01	8,89E+01	1,10E+02	6,71E+01		2,10E+01	1,54E+01	8,26E+00	1,14E+01	9,11E+00	1,45E+01	6,01E+00	1,07E+01
	5,67E+01	7,07E+01	9,05E+01	6,63E+01	1,05E+02	1,08E+02	7,86E+01	5,15E+01		7,62E+00	1,05E+01	7,57E+00	1,21E+01	8,74E+00	1,30E+01	5,57E+00	7,65E+00
	4,68E+01	6,41E+01	1,07E+02	7,25E+01	1,26E+02	1,11E+02	1,33E+02	8,93E+01		6,85E+00	1,18E+01	8,09E+00	1,14E+01	5,93E+00	1,06E+01	6,51E+00	1,29E+01
	2,59E+01	6,89E+01	9,99E+01	6,61E+01	1,33E+02	1,39E+02	1,48E+02	7,09E+01		1,36E+01	1,12E+01	7,38E+00	1,07E+01	7,26E+00	9,76E+00	4,08E+00	5,65E+00
	2,00E+01	4,18E+01	7,69E+01	4,81E+01	1,07E+02	8,74E+01	1,47E+02	8,19E+01		2,16E+01	1,30E+01	6,88E+00	1,04E+01	4,94E+00	8,49E+00	4,91E+00	8,33E+00
